# Supplementary material for: Optimizing optical anisotropy in low-dimensional structures via intralayer hydrogen bonding modulation and anionic substitution
Source: Royal Society of Chemistry journal article supplement (doi:10.1039/d4mh01790k), 2025-01-01
Supplement: d4mh01790k1.pdf [file d4mh01790k1.pdf]

# Optimizing Optical Anisotropy in Low-Dimensional Structures via Intralayer Hydrogen Bonding Modulation and Anionic Substitution

Muhammad Arif,<sup>†,‡</sup> Xu Liu,<sup>†</sup> Hangwei Jia,<sup>†</sup> Zhihua Yang,<sup>†,‡</sup> Xueling Hou,<sup>\*,†,‡</sup> Shilie Pan<sup>\*,†,‡</sup>

<sup>†</sup>Research Center for Crystal Materials; CAS Key Laboratory of Functional Materials and Devices for Special Environments; Xinjiang Key Laboratory of Functional Crystal Materials; Xinjiang Technical Institute of Physics and Chemistry, Chinese Academy of Sciences, 40-1 South Beijing Road, Urumqi 830011, China.

<sup>‡</sup>Center of Materials Science and Optoelectronics Engineering, University of Chinese Academy of Sciences, Beijing 100049, China.

\*To whom correspondence should be addressed, E-mails: xlhou@ms.xjb.ac.cn (Xueling Hou), slpan@ms.xjb.ac.cn (Shilie Pan)

## Table of contents

|                                                                                                                                                                                                                      |    |
|----------------------------------------------------------------------------------------------------------------------------------------------------------------------------------------------------------------------|----|
| <b>1. Experimental Section</b> .....                                                                                                                                                                                 | 1  |
| <b>1.1. Synthesis and Crystal Growth</b> .....                                                                                                                                                                       | 1  |
| <b>1.2. Characterization</b> .....                                                                                                                                                                                   | 1  |
| <b>1.3. Theoretical Calculations</b> .....                                                                                                                                                                           | 3  |
| <b>Table S1.</b> Crystal data and structure refinement for <b>I-1-I-2</b> , <b>II-1-II-3</b> , <b>III</b> , and <b>IV</b> .....                                                                                      | 4  |
| <b>Table S2.</b> Fractional atomic coordinates ( $\times 10^4$ ) and isotropic displacement parameters ( $\text{\AA}^2 \times 10^3$ ) for <b>I-1-I-2</b> , <b>II-1-II-3</b> , <b>III</b> , and <b>IV</b> .....       | 6  |
| <b>Table S3.</b> Bond lengths [ $\text{\AA}$ ] and angles [ $^\circ$ ] of <b>I-1-I-2</b> , <b>II-1-II-3</b> , <b>III</b> , and <b>IV</b> .....                                                                       | 8  |
| <b>Table S4.</b> Hydrogen atom coordinates ( $\text{\AA} \times 10^4$ ) and isotropic displacement parameters ( $\text{\AA}^2 \times 10^3$ ) of <b>I-1-I-2</b> , <b>II-1-II-3</b> , <b>III</b> , and <b>IV</b> ..... | 11 |
| <b>Table S5.</b> Hydrogen bonds of <b>I-1-I-2</b> , <b>II-1-II-3</b> , <b>III</b> , and <b>IV</b> .....                                                                                                              | 13 |
| <b>Table S6.</b> NLO properties comparison among inorganic and metal-free organic FBBS .....                                                                                                                         | 15 |
| <b>Table S7.</b> Comparisons of title compounds with known semi-organic crystals .....                                                                                                                               | 17 |
| <b>Table S8.</b> Comparisons of title compounds with known semi-organic compounds in their corresponding families .....                                                                                              | 19 |
| <b>Table S9.</b> Assignments of the IR peaks for <b>I-1-I-2</b> , <b>II-1-II-3</b> , <b>III</b> , and <b>IV</b> .....                                                                                                | 20 |
| <b>Figure S1.</b> Powder XRD patterns of <b>I-1-I-2</b> , <b>II-1-II-3</b> , <b>III</b> , and <b>IV</b> .....                                                                                                        | 21 |
| <b>Figure S2.</b> UV-vis-NIR diffuse reflectance spectra and corresponding experimental band gaps of <b>I-1-I-2</b> , <b>II-1-II-3</b> , <b>III</b> , and <b>IV</b> .....                                            | 22 |
| <b>Figure S3.</b> DSC and TG curves of <b>I-1-I-2</b> , <b>II-1-II-3</b> , <b>III</b> , and <b>IV</b> .....                                                                                                          | 23 |
| <b>Figure S4.</b> IR spectra of <b>I-1-I-2</b> , <b>II-1-II-3</b> , <b>III</b> , and <b>IV</b> .....                                                                                                                 | 24 |
| <b>Figure S5.</b> The calculated band gaps and partial densities of states for <b>I-1-I-2</b> , <b>II-1-II-3</b> , <b>III</b> , and <b>IV</b> .....                                                                  | 26 |

|                                                                                                                                                                                        |    |
|----------------------------------------------------------------------------------------------------------------------------------------------------------------------------------------|----|
| <b>Figure S6.</b> Calculated birefringence and triaxial ellipsoid of three refractive indices along crystallographic axes for <b>I-1–I-2</b> , <b>II-1–II-3</b> , and <b>III</b> ..... | 27 |
| <b>Figure S7.</b> Visualization of hirshfeld surfaces .....                                                                                                                            | 28 |
| <b>Figure S8.</b> Visualization of 2D fingerprint plots for overall interactions and individual interactions of atom types in crystal packing .....                                    | 32 |
| <b>Figure S9.</b> Visualization of hydrogen bonding, spatial arrangement and dihedral angle of <b>I-1–I-2</b> , <b>II-1–II-3</b> , <b>III</b> , and <b>IV</b> .....                    | 37 |
| <b>Figure S10.</b> Crystal packing of <b>IV</b> .....                                                                                                                                  | 38 |
| <b>Figure S11.</b> Birefringence measurements under the polarizing microscope and the thickness for <b>I-1–I-2</b> , <b>II-1</b> , <b>II-3</b> , and <b>IV</b> .....                   | 39 |
| <b>Figure S12.</b> Energy dispersive X-ray spectroscopy (EDS) analysis of <b>I-1</b> .....                                                                                             | 40 |
| <b>Figure S13.</b> Spatial Arrangement of functional units and SHG-weighted densities in <b>I-1</b> .....                                                                              | 41 |
| <b>References</b> .....                                                                                                                                                                | 42 |

# 1. Experimental Section

## 1.1. Synthesis and Crystal Growth

The reactants,  $C_4H_5N_3$  ( $\geq 99\%$ ),  $H_3PO_4$  ( $\geq 85\%$  in  $H_2O$ ),  $HF_4$  ( $\geq 40\%$  in  $H_2O$ ),  $CF_3SO_3H$  ( $\geq 98\%$  in  $H_2O$ ),  $NH_2SO_3H$  ( $\geq 99\%$ ),  $CH_3SO_3H$  ( $\geq 70\%$  in  $H_2O$ ),  $C_4H_6O_4$  ( $\geq 99\%$ ), and  $H_3BO_3$  ( $\geq 99\%$ ) were purchased from Aladdin Chemistry Aladdin Chemical Industry Co., Ltd., and used without further purification. Single crystals of all seven compounds were obtained using a solvent diffusion method. A (1:1) molar ratio of  $C_4H_5N_3$  along with  $H_3PO_4$  and  $C_4H_6O_4$  in 20 mL (3:water + 2:ethanol) solvent for **I-1** and **III** while (1:1) molar ratio of  $C_4H_5N_3$  along with  $HF_4$ ,  $CF_3SO_3H$ ,  $NH_3SO_3$ ,  $CH_3SO_3H$  and  $H_3BO_3$  for **I-2**, **II-1–II-3** and **IV** were dissolved in 20 mL ethanol solvent in a clean beaker while stirring using magnetic stirrer until the solution became clear, filtered it to remove any suspended impurities. Then the solution was covered by parafilm and we made small holes to control the evaporation rate and kept it undisturbed at ambient temperature to evaporate. Good optical quality cocrystals of centimeter-sized and millimeter-sized single crystals were harvested from the mother solution within several weeks.

## 1.2. Characterization

Single crystals of **I-1–I-2**, **II-1–II-3**, **III**, and **IV** used in the single-crystal X-ray diffraction (XRD) data measurement were separated under a polarization contrast microscope. Single-crystal XRD data were collected at room temperature by a Bruker D8 Venture CMOS X-ray diffractometer with Mo  $K\alpha$  radiation ( $\lambda = 0.71073 \text{ \AA}$ ). Intensity corrections for Lorentz and polarization effects were performed with the SAINT program.<sup>[1]</sup> The structure solution and parameter refinement (full-matrix least-squares against  $F^2$ ) were performed by using the SHELX-14 suite on olex2 software with anisotropic displacement parameters for all atoms.<sup>[2]</sup> The structural data were also inspected for possible missing symmetries using the PLATON program and no higher symmetries were found.<sup>[3]</sup> The summary of the key crystallographic parameters of the crystals **I-1–I-2**, **II-1–II-3**, **III**, and **IV** is provided in Table S1. The final refined atomic positions and selected bond distances and angles are given in Table S3. The polycrystalline powder samples of **I-1–I-2**, **II-1–II-3**, **III**, and **IV** were acquired by grinding the as-grown crystals directly. The purity of these samples was subsequently validated through X-ray diffraction analysis. Powder XRD measurements were performed on Bruker D2 Advance X-ray diffractometer using monochromated Cu  $K\alpha$  radiation ( $\lambda = 1.5418 \text{ \AA}$ ,  $2\theta = 5$  to  $70^\circ$ , scan step width =  $0.02^\circ$ , and counting time = 1 s/step). The powder XRD patterns for **I-1–I-2**, **II-**

**I-II-3**, **III**, and **IV** are shown in Figure S1, and it is clear that the experimental profiles are in line with the simulated ones. Elemental analyses were measured using an energy dispersive X-ray spectrometer (Oxford, X-Max 50) operated at 5 kV was utilized for examining the EDS spectrum at room temperature using a scanning electron microscope with field emission scanning electronic microscope (FE-SEM, JEOL JSM-7610F Plus, Japan) (Figure S12). The NETZSCH STA 449C thermal analysis instrument was used to test the thermal habit of **I-1-I-2**, **II-1-II-3**, **III**, and **IV**. The test conditions were performed by heating the polycrystalline powder samples from 40 to 600 °C at a constant rate of 5 °C/min under a flowing nitrogen atmosphere (Figure S3). Infrared (IR) spectra were recorded on a Shimadzu IR Affinity-1 IR spectrometer ranging from 4000 to 400 cm<sup>-1</sup> to verify functional groups. The spectral resolution is about 1 cm<sup>-1</sup>. The samples were pressed into discs (1 mg of the sample and 200 mg of KBr) (Figure S4). UV-vis-NIR diffuses reflectance spectra were measured with a Shimadzu SolidSpec-3700 DUV spectrophotometer in the wavelength range of 200-2000 nm (Figure S2). The spectral resolution is about 0.1 nm. The Kurtz–Perry method was employed for powder second harmonic generation (SHG) measurements of **A-1** and **B-1** using a Q-switched Nd: YVO4 solid-state laser with an incident wavelength of 1064 nm. Before measurements, polycrystalline samples of the aforementioned compounds were finely ground into powder and divided into six different particle size ranges (20–38, 38–55, 55–88, 88–105, 105–150, 150–200, and 200–250 μm). Additionally, microcrystalline KDP samples were sieved into the same particle size ranges and used as references for SHG. Subsequently, all microcrystalline samples were placed between microscope cover glass slides with a diameter of 6 mm and secured with 1 mm thick tape.<sup>[4]</sup> Birefringence measurements were conducted using a ZEISS Axio Scope polarizing microscope equipped with a Berek compensator. Small crystals were carefully chosen for measurement at a wavelength of 546 nm. The birefringence was calculated using the equation (1).

$$R = |N_e - N_o| = \Delta n \times T \quad (1)$$

where  $R$  denotes the optical path difference,  $\Delta n$  represents the birefringence, and  $T$  signifies the thickness of the crystal (Figure S11). Molecular Hirshfeld surfaces and related 2D fingerprint plots of **I-1-I-2**, **II-1-II-3**, **III**, and **IV** were produced using a CIF file to analyze the crystal structures generated by the Crystal Explorer program. The normalized contact distance ( $d_{\text{norm}}$ ) depends on the atom's  $d_i$  and  $d_e$  (the distance from Hirshfeld surface to the nearest nucleus inside and outside, respectively) as well as the van der Waals radii of the atoms given by the equation (2).

$$d_{norm} = \frac{d_i - r_i^{vdw}}{r_i^{vdw}} + \frac{d_e - r_e^{vdw}}{r_e^{vdw}} \quad (2)$$

Where  $r_i^{vdw}$  and  $r_e^{vdw}$  are the van der Waals radii of the atoms internal and external to the surface, respectively (Figure S7) .

### 1.3. Theoretical Calculations

The electronic structure calculations were performed by first-principles calculation in the CASTEP package, with the norm-conserving pseudopotentials (NCPs).<sup>[5]</sup> The Perdew-Burke-Ernzerhof (PBE) functional within the generalized gradient approximation (GGA) was applied for the exchange-correlation potential.<sup>[6]</sup> The interactions between the core and valence electrons were represented by the norm-conserving pseudopotentials, and the following valence configurations were regarded: C,  $2s^22p^2$ ; N,  $2s^22p^3$ ; H,  $1s^1$ ; F,  $2s^22p^5$ ; S,  $3s^23p^4$ ; O,  $2s^22p^4$ ; P,  $3s^23p^3$ ; B,  $2s^22p^1$ . The kinetic energy cutoffs of **I-1-I-2**, **II-1-II-3**, **III** were set as 750, 850, 850, 600, 830 and 750 eV in the Brillouin zone.<sup>[7]</sup> The Monkhorst–Pack k-point meshes of **I-1-I-2**, **II-1-II-3**, **III** were set as  $6 \times 3 \times 1$ ,  $7 \times 2 \times 5$ ,  $3 \times 3 \times 3$ ,  $2 \times 4 \times 5$ ,  $5 \times 2 \times 2$  and  $4 \times 1 \times 3$ . Because of the discontinuity of exchange-correlation energy, the calculated band gaps by GGA-PBE were usually underestimated. A scissor operator was adopted to shift all the conduction bands to match the calculated band gaps with the measured value for the optical properties calculations. A post-processing tool, namely, the SHG-density was performed to further explore the contribution of atoms or groups to the SHG response based on the SOS method through CASTEP package.<sup>[8-9]</sup>

The orbitals and polarizability anisotropy for  $[C_4H_5N_3]$ ,  $[C_4H_6N_3]^+$ ,  $[H_2PO_4]^-$ ,  $[BF_4]^-$ ,  $[CF_3SO_3]^-$ ,  $[NH_2SO_3]^-$ ,  $[CH_3SO_3]^-$ ,  $[C_4H_6O_4]$  units at the molecular level were calculated using DFT method implemented in the Gaussian09 package<sup>[10]</sup> B3LYP (Becke, three-parameter, Lee-Yang-Parr) exchange-correlation functional<sup>[11]</sup> with the Lee–Yang–S7 Parr correlation functional at the 6-31G(d,p) basis set in Gaussian was being employed.

**Table S1.** Crystal data and structure refinement for **APZ, I-1, I-2, and II-1.**

| Empirical formula                                                         | [APZ] C <sub>4</sub> H <sub>5</sub> N <sub>3</sub>                          | I-1 [(C <sub>4</sub> H <sub>6</sub> N <sub>3</sub> )(H <sub>2</sub> PO <sub>4</sub> )] | I-2 [(C <sub>4</sub> H <sub>6</sub> N <sub>3</sub> )(BF <sub>4</sub> )]      | II-1 [(C <sub>4</sub> H <sub>5</sub> N <sub>3</sub> )(C <sub>4</sub> H <sub>6</sub> N <sub>3</sub> )(CF <sub>3</sub> SO <sub>3</sub> )] |
|---------------------------------------------------------------------------|-----------------------------------------------------------------------------|----------------------------------------------------------------------------------------|------------------------------------------------------------------------------|-----------------------------------------------------------------------------------------------------------------------------------------|
| Formula weight                                                            | 95.11                                                                       | 193.10                                                                                 | 182.93                                                                       | 340.30                                                                                                                                  |
| Temperature [K]                                                           | 298                                                                         | 298                                                                                    | 298                                                                          | 298                                                                                                                                     |
| Crystal system                                                            | monoclinic                                                                  | Orthorhombic                                                                           | Monoclinic                                                                   | Triclinic                                                                                                                               |
| Space group (number)                                                      | <i>P</i> 2 <sub>1</sub> / <i>c</i>                                          | <i>P</i> 2 <sub>1</sub> 2 <sub>1</sub> 2 <sub>1</sub>                                  | <i>P</i> 2 <sub>1</sub> / <i>n</i>                                           | <i>P</i> - $\bar{1}$                                                                                                                    |
| <i>a</i> / Å                                                              | 6.2804(12)                                                                  | 4.4906(4)                                                                              | 4.9961(5)                                                                    | 8.658(3)                                                                                                                                |
| <i>b</i> / Å                                                              | 10.2328(14)                                                                 | 8.7661(11)                                                                             | 20.906(2)                                                                    | 8.791(3)                                                                                                                                |
| <i>c</i> / Å                                                              | 7.3769(12)                                                                  | 19.496(2)                                                                              | 7.0582(6)                                                                    | 9.477(3)                                                                                                                                |
| $\alpha$ / °                                                              | 90                                                                          | 90                                                                                     | 90                                                                           | 71.944(12)                                                                                                                              |
| $\beta$ / °                                                               | 93.117(7)                                                                   | 90                                                                                     | 102.398(3)                                                                   | 81.828(12)                                                                                                                              |
| $\gamma$ / °                                                              | 90                                                                          | 90                                                                                     | 90                                                                           | 83.043(12)                                                                                                                              |
| Volume / Å <sup>3</sup>                                                   | 473.38(14)                                                                  | 767.45(14)                                                                             | 720.03(12)                                                                   | 676.6(4)                                                                                                                                |
| <i>Z</i>                                                                  | 4                                                                           | 4                                                                                      | 4                                                                            | 2                                                                                                                                       |
| $\rho_{\text{calc}}$ / g·cm <sup>-3</sup>                                 | 1.335                                                                       | 1.671                                                                                  | 1.687                                                                        | 1.670                                                                                                                                   |
| $\mu$ / mm <sup>-1</sup>                                                  | 0.091                                                                       | 0.339                                                                                  | 0.178                                                                        | 0.299                                                                                                                                   |
| <i>F</i> (000)                                                            | 200.0                                                                       | 400.0                                                                                  | 368.0                                                                        | 348.0                                                                                                                                   |
| Crystal size/mm <sup>3</sup>                                              | 0.154 × 0.131 × 0.112                                                       | 0.24 × 0.194 × 0.187                                                                   | 0.206 × 0.184 × 0.154                                                        | 0.213 × 0.185 × 0.171                                                                                                                   |
| Radiation                                                                 | Mo K $\alpha$ ( $\lambda$ = 0.71073)                                        | Mo K $\alpha$ ( $\lambda$ = 0.71073)                                                   | Mo K $\alpha$ ( $\lambda$ = 0.71073)                                         | Mo K $\alpha$ ( $\lambda$ = 0.71073)                                                                                                    |
| 2 $\theta$ range (°)                                                      | 6.496 to 50.68                                                              | 6.25 to 55.002                                                                         | 6.224 to 55.156                                                              | 4.548 to 50.68                                                                                                                          |
| Index ranges                                                              | -7 ≤ <i>h</i> ≤ 7, -12 ≤ <i>k</i> ≤ 12, -8 ≤ <i>l</i> ≤ 8                   | -5 ≤ <i>h</i> ≤ 5, -11 ≤ <i>k</i> ≤ 11, -24 ≤ <i>l</i> ≤ 24                            | -6 ≤ <i>h</i> ≤ 6, -27 ≤ <i>k</i> ≤ 27, -9 ≤ <i>l</i> ≤ 9                    | -10 ≤ <i>h</i> ≤ 10, -10 ≤ <i>k</i> ≤ 10, -11 ≤ <i>l</i> ≤ 11                                                                           |
| Reflections collected                                                     | 2736                                                                        | 5621                                                                                   | 17178                                                                        | 8971                                                                                                                                    |
| Independent reflections                                                   | 841 [ <i>R</i> <sub>int</sub> = 0.0645, <i>R</i> <sub>sigma</sub> = 0.0677] | 1727 [ <i>R</i> <sub>int</sub> = 0.0834, <i>R</i> <sub>sigma</sub> = 0.0819]           | 1659 [ <i>R</i> <sub>int</sub> = 0.0975, <i>R</i> <sub>sigma</sub> = 0.0476] | 2462 [ <i>R</i> <sub>int</sub> = 0.0703, <i>R</i> <sub>sigma</sub> = 0.0598]                                                            |
| Completeness                                                              | 96.9 %                                                                      | 98.4 %                                                                                 | 99.7 %                                                                       | 99 %                                                                                                                                    |
| Data / Restraints / Parameters                                            | 841/0/64                                                                    | 1727/2/111                                                                             | 1659/0/109                                                                   | 2462/0/204                                                                                                                              |
| Goodness-of-fit on <i>F</i> <sup>2</sup>                                  | 1.074                                                                       | 1.054                                                                                  | 1.070                                                                        | 1.084                                                                                                                                   |
| Final <i>R</i> indexes [ <i>I</i> ≥ 2 $\sigma$ ( <i>I</i> )] <sup>a</sup> | <i>R</i> <sub>1</sub> = 0.0603, <i>wR</i> <sub>2</sub> = 0.1641             | <i>R</i> <sub>1</sub> = 0.0473, <i>wR</i> <sub>2</sub> = 0.1061                        | <i>R</i> <sub>1</sub> = 0.0476, <i>wR</i> <sub>2</sub> = 0.1237              | <i>R</i> <sub>1</sub> = 0.0494, <i>wR</i> <sub>2</sub> = 0.1292                                                                         |
| Final <i>R</i> indexes [all data] <sup>a</sup>                            | <i>R</i> <sub>1</sub> = 0.0814, <i>wR</i> <sub>2</sub> = 0.1883             | <i>R</i> <sub>1</sub> = 0.0531, <i>wR</i> <sub>2</sub> = 0.1133                        | <i>R</i> <sub>1</sub> = 0.0567, <i>wR</i> <sub>2</sub> = 0.1358              | <i>R</i> <sub>1</sub> = 0.0640, <i>wR</i> <sub>2</sub> = 0.1461                                                                         |
| Largest peak/hole [e·Å <sup>-3</sup> ]                                    | 0.14/-0.14                                                                  | 0.25/-0.32                                                                             | 0.27/-0.29                                                                   | 0.48/-0.41                                                                                                                              |
| Flack X parameter                                                         | /                                                                           | -0.11(15)                                                                              | /                                                                            | /                                                                                                                                       |

<sup>a</sup>*R*<sub>1</sub> =  $\Sigma||F_o| - |F_c|| / \Sigma|F_o|$  and *wR*<sub>2</sub> =  $[\Sigma w(F_o^2 - F_c^2)^2 / \Sigma wF_o^4]^{1/2}$  for *F*<sub>o</sub><sup>2</sup> > 2 $\sigma$ (*F*<sub>o</sub><sup>2</sup>)

**Table S1.** Crystal data and structure refinement for **II-2**, **II-3**, **III**, **IV**.

| Empirical formula                                                         | II-2 [(C <sub>4</sub> H <sub>6</sub> N <sub>3</sub> )(NH <sub>2</sub> SO <sub>3</sub> )] | II-3 [(C <sub>4</sub> H <sub>6</sub> N <sub>3</sub> )(CH <sub>3</sub> SO <sub>3</sub> )] | III [(C <sub>4</sub> H <sub>5</sub> N <sub>3</sub> ) <sub>2</sub> (C <sub>4</sub> H <sub>6</sub> O <sub>4</sub> )] | IV [(C <sub>4</sub> H <sub>5</sub> N <sub>3</sub> )(H <sub>3</sub> BO <sub>3</sub> ) <sub>2</sub> ] |
|---------------------------------------------------------------------------|------------------------------------------------------------------------------------------|------------------------------------------------------------------------------------------|--------------------------------------------------------------------------------------------------------------------|-----------------------------------------------------------------------------------------------------|
| Formula weight                                                            | 192.20                                                                                   | 191.21                                                                                   | 308.31                                                                                                             | 218.78                                                                                              |
| Temperature [K]                                                           | 298                                                                                      | 298                                                                                      | 298                                                                                                                | 298                                                                                                 |
| Crystal system                                                            | Monoclinic                                                                               | Monoclinic                                                                               | Monoclinic                                                                                                         | Monoclinic                                                                                          |
| Space group (number)                                                      | <i>C2/c</i>                                                                              | <i>P2<sub>1</sub>/c</i>                                                                  | <i>P2<sub>1</sub>/c</i>                                                                                            | <i>P2<sub>1</sub>/c</i>                                                                             |
| <i>a</i> / Å                                                              | 23.329(2)                                                                                | 5.1632(8)                                                                                | 5.3958(6)                                                                                                          | 10.2656(14)                                                                                         |
| <i>b</i> / Å                                                              | 8.9732(6)                                                                                | 10.2883(17)                                                                              | 19.471(2)                                                                                                          | 3.7235(5)                                                                                           |
| <i>c</i> / Å                                                              | 7.4927(6)                                                                                | 15.253(3)                                                                                | 6.9453(7)                                                                                                          | 13.2934(19)                                                                                         |
| $\alpha$ / °                                                              | 90                                                                                       | 90                                                                                       | 90                                                                                                                 | 90                                                                                                  |
| $\beta$ / °                                                               | 101.254(3)                                                                               | 93.922(5)                                                                                | 104.630(5)                                                                                                         | 107.188(5)                                                                                          |
| $\gamma$ / °                                                              | 90                                                                                       | 90                                                                                       | 90                                                                                                                 | 90                                                                                                  |
| Volume / Å <sup>3</sup>                                                   | 1538.3(2)                                                                                | 808.4(2)                                                                                 | 706.02(13)                                                                                                         | 485.43(12)                                                                                          |
| <i>Z</i>                                                                  | 8                                                                                        | 4                                                                                        | 2                                                                                                                  | 2                                                                                                   |
| $\rho_{\text{calc}}$ / g·cm <sup>-3</sup>                                 | 1.660                                                                                    | 1.571                                                                                    | 1.450                                                                                                              | 1.497                                                                                               |
| $\mu$ / mm <sup>-1</sup>                                                  | 0.395                                                                                    | 0.372                                                                                    | 0.112                                                                                                              | 0.132                                                                                               |
| <i>F</i> (000)                                                            | 800.0                                                                                    | 400.0                                                                                    | 324.0                                                                                                              | 228.0                                                                                               |
| Crystal size/mm <sup>3</sup>                                              | 0.184 × 0.162 × 0.144                                                                    | 0.185 × 0.141 × 0.12                                                                     | 0.22 × 0.186 × 0.162                                                                                               | 0.154 × 0.132 × 0.112                                                                               |
| Radiation                                                                 | Mo K $\alpha$ ( $\lambda$ = 0.71073)                                                     | Mo K $\alpha$ ( $\lambda$ = 0.71073)                                                     | Mo K $\alpha$ ( $\lambda$ = 0.71073)                                                                               | Mo K $\alpha$ ( $\lambda$ = 0.71073)                                                                |
| 2 $\theta$ range (°)                                                      | 7.012 to 54.944                                                                          | 4.78 to 50.69                                                                            | 4.184 to 55.084                                                                                                    | 4.154 to 50.752                                                                                     |
| Index ranges                                                              | -30 ≤ <i>h</i> ≤ 28, -10 ≤ <i>k</i> ≤ 11, -9 ≤ <i>l</i> ≤ 9                              | -6 ≤ <i>h</i> ≤ 6, -12 ≤ <i>k</i> ≤ 12, -16 ≤ <i>l</i> ≤ 18                              | -7 ≤ <i>h</i> ≤ 7, -25 ≤ <i>k</i> ≤ 25, -9 ≤ <i>l</i> ≤ 9                                                          | -12 ≤ <i>h</i> ≤ 12, -4 ≤ <i>k</i> ≤ 4, -16 ≤ <i>l</i> ≤ 16                                         |
| Reflections collected                                                     | 5566                                                                                     | 4225                                                                                     | 7097                                                                                                               | 3009                                                                                                |
| Independent reflections                                                   | 1730 [ <i>R</i> <sub>int</sub> = 0.0539, <i>R</i> <sub>sigma</sub> = 0.0520]             | 1470 [ <i>R</i> <sub>int</sub> = 0.0495, <i>R</i> <sub>sigma</sub> = 0.0551]             | 1605 [ <i>R</i> <sub>int</sub> = 0.0717, <i>R</i> <sub>sigma</sub> = 0.0526]                                       | 854 [ <i>R</i> <sub>int</sub> = 0.0381, <i>R</i> <sub>sigma</sub> = 0.0375]                         |
| Completeness                                                              | 98.5 %                                                                                   | 99.2 %                                                                                   | 99.6 %                                                                                                             | 95.1 %                                                                                              |
| Data / Restraints / Parameters                                            | 1730/0/110                                                                               | 1470/0/107                                                                               | 1605/0/100                                                                                                         | 854/1/65                                                                                            |
| Goodness-of-fit on <i>F</i> <sup>2</sup>                                  | 1.087                                                                                    | 1.114                                                                                    | 1.034                                                                                                              | 1.180                                                                                               |
| Final <i>R</i> indexes [ <i>I</i> ≥ 2 $\sigma$ ( <i>I</i> )] <sup>a</sup> | <i>R</i> <sub>1</sub> = 0.0392, <i>wR</i> <sub>2</sub> = 0.0980                          | <i>R</i> <sub>1</sub> = 0.0477, <i>wR</i> <sub>2</sub> = 0.0981                          | <i>R</i> <sub>1</sub> = 0.0441, <i>wR</i> <sub>2</sub> = 0.1077                                                    | <i>R</i> <sub>1</sub> = 0.0481, <i>wR</i> <sub>2</sub> = 0.1026                                     |
| Final <i>R</i> indexes [all data] <sup>a</sup>                            | <i>R</i> <sub>1</sub> = 0.0485, <i>wR</i> <sub>2</sub> = 0.1034                          | <i>R</i> <sub>1</sub> = 0.0685, <i>wR</i> <sub>2</sub> = 0.1109                          | <i>R</i> <sub>1</sub> = 0.0628, <i>wR</i> <sub>2</sub> = 0.1264                                                    | <i>R</i> <sub>1</sub> = 0.0554, <i>wR</i> <sub>2</sub> = 0.1061                                     |
| Largest peak/hole [e·Å <sup>-3</sup> ]                                    | 0.27/-0.38                                                                               | 0.22/-0.32                                                                               | 0.31/-0.22                                                                                                         | 0.15/-0.15                                                                                          |

<sup>a</sup>*R*<sub>1</sub> =  $\sum||F_o| - |F_c|| / \sum|F_o|$  and *wR*<sub>2</sub> =  $[\sum w(F_o^2 - F_c^2)^2 / \sum wF_o^4]^{1/2}$  for *F*<sub>o</sub><sup>2</sup> > 2 $\sigma$

**Table S2.** Fractional atomic coordinates ( $\times 10^4$ ) and equivalent isotropic displacement parameters ( $\text{\AA}^2 \times 10^3$ ) for **I-1–I-2**, **II-1–II-3**, **III** and **IV**.  $U_{\text{eq}}$  is defined as 1/3 of the trace of the orthogonalized  $U_{ij}$  tensor.

| <b>I-1 [(C<sub>4</sub>H<sub>6</sub>N<sub>3</sub>)(H<sub>2</sub>PO<sub>4</sub>)]</b>                                            |           |             |            |                                   |
|--------------------------------------------------------------------------------------------------------------------------------|-----------|-------------|------------|-----------------------------------|
| <b>Atom</b>                                                                                                                    | <b>x</b>  | <b>y</b>    | <b>z</b>   | <b><math>U_{\text{eq}}</math></b> |
| P(1)                                                                                                                           | 6377(2)   | 10960.6(10) | 5726.3(5)  | 15.5(3)                           |
| N(1)                                                                                                                           | 7167(8)   | 6686(4)     | 5871.7(18) | 25.7(8)                           |
| N(2)                                                                                                                           | 2017(8)   | 6878(4)     | 7287.9(18) | 25.2(8)                           |
| N(3)                                                                                                                           | 4402(7)   | 4767(3)     | 6403.5(16) | 19.1(7)                           |
| C(1)                                                                                                                           | 5248(9)   | 6236(4)     | 6340.0(18) | 17.9(8)                           |
| C(2)                                                                                                                           | 3939(10)  | 7273(4)     | 6818(2)    | 22.3(8)                           |
| C(3)                                                                                                                           | 1220(11)  | 5368(4)     | 7318(2)    | 24.5(8)                           |
| C(4)                                                                                                                           | 2398(9)   | 4327(5)     | 6879(2)    | 21.7(8)                           |
| O(1)                                                                                                                           | 5185(6)   | 10574(3)    | 4989.2(14) | 23.2(6)                           |
| O(2)                                                                                                                           | 8749(6)   | 9807(3)     | 5896.9(14) | 20.5(6)                           |
| O(3)                                                                                                                           | 3749(6)   | 10798(3)    | 6237.6(13) | 21.8(6)                           |
| O(4)                                                                                                                           | 7419(6)   | 12595(3)    | 5751.2(15) | 20.9(6)                           |
| <b>I-2 [(C<sub>4</sub>H<sub>6</sub>N<sub>3</sub>)(BF<sub>4</sub>)]</b>                                                         |           |             |            |                                   |
| <b>Atom</b>                                                                                                                    | <b>x</b>  | <b>y</b>    | <b>z</b>   | <b><math>U_{\text{eq}}</math></b> |
| B(1)                                                                                                                           | -815(4)   | 4249.2(9)   | 2148(3)    | 35.1(4)                           |
| N(1)                                                                                                                           | 6129(3)   | 4435.2(8)   | 6876(2)    | 48.5(4)                           |
| N(2)                                                                                                                           | 3154(3)   | 3813.3(7)   | 8194.6(19) | 39.2(4)                           |
| N(3)                                                                                                                           | 3352(4)   | 2875.5(8)   | 5539(2)    | 53.8(4)                           |
| C(1)                                                                                                                           | 4699(3)   | 3908.9(8)   | 6893(2)    | 36.0(4)                           |
| C(2)                                                                                                                           | 1706(4)   | 3263.2(9)   | 8229(3)    | 46.1(4)                           |
| C(3)                                                                                                                           | 1828(5)   | 2805.9(10)  | 6917(3)    | 53.4(5)                           |
| C(4)                                                                                                                           | 4707(4)   | 3404.1(9)   | 5535(3)    | 43.6(4)                           |
| F(1)                                                                                                                           | 1716(2)   | 4279.6(6)   | 1656.3(17) | 53.5(3)                           |
| F(3)                                                                                                                           | -453(3)   | 4305.4(8)   | 4127.0(17) | 67.4(4)                           |
| F(2)                                                                                                                           | -2488(3)  | 4738.2(6)   | 1257.0(19) | 63.4(4)                           |
| F(4)                                                                                                                           | -2047(3)  | 3677.7(6)   | 1537(2)    | 71.1(4)                           |
| <b>II-1 [(C<sub>4</sub>H<sub>5</sub>N<sub>3</sub>)(C<sub>4</sub>H<sub>6</sub>N<sub>3</sub>)(CF<sub>3</sub>SO<sub>3</sub>)]</b> |           |             |            |                                   |
| <b>Atom</b>                                                                                                                    | <b>x</b>  | <b>y</b>    | <b>z</b>   | <b><math>U_{\text{eq}}</math></b> |
| S1                                                                                                                             | 7004.0(8) | 3674.7(9)   | -226.9(7)  | 41.4(3)                           |
| N1                                                                                                                             | 12455(3)  | 1944(3)     | 2451(3)    | 52.8(7)                           |
| N2                                                                                                                             | 11340(3)  | 1239(3)     | 4898(3)    | 40.8(6)                           |
| N3                                                                                                                             | 9117(3)   | 3789(3)     | 4195(3)    | 41.0(6)                           |
| N4                                                                                                                             | 6070(3)   | 1801(3)     | -5884(3)   | 51.2(7)                           |
| N5                                                                                                                             | 5407(3)   | 1245(3)     | -3344(2)   | 43.4(6)                           |
| N6                                                                                                                             | 3191(3)   | 3800(3)     | -3785(3)   | 42.9(6)                           |
| C1                                                                                                                             | 11338(3)  | 2224(3)     | 3494(3)    | 36.5(6)                           |
| C2                                                                                                                             | 10215(4)  | 1565(4)     | 5913(3)    | 48.1(7)                           |
| C3                                                                                                                             | 9116(4)   | 2818(4)     | 5604(3)    | 46.2(7)                           |
| C4                                                                                                                             | 10186(3)  | 3509(3)     | 3146(3)    | 41.3(6)                           |
| C5                                                                                                                             | 8501(4)   | 2011(4)     | -5(3)      | 52.1(8)                           |
| C6                                                                                                                             | 5159(3)   | 2157(3)     | -4736(3)   | 34.4(6)                           |
| C7                                                                                                                             | 4545(4)   | 1650(4)     | -2217(3)   | 51.4(8)                           |
| C8                                                                                                                             | 3438(4)   | 2921(4)     | -2403(3)   | 48.8(7)                           |
| C9                                                                                                                             | 4016(3)   | 3458(3)     | -4952(3)   | 39.2(6)                           |
| O1                                                                                                                             | 7711(3)   | 4823(3)     | 223(3)     | 62.7(7)                           |
| O2                                                                                                                             | 5704(3)   | 2947(3)     | 754(2)     | 64.4(7)                           |
| O3                                                                                                                             | 6842(3)   | 4138(3)     | -1786(2)   | 54.2(6)                           |
| F1                                                                                                                             | 8757(3)   | 1393(3)     | 1408(2)    | 97.9(9)                           |



| F2                                                                                                                 | 9845(2)     | 2464(3)    | -797(3)     | 84.1(7)           |
|--------------------------------------------------------------------------------------------------------------------|-------------|------------|-------------|-------------------|
| F3                                                                                                                 | 8119(3)     | 854(3)     | -463(3)     | 82.5(7)           |
| II-2 [(C <sub>4</sub> H <sub>6</sub> N <sub>3</sub> )(NH <sub>2</sub> SO <sub>3</sub> )]                           |             |            |             |                   |
| Atom                                                                                                               | x           | y          | z           | U <sub>(eq)</sub> |
| S(1)                                                                                                               | 5805.3(2)   | 3354.8(5)  | 4169.8(6)   | 24.7(2)           |
| N(1)                                                                                                               | 5870.7(8)   | 8998.7(18) | 3305(2)     | 35.3(4)           |
| N(2)                                                                                                               | 7148.5(9)   | 9136(2)    | 6881(2)     | 40.5(5)           |
| N(3)                                                                                                               | 6454.8(7)   | 7093.2(17) | 4775(2)     | 29.9(4)           |
| N(4)                                                                                                               | 5280.6(7)   | 3061.4(18) | 5318(2)     | 29.7(4)           |
| C(1)                                                                                                               | 6325.7(9)   | 8542(2)    | 4516(3)     | 27.6(4)           |
| C(2)                                                                                                               | 6707.3(9)   | 9555(2)    | 5632(3)     | 33.2(5)           |
| C(3)                                                                                                               | 7245.3(10)  | 7649(3)    | 7115(3)     | 40.6(5)           |
| C(4)                                                                                                               | 6905.8(10)  | 6628(2)    | 6076(3)     | 35.5(5)           |
| O(1)                                                                                                               | 5714.2(7)   | 4819.5(14) | 3304.6(19)  | 35.0(4)           |
| O(2)                                                                                                               | 5730.0(7)   | 2170.3(15) | 2824.2(19)  | 34.1(4)           |
| O(3)                                                                                                               | 6340.2(6)   | 3271.6(16) | 5495.1(19)  | 36.6(4)           |
| II-3 [(C <sub>4</sub> H <sub>6</sub> N <sub>3</sub> )(CH <sub>3</sub> SO <sub>3</sub> )]                           |             |            |             |                   |
| Atom                                                                                                               | x           | y          | z           | U <sub>(eq)</sub> |
| S(1)                                                                                                               | -4380.9(15) | 6204.1(8)  | 6508.5(5)   | 38.0(3)           |
| N(1)                                                                                                               | 2064(5)     | 7984(3)    | 8201.9(19)  | 49.4(8)           |
| N(2)                                                                                                               | 1060(5)     | 5797(3)    | 8284.4(16)  | 39.8(7)           |
| N(3)                                                                                                               | -2820(5)    | 6346(3)    | 9350.7(18)  | 46.5(7)           |
| C(1)                                                                                                               | 647(6)      | 7042(3)    | 8493(2)     | 37.0(7)           |
| C(2)                                                                                                               | -382(7)     | 4822(3)    | 8593(2)     | 44.3(8)           |
| C(3)                                                                                                               | -2292(7)    | 5099(4)    | 9118(2)     | 47.2(9)           |
| C(4)                                                                                                               | -1413(5)    | 7264(2)    | 9052.4(15)  | 42.7(8)           |
| C(5)                                                                                                               | -6494(5)    | 6504(2)    | 5596.8(15)  | 43.4(8)           |
| O(1)                                                                                                               | -2036(4)    | 5667(3)    | 6183.4(17)  | 57.2(7)           |
| O(2)                                                                                                               | -4004(5)    | 7438(2)    | 6959.6(17)  | 60.6(8)           |
| O(3)                                                                                                               | -5668(5)    | 5247(2)    | 7040.2(15)  | 49.8(7)           |
| III [(C <sub>4</sub> H <sub>5</sub> N <sub>3</sub> ) <sub>2</sub> (C <sub>4</sub> H <sub>6</sub> O <sub>4</sub> )] |             |            |             |                   |
| Atom                                                                                                               | x           | y          | z           | U <sub>(eq)</sub> |
| N(1)                                                                                                               | 8073(2)     | 554.4(7)   | 6351(2)     | 27.7(4)           |
| N(2)                                                                                                               | 3985(2)     | 880.8(7)   | 4691(2)     | 22.6(3)           |
| N(3)                                                                                                               | 5323(3)     | 2249.0(7)  | 5545(2)     | 26.3(3)           |
| C(1)                                                                                                               | 6340(3)     | 1055.3(8)  | 5738(2)     | 20.7(4)           |
| C(2)                                                                                                               | 2326(3)     | 1395.8(9)  | 4082(3)     | 26.2(4)           |
| C(3)                                                                                                               | 2955(3)     | 2072.9(9)  | 4490(3)     | 28.0(4)           |
| C(4)                                                                                                               | 6988(3)     | 1752.6(8)  | 6168(3)     | 23.2(4)           |
| C(5)                                                                                                               | 4903(3)     | 989.7(8)   | 10179(2)    | 21.2(4)           |
| C(6)                                                                                                               | 5893(3)     | 266.4(8)   | 10591(2)    | 22.9(4)           |
| O(1)                                                                                                               | 6597(2)     | 1445.4(6)  | 11095.8(19) | 28.3(3)           |
| O(2)                                                                                                               | 2803(2)     | 1137.5(6)  | 9145.7(19)  | 28.8(3)           |
| IV [(C <sub>4</sub> H <sub>5</sub> N <sub>3</sub> )(H <sub>3</sub> BO <sub>3</sub> ) <sub>2</sub> ]                |             |            |             |                   |
| Atom                                                                                                               | x           | y          | z           | U <sub>(eq)</sub> |
| B(1)                                                                                                               | 9042(3)     | 7603(8)    | 3595(2)     | 32.6(7)           |
| N(1)                                                                                                               | 4445.5(14)  | 7524(4)    | 3084.4(11)  | 51.4(13)          |
| N(2)                                                                                                               | 6029.7(14)  | 5889(4)    | 4566.4(11)  | 44.3(6)           |
| C(1)                                                                                                               | 4721.5(14)  | 6410(4)    | 4036.2(11)  | 42.6(7)           |
| C(2)                                                                                                               | 6300.8(14)  | 4499(4)    | 5520.7(11)  | 44.8(7)           |
| O(1)                                                                                                               | 8323.8(18)  | 5818(5)    | 2721.2(13)  | 44.3(6)           |
| O(2)                                                                                                               | 10341.2(16) | 8704(5)    | 3712.1(12)  | 40.1(6)           |
| O(3)                                                                                                               | 8474.5(17)  | 8305(5)    | 4379.5(13)  | 44.2(6)           |

**Table S3.** Bond lengths and bond angles for **I-1–I-2, II-1–II-3, III** and **IV**.

| <b>I-1 [(C<sub>4</sub>H<sub>6</sub>N<sub>3</sub>)(H<sub>2</sub>PO<sub>4</sub>)]</b>                                            |            |                |            |
|--------------------------------------------------------------------------------------------------------------------------------|------------|----------------|------------|
| P(1)-O(1)                                                                                                                      | 1.570(3)   | N(2)-C(3)      | 1.373(5)   |
| P(1)-O(2)                                                                                                                      | 1.506(3)   | N(3)-C(1)      | 1.349(5)   |
| P(1)-O(3)                                                                                                                      | 1.551(3)   | N(3)-C(4)      | 1.348(5)   |
| P(1)-O(4)                                                                                                                      | 1.508(3)   | C(1)-C(2)      | 1.428(5)   |
| N(1)-C(1)                                                                                                                      | 1.316(5)   | C(3)-C(4)      | 1.358(6)   |
| N(2)-C(2)                                                                                                                      | 1.305(5)   |                |            |
| O(2)-P(1)-(O1)                                                                                                                 | 107.36(15) | C(4)-N(3)-C(1) | 121.6(3)   |
| O(2)-P(1)-(O3)                                                                                                                 | 109.54(16) | N(1)-C(1)-N(3) | 122.3(4)   |
| O(2)-P(1)-(O4)                                                                                                                 | 114.28(17) | N(1)-C(1)-C(2) | 122.1(3)   |
| O(3)-P(1)-(O1)                                                                                                                 | 108.01(16) | N(3)-C(1)-C(2) | 115.6(3)   |
| O(4)-P(1)-(O1)                                                                                                                 | 109.88(15) | N(2)-C(2)-C(1) | 124.1(4)   |
| O(4)-P(1)-(O3)                                                                                                                 | 107.62(16) | C(4)-C(3)-N(2) | 121.3(4)   |
| C(2)-N(2)-C(3)                                                                                                                 | 117.2(3)   | N(3)-C(4)-C(3) | 120.1(4)   |
| <b>I-2 [(C<sub>4</sub>H<sub>6</sub>N<sub>3</sub>)(BF<sub>4</sub>)]</b>                                                         |            |                |            |
| B(1)-F(1)                                                                                                                      | 1.383(2)   | N(2)-C(2)      | 1.362(2)   |
| B(1)-F(3)                                                                                                                      | 1.374(2)   | N(3)-C(3)      | 1.366(3)   |
| B(1)-F(2)                                                                                                                      | 1.383(2)   | N(3)-C(4)      | 1.296(2)   |
| B(1)-F(4)                                                                                                                      | 1.370(2)   | C(1)-C(4)      | 1.426(2)   |
| N(1)-C(1)                                                                                                                      | 1.314(2)   | C(2)-C(3)      | 1.341(3)   |
| N(2)-C(1)                                                                                                                      | 1.336(2)   |                |            |
| F(1)-B(1)-F(2)                                                                                                                 | 110.34(14) | C(4)-N(3)-C(3) | 117.61(16) |
| F(3)-B(1)-F(1)                                                                                                                 | 108.86(15) | N(1)-C(1)-N(2) | 121.83(15) |
| F(3)-B(1)-F(2)                                                                                                                 | 109.50(15) | N(1)-C(1)-C(4) | 122.24(16) |
| F(4)-B(1)-F(1)                                                                                                                 | 109.52(14) | N(2)-C(1)-C(4) | 115.92(16) |
| F(4)-B(1)-F(3)                                                                                                                 | 110.28(15) | C(3)-C(2)-N(2) | 119.13(17) |
| F(4)-B(1)-F(2)                                                                                                                 | 108.34(15) | C(2)-C(3)-N(3) | 122.04(18) |
| C(1)-N(2)-C(2)                                                                                                                 | 121.75(15) | N(3)-C(4)-C(1) | 123.54(16) |
| <b>II-1 [(C<sub>4</sub>H<sub>5</sub>N<sub>3</sub>)(C<sub>4</sub>H<sub>6</sub>N<sub>3</sub>)(CF<sub>3</sub>SO<sub>3</sub>)]</b> |            |                |            |
| S(1)-C(5)                                                                                                                      | 1.814(3)   | N(5)-C(7)      | 1.330(4)   |
| S(1)-O(1)                                                                                                                      | 1.438(3)   | N(6)-C(8)      | 1.331(4)   |
| S(1)-O(2)                                                                                                                      | 1.431(2)   | N(6)-C(9)      | 1.324(4)   |
| S(1)-O(3)                                                                                                                      | 1.429(2)   | C(1)-C(4)      | 1.403(4)   |
| N(1)-C(1)                                                                                                                      | 1.340(4)   | C(2)-C(3)      | 1.353(4)   |
| N(2)-C(1)                                                                                                                      | 1.344(3)   | C(5)-F(1)      | 1.319(4)   |
| N(2)-C(2)                                                                                                                      | 1.339(4)   | C(5)-F(2)      | 1.325(4)   |
| N(3)-C(3)                                                                                                                      | 1.344(4)   | C(5)-F(3)      | 1.315(4)   |
| N(3)-C(4)                                                                                                                      | 1.319(4)   | C(6)-C(9)      | 1.403(4)   |
| N(4)-C(6)                                                                                                                      | 1.346(3)   | C(7)-C(8)      | 1.365(4)   |
| N(5)-C(6)                                                                                                                      | 1.346(3)   |                |            |
| O(1)-S(1)-C(5)                                                                                                                 | 102.73(16) | N(3)-C(3)-C(2) | 118.9(3)   |
| O(2)-S(1)-C(5)                                                                                                                 | 102.30(15) | N(3)-C(4)-C(1) | 120.6(3)   |
| O(2)-S(1)-O(1)                                                                                                                 | 116.07(16) | F(1)-C(5)-S(1) | 110.8(2)   |
| O(3)-S(1)-C(5)                                                                                                                 | 102.93(14) | F(1)-C(5)-F(2) | 108.0(3)   |
| O(3)-S(1)-O(1)                                                                                                                 | 114.09(15) | F(2)-C(5)-S(1) | 111.7(2)   |
| O(3)-S(1)-O(2)                                                                                                                 | 115.87(15) | F(3)-C(5)-S(1) | 112.4(2)   |
| C(2)-N(2)-C(1)                                                                                                                 | 116.6(2)   | F(3)-C(5)-F(1) | 107.9(3)   |

|                |          |                |          |
|----------------|----------|----------------|----------|
| C(4)-N(3)-C(3) | 119.6(2) | F(3)-C(5)-F(2) | 105.8(3) |
| C(7)-N(5)-C(6) | 117.2(2) | N(4)-C(6)-N(5) | 117.7(2) |
| C(9)-N(6)-C(8) | 120.5(2) | N(4)-C(6)-C(9) | 122.2(2) |
| N(1)-C(1)-N(2) | 118.3(2) | N(5)-C(6)-C(9) | 120.1(2) |
| N(1)-C(1)-C(4) | 121.4(3) | N(5)-C(7)-C(8) | 123.6(3) |
| N(2)-C(1)-C(4) | 120.2(2) | N(6)-C(8)-C(7) | 118.6(3) |
| N(2)-C(2)-C(3) | 124.0(3) | N(6)-C(9)-C(6) | 120.0(3) |

### II-2 [(C<sub>4</sub>H<sub>6</sub>N<sub>3</sub>)(NH<sub>2</sub>SO<sub>3</sub>)]

|                |            |                |            |
|----------------|------------|----------------|------------|
| S(1)-N(4)      | 1.6487(16) | N(2)-C(3)      | 1.358(3)   |
| S(1)-O(1)      | 1.4625(13) | N(3)-C(1)      | 1.340(2)   |
| S(1)-O(2)      | 1.4519(13) | N(3)-C(4)      | 1.353(3)   |
| S(1)-O(3)      | 1.4371(15) | C(1)-C(2)      | 1.424(3)   |
| N(1)-C(1)      | 1.320(3)   | C(3)-C(4)      | 1.353(3)   |
| N(2)-C(2)      | 1.304(3)   |                |            |
| O(1)-S(1)-N(4) | 108.45(8)  | C(1)-N(3)-C(4) | 121.64(17) |
| O(2)-S(1)-N(4) | 104.12(8)  | N(1)-C(1)-N(3) | 121.92(18) |
| O(2)-S(1)-O(1) | 111.26(8)  | N(1)-C(1)-C(2) | 122.14(18) |
| O(3)-S(1)-N(4) | 105.32(9)  | N(3)-C(1)-C(2) | 115.94(18) |
| O(3)-S(1)-O(1) | 112.61(8)  | N(2)-C(2)-C(1) | 123.52(19) |
| O(3)-S(1)-O(2) | 114.38(9)  | C(4)-C(3)-N(2) | 121.8(2)   |
| C(2)-N(2)-C(3) | 117.64(18) | N(3)-C(4)-C(3) | 119.41(19) |

### II-3 [(C<sub>4</sub>H<sub>6</sub>N<sub>3</sub>)(CH<sub>3</sub>SO<sub>3</sub>)]

|                |            |                |          |
|----------------|------------|----------------|----------|
| S(1)-C(5)      | 1.736(3)   | N(2)-C(2)      | 1.354(4) |
| S(1)-O(1)      | 1.449(2)   | N(3)-C(3)      | 1.364(4) |
| S(1)-O(2)      | 1.450(2)   | N(3)-C(4)      | 1.294(4) |
| S(1)-O(3)      | 1.464(2)   | C(1)-C(4)      | 1.427(4) |
| N(1)-C(1)      | 1.310(4)   | C(2)-C(3)      | 1.343(5) |
| N(2)-C(1)      | 1.340(4)   |                |          |
| O(1)-S(1)-C(5) | 106.73(14) | C(4)-N(3)-C(3) | 117.9(3) |
| O(1)-S(1)-O(2) | 114.07(16) | N(1)-C(1)-N(2) | 121.7(3) |
| O(1)-S(1)-O(3) | 110.79(14) | N(1)-C(1)-C(4) | 122.7(3) |
| O(2)-S(1)-C(5) | 106.31(15) | N(2)-C(1)-C(4) | 115.6(3) |
| O(2)-S(1)-O(3) | 112.15(15) | C(3)-C(2)-N(2) | 119.6(3) |
| O(3)-S(1)-C(5) | 106.22(13) | C(2)-C(3)-N(3) | 121.6(3) |
| C(1)-N(2)-C(2) | 121.7(3)   | N(3)-C(4)-C(1) | 123.6(3) |

### III [(C<sub>4</sub>H<sub>5</sub>N<sub>3</sub>)<sub>2</sub>(C<sub>4</sub>H<sub>6</sub>O<sub>4</sub>)]

|                |            |                  |            |
|----------------|------------|------------------|------------|
| N(1)-C(1)      | 1.344(2)   | C(2)-C(3)        | 1.373(2)   |
| N(2)-C(1)      | 1.339(2)   | C(5)-C(6)        | 1.508(2)   |
| N(2)-C(2)      | 1.340(2)   | C(5)-O(1)        | 1.3169(19) |
| N(3)-C(3)      | 1.347(2)   | C(5)-O(2)        | 1.2126(19) |
| N(3)-C(4)      | 1.316(2)   | C(6)-C(6)#1      | 1.510(3)   |
| C(1)-C(4)      | 1.415(2)   |                  |            |
| C(1)-N(2)-C(2) | 116.64(14) | N(3)-C(3)-C(2)   | 120.53(16) |
| C(4)-N(3)-C(3) | 117.83(15) | N(3)-C(4)-C(1)   | 121.56(15) |
| N(1)-C(1)-C(4) | 120.95(14) | O(1)-C(5)-C(6)   | 111.60(13) |
| N(2)-C(1)-N(1) | 118.49(15) | O(2)-C(5)-C(6)   | 124.56(15) |
| N(2)-C(1)-C(4) | 120.56(14) | O(2)-C(5)-O(1)   | 123.83(15) |
| N(2)-C(2)-C(3) | 122.88(15) | C(5)-C(6)-C(6)#1 | 113.06(16) |

---

Symmetry transformations used to generate equivalent atoms:

#1 1-X,-Y, 2-Z

---

| <b>IV [(C<sub>4</sub>H<sub>5</sub>N<sub>3</sub>)(H<sub>3</sub>BO<sub>3</sub>)<sub>2</sub>]</b> |          |                  |            |
|------------------------------------------------------------------------------------------------|----------|------------------|------------|
| B(1)-O(1)                                                                                      | 1.353(3) | N(2)-C(1)        | 1.3336     |
| B(1)-O(2)                                                                                      | 1.359(3) | N(2)-C(2)        | 1.3213     |
| B(1)-O(3)                                                                                      | 1.362(3) | C(1)-C(2)#1      | 1.389(3)   |
| N(1)-C(1)                                                                                      | 1.2811   |                  |            |
| O(1)-B(1)-O(2)                                                                                 | 120.9(2) | N(1)-C(1)-N(2)   | 117.6      |
| O(1)-B(1)-O(3)                                                                                 | 120.3(2) | N(1)-C(1)-C(2)#1 | 121.57(12) |
| O(2)-B(1)-O(3)                                                                                 | 118.8(2) | N(2)-C(1)-C(2)#1 | 120.63(12) |
| C(2)-N(2)-C(1)                                                                                 | 117.3    | N(2)-C(2)-C(1)#1 | 122.11(12) |

---

Symmetry transformations used to generate equivalent atoms:

#1 1-X,1-Y, 1-Z

---

**Table S4.** Hydrogen atom coordinates ( $\text{\AA} \times 10^4$ ) and isotropic displacement parameter ( $\text{\AA}^2 \times 10^3$ ) for **I-1–I-2**, **II-1–II-3**, **III** and **IV**.

| <b>I-1 [(C<sub>4</sub>H<sub>6</sub>N<sub>3</sub>)(H<sub>2</sub>PO<sub>4</sub>)]</b>                                            |          |          |           |                         |
|--------------------------------------------------------------------------------------------------------------------------------|----------|----------|-----------|-------------------------|
| <b>Atom</b>                                                                                                                    | <b>x</b> | <b>y</b> | <b>z</b>  | <b>U<sub>(eq)</sub></b> |
| H(1A)                                                                                                                          | 7946.24  | 6018.13  | 5586.31   | 31                      |
| H(1B)                                                                                                                          | 7671.74  | 7653.73  | 5844.01   | 31                      |
| H(3)                                                                                                                           | 5177.47  | 4077.61  | 6127.94   | 23                      |
| H(2)                                                                                                                           | 4502.26  | 8315.96  | 6792.09   | 27                      |
| H(3A)                                                                                                                          | -182.39  | 5044.28  | 7652.19   | 29                      |
| H(4)                                                                                                                           | 1807.76  | 3288.6   | 6906.79   | 26                      |
| H(3B)                                                                                                                          | 1859.33  | 10373.79 | 6147.5    | 70(20)                  |
| H(4A)                                                                                                                          | 8427.92  | 13251.74 | 5436.23   | 200(50)                 |
| <b>I-2 [(C<sub>4</sub>H<sub>6</sub>N<sub>3</sub>)(BF<sub>4</sub>)]</b>                                                         |          |          |           |                         |
| <b>Atom</b>                                                                                                                    | <b>x</b> | <b>y</b> | <b>z</b>  | <b>U<sub>(eq)</sub></b> |
| H(1A)                                                                                                                          | 6087.56  | 4730.02  | 7718.73   | 58                      |
| H(1B)                                                                                                                          | 7107.46  | 4485.02  | 6021.83   | 58                      |
| H(2)                                                                                                                           | 3072.78  | 4106.88  | 9033.62   | 47                      |
| H(2A)                                                                                                                          | 646.34   | 3205.4   | 9149.25   | 55                      |
| H(3)                                                                                                                           | 844.9    | 2429.7   | 6947.84   | 64                      |
| H(4)                                                                                                                           | 5741.08  | 3456.98  | 4596.42   | 52                      |
| <b>II-1 [(C<sub>4</sub>H<sub>5</sub>N<sub>3</sub>)(C<sub>4</sub>H<sub>6</sub>N<sub>3</sub>)(CF<sub>3</sub>SO<sub>3</sub>)]</b> |          |          |           |                         |
| <b>Atom</b>                                                                                                                    | <b>x</b> | <b>y</b> | <b>z</b>  | <b>U<sub>(eq)</sub></b> |
| H(1A)                                                                                                                          | 12886.19 | 982.75   | 2779.91   | 63                      |
| H(1B)                                                                                                                          | 12039.19 | 2029.95  | 1651.81   | 63                      |
| H(4A)                                                                                                                          | 6324.7   | 784.25   | -5632.11  | 61                      |
| H(4B)                                                                                                                          | 5561.2   | 2069.15  | -6652.51  | 61                      |
| H(6)                                                                                                                           | 2489.9   | 4597.55  | -3921.06  | 52                      |
| H(2)                                                                                                                           | 10185.58 | 888.29   | 6887.78   | 58                      |
| H(3)                                                                                                                           | 8371.3   | 3003.85  | 6355.11   | 70(11)                  |
| H(4)                                                                                                                           | 10176.77 | 4169.79  | 2167.72   | 50                      |
| H(7)                                                                                                                           | 4704.59  | 1033.65  | -1248.12  | 62                      |
| H(8)                                                                                                                           | 2868.82  | 3165.44  | -1581.75  | 59                      |
| H(9)                                                                                                                           | 3840(40) | 4090(40) | -5960(40) | 51(9)                   |
| <b>II-2 [(C<sub>4</sub>H<sub>6</sub>N<sub>3</sub>)(NH<sub>2</sub>SO<sub>3</sub>)]</b>                                          |          |          |           |                         |
| <b>Atom</b>                                                                                                                    | <b>x</b> | <b>y</b> | <b>z</b>  | <b>U<sub>(eq)</sub></b> |
| H(1A)                                                                                                                          | 5641.93  | 8344.63  | 2639.48   | 42                      |
| H(1B)                                                                                                                          | 5796.23  | 9957.53  | 3163.68   | 42                      |
| H(3)                                                                                                                           | 6241.01  | 6427.45  | 4081.77   | 36                      |
| H(4A)                                                                                                                          | 4984.83  | 2819.26  | 4665.12   | 45                      |
| H(4B)                                                                                                                          | 5262.33  | 3755.26  | 5995.72   | 45                      |
| H(2)                                                                                                                           | 6636.71  | 10592.89 | 5457.51   | 40                      |
| H(3A)                                                                                                                          | 7559.75  | 7317.28  | 8031.99   | 49                      |
| H(4)                                                                                                                           | 6983.38  | 5594.38  | 6259.02   | 43                      |
| <b>II-3 [(C<sub>4</sub>H<sub>6</sub>N<sub>3</sub>)(CH<sub>3</sub>SO<sub>3</sub>)]</b>                                          |          |          |           |                         |
| <b>Atom</b>                                                                                                                    | <b>x</b> | <b>y</b> | <b>z</b>  | <b>U<sub>(eq)</sub></b> |
| H(1A)                                                                                                                          | 3295.78  | 7811.23  | 7868.33   | 59                      |
| H(1B)                                                                                                                          | 1761.68  | 8775.73  | 8344.73   | 59                      |
| H(2)                                                                                                                           | 2273.57  | 5613.69  | 7945.38   | 48                      |
| H(2A)                                                                                                                          | -51.03   | 3964.24  | 8443.19   | 53                      |
| H(3)                                                                                                                           | -3278.14 | 4424.89  | 9327.62   | 57                      |
| H(4)                                                                                                                           | -1762.19 | 8116.1   | 9211.2    | 51                      |
| H(5A)                                                                                                                          | -6829.59 | 5708.9   | 5280.2    | 65                      |
| H(5B)                                                                                                                          | -5725.69 | 7123.3   | 5221.5    | 65                      |
| H(5C)                                                                                                                          | -8094.59 | 6847     | 5784.4    | 65                      |

| <b>III [(C<sub>4</sub>H<sub>5</sub>N<sub>3</sub>)<sub>2</sub>(C<sub>4</sub>H<sub>6</sub>O<sub>4</sub>)]</b> |          |          |          |                         |
|-------------------------------------------------------------------------------------------------------------|----------|----------|----------|-------------------------|
| <b>Atom</b>                                                                                                 | <b>x</b> | <b>y</b> | <b>z</b> | <b>U<sub>(eq)</sub></b> |
| H(1A)                                                                                                       | 7648.88  | 123.23   | 6061.78  | 33                      |
| H(1B)                                                                                                       | 9632.18  | 657.63   | 7041.68  | 33                      |
| H(2)                                                                                                        | 639.98   | 1287.83  | 3334.81  | 31                      |
| H(3)                                                                                                        | 1710.61  | 2419.88  | 4024.13  | 34                      |
| H(4)                                                                                                        | 8664.62  | 1865.23  | 6924.74  | 28                      |
| H(6A)                                                                                                       | 6155.74  | 168.44   | 12027.7  | 27                      |
| H(6B)                                                                                                       | 7576.24  | 230.34   | 10273.4  | 27                      |
| H(1)                                                                                                        | 6010.04  | 1842.73  | 10815.06 | 42                      |
| <b>IV [(C<sub>4</sub>H<sub>5</sub>N<sub>3</sub>)(H<sub>3</sub>BO<sub>3</sub>)<sub>2</sub>]</b>              |          |          |          |                         |
| <b>Atom</b>                                                                                                 | <b>x</b> | <b>y</b> | <b>z</b> | <b>U<sub>(eq)</sub></b> |
| H(1A)                                                                                                       | 5100.89  | 7911.68  | 2806.5   | 62                      |
| H(1B)                                                                                                       | 3602.69  | 7892.18  | 2715.9   | 62                      |
| H(1C)                                                                                                       | 4485.29  | 7597.28  | 3464.7   | 62                      |
| H(2)                                                                                                        | 7214.99  | 4113.18  | 5912.3   | 54                      |
| H(1)                                                                                                        | 8826.42  | 5367.85  | 2349.57  | 66                      |
| H(2A)                                                                                                       | 10664.43 | 9602.88  | 4305.11  | 60                      |
| H(3)                                                                                                        | 7734.8   | 7235.53  | 4258.43  | 66                      |

**Table S5.** Hydrogen Bonds for **I-1–I-2**, **II-1–II-3**, **III** and **IV**.

| <b>I-1 [(C<sub>4</sub>H<sub>6</sub>N<sub>3</sub>)(H<sub>2</sub>PO<sub>4</sub>)]</b> |                            |                              |                            |                  |
|-------------------------------------------------------------------------------------|----------------------------|------------------------------|----------------------------|------------------|
| <b>D–H...A</b>                                                                      | <b>d<sub>D–H</sub> (Å)</b> | <b>d<sub>H...A</sub> (Å)</b> | <b>d<sub>D–A</sub> (Å)</b> | <b>D–H–A (°)</b> |
| N(1)–H(1A)···O(1)#1                                                                 | 0.88                       | 2.05                         | 2.929(4)                   | 172.7            |
| N(1)–H(1B)···O(2)                                                                   | 0.88                       | 1.95                         | 2.828(4)                   | 173.4            |
| N(3)–H(3)···O(4)#2                                                                  | 0.88                       | 1.80                         | 2.660(4)                   | 164.9            |
| C(2)–H(2)···O(3)                                                                    | 0.95                       | 2.45                         | 3.292(5)                   | 147.2            |
| O(3)–H(3B)···O(2)#3                                                                 | 0.94                       | 1.56                         | 2.497(4)                   | 171.5            |
| O(4)–H(4A)···O(1)#4                                                                 | 0.96                       | 1.54                         | 2.490(4)                   | 172.6            |

Symmetry transformations used to generate equivalent atoms:

#1 1/2+X,3/2-Y,1-Z; #2 +X,-1+Y,+Z; #3 -1+X,+Y,+Z; #4 1/2+X,5/2-Y,1-Z

| <b>I-2 [(C<sub>4</sub>H<sub>6</sub>N<sub>3</sub>)(BF<sub>4</sub>)]</b> |                            |                              |                            |                  |
|------------------------------------------------------------------------|----------------------------|------------------------------|----------------------------|------------------|
| <b>D–H...A</b>                                                         | <b>d<sub>D–H</sub> (Å)</b> | <b>d<sub>H...A</sub> (Å)</b> | <b>d<sub>D–A</sub> (Å)</b> | <b>D–H–A (°)</b> |
| N(1)–H(1A)···F(1)#1                                                    | 0.86                       | 2.34                         | 2.995(2)                   | 133.2            |
| N(1)–H(1A)···F(2)#2                                                    | 0.86                       | 2.36                         | 3.010(2)                   | 133.1            |
| N(1)–H(1A)···F(2)#3                                                    | 0.86                       | 2.45                         | 3.086(2)                   | 131.8            |
| N(1)–H(1B)···F(3)#4                                                    | 0.86                       | 2.03                         | 2.859(2)                   | 162.2            |
| N(2)–H(2)···F(1)#5                                                     | 0.86                       | 2.13                         | 2.8619(17)                 | 142.1            |
| N(2)–H(2)···F(2)#2                                                     | 0.86                       | 2.44                         | 3.080(2)                   | 132.2            |
| N(2)–H(2)···F(4)#3                                                     | 0.86                       | 2.83                         | 2.994(2)                   | 92.4             |
| C(2)–H(2A)···F(1)#5                                                    | 0.93                       | 2.84                         | 3.219(2)                   | 105.9            |
| C(3)–H(3)···F(4)#6                                                     | 0.93                       | 2.59                         | 3.174(2)                   | 121.7            |

Symmetry transformations used to generate equivalent atoms:

#11-X,1-Y,1-Z; #2 -X,1-Y,1-Z; #3 1+X,+Y,1+Z; #4 1+X,+Y,+Z; #5 +X,+Y,1+Z;

#6 1/2+X,1/2-Y,1/2+Z

| <b>II-1 [(C<sub>4</sub>H<sub>5</sub>N<sub>3</sub>)(C<sub>4</sub>H<sub>6</sub>N<sub>3</sub>)(CF<sub>3</sub>SO<sub>3</sub>)]</b> |                            |                              |                            |                  |
|--------------------------------------------------------------------------------------------------------------------------------|----------------------------|------------------------------|----------------------------|------------------|
| <b>D–H...A</b>                                                                                                                 | <b>d<sub>D–H</sub> (Å)</b> | <b>d<sub>H...A</sub> (Å)</b> | <b>d<sub>D–A</sub> (Å)</b> | <b>D–H–A (°)</b> |
| N(1)–H(1A)···N(5)#1                                                                                                            | 0.86                       | 2.28                         | 3.118(3)                   | 165.2            |
| N(1)–H(1B)···O(1)#2                                                                                                            | 0.86                       | 2.80                         | 3.172(4)                   | 107.7            |
| N(4)–H(4A)···N(2)#1                                                                                                            | 0.86                       | 2.55                         | 3.262(4)                   | 140.9            |
| N(4)–H(4B)···O(2)#3                                                                                                            | 0.86                       | 2.33                         | 3.080(4)                   | 146.5            |
| N(6)–H(6)···N(3)#4                                                                                                             | 0.86                       | 1.85                         | 2.705(3)                   | 176.1            |
| C(2)–H(2)···F(1)#5                                                                                                             | 0.93                       | 2.33                         | 3.161(4)                   | 148.3            |
| C(8)–H(8)···O(1)#4                                                                                                             | 0.93                       | 2.46                         | 3.266(4)                   | 145.2            |
| C(8)–H(8)···F(2)#6                                                                                                             | 0.93                       | 2.71                         | 3.277(4)                   | 120.1            |
| C(9)–H(9)···O(3)#7                                                                                                             | 0.97(3)                    | 2.32(3)                      | 3.286(4)                   | 171(3)           |

Symmetry transformations used to generate equivalent atoms:

#1 2-X,-Y,-Z; ; #2 2-X,1-Y,-Z; #3 +X,+Y,-1+Z; #4 1-X,1-Y,-Z; #5 2-X,-Y,1-Z; #6 1-X,1-Y,1-Z;

#7 1-X,1-Y,-1-Z

| <b>II-2 [(C<sub>4</sub>H<sub>6</sub>N<sub>3</sub>)(NH<sub>2</sub>SO<sub>3</sub>)]</b> |                            |                              |                            |                  |
|---------------------------------------------------------------------------------------|----------------------------|------------------------------|----------------------------|------------------|
| <b>D–H...A</b>                                                                        | <b>d<sub>D–H</sub> (Å)</b> | <b>d<sub>H...A</sub> (Å)</b> | <b>d<sub>D–A</sub> (Å)</b> | <b>D–H–A (°)</b> |
| N(1)–H(1A)···N(4)#1                                                                   | 0.88                       | 2.18                         | 3.020(2)                   | 159.3            |
| N(1)–H(1A)···O(3)#1                                                                   | 0.88                       | 2.89                         | 3.269(2)                   | 107.7            |
| N(1)–H(1B)···O(2)#2                                                                   | 0.88                       | 2.00                         | 2.879(2)                   | 173.0            |
| N(3)–H(3)···O(1)                                                                      | 0.88                       | 1.91                         | 2.760(2)                   | 161.6            |
| N(3)–H(3)···O(3)#1                                                                    | 0.88                       | 2.76                         | 3.183(2)                   | 111.3            |
| N(4)–H(4A)···O(2)#3                                                                   | 0.79                       | 2.32                         | 3.094(2)                   | 164.9            |
| N(4)–H(4B)···O(1)#4                                                                   | 0.81                       | 2.24                         | 2.960(2)                   | 148.0            |
| C(4)–H(4)···O(3)                                                                      | 0.95                       | 2.57                         | 3.283(3)                   | 132.4            |

Symmetry transformations used to generate equivalent atoms:

#1 +X,1-Y,-1/2+Z; #2 +X,1+Y,+Z; #3 1-X,+Y,1/2-Z; #4 +X,1-Y,1/2+Z

| <b>II-3 [(C<sub>4</sub>H<sub>6</sub>N<sub>3</sub>)(CH<sub>3</sub>SO<sub>3</sub>)]</b> |  |  |  |  |
|---------------------------------------------------------------------------------------|--|--|--|--|
|---------------------------------------------------------------------------------------|--|--|--|--|

| D–H…A             | $d_{D-H}$ (Å) | $d_{H…A}$ (Å) | $d_{D-A}$ (Å) | D–H–A (°) |
|-------------------|---------------|---------------|---------------|-----------|
| N(1)–H(1A)…O(2)#1 | 0.86          | 2.07          | 2.925(4)      | 174.2     |
| N(1)–H(1B)…O(1)#2 | 0.86          | 2.08          | 2.916(4)      | 165.0     |
| N(1)–H(1B)…O(3)#2 | 0.86          | 2.62          | 3.019(4)      | 109.5     |
| N(2)–H(2)…O(3)#1  | 0.86          | 1.84          | 2.686(3)      | 168.2     |
| C(5)–H(5C)…O(1)#3 | 0.96          | 2.48          | 3.175(3)      | 129.1     |

Symmetry transformations used to generate equivalent atoms:

#1 1+X,+Y,+Z; #2 -X,1/2+Y,3/2-Z; #3 -1+X,+Y,+Z

| III [(C <sub>4</sub> H <sub>5</sub> N <sub>3</sub> ) <sub>2</sub> (C <sub>4</sub> H <sub>6</sub> O <sub>4</sub> )] |               |               |               |           |
|--------------------------------------------------------------------------------------------------------------------|---------------|---------------|---------------|-----------|
| D–H…A                                                                                                              | $d_{D-H}$ (Å) | $d_{H…A}$ (Å) | $d_{D-A}$ (Å) | D–H–A (°) |
| N(1)–H(1A)…N(2)#1                                                                                                  | 0.88          | 2.15          | 3.027(2)      | 171.2     |
| N(1)–H(1B)…O(2) #2                                                                                                 | 0.88          | 2.16          | 3.0114(18)    | 162.1     |
| C(2)–H(2)…O(1)#3                                                                                                   | 0.95          | 2.36          | 3.260(2)      | 158.5     |
| O(1)–H(1)…N(3)#4                                                                                                   | 0.84          | 1.81          | 2.6359(18)    | 168.8     |

Symmetry transformations used to generate equivalent atoms:

#1 1-X,-Y,1-Z; #2 1+X,+Y,+Z; #3 -1+X,+Y,-1+Z; #4 +X,1/2-Y,1/2+Z

| IV [(C <sub>4</sub> H <sub>5</sub> N <sub>3</sub> )(H <sub>3</sub> BO <sub>3</sub> ) <sub>2</sub> ] |               |               |               |           |
|-----------------------------------------------------------------------------------------------------|---------------|---------------|---------------|-----------|
| D–H…A                                                                                               | $d_{D-H}$ (Å) | $d_{H…A}$ (Å) | $d_{D-A}$ (Å) | D–H–A (°) |
| N(1)–H(1A)…N(1)#1                                                                                   | 0.87          | 2.44          | 2.867(2)      | 110.6     |
| N(1)–H(1A)…N(1)#2                                                                                   | 0.87          | 2.21          | 2.867(2)      | 131.9     |
| N(1)–H(1B)…O(1)#2                                                                                   | 0.87          | 2.18          | 2.989(2)      | 154.3     |
| N(1)–H(1C)…N(2)                                                                                     | 0.50          | 1.92          | 2.237         | 124.0     |
| O(1)–H(1)…O(2)#3                                                                                    | 0.83          | 1.95          | 2.770(2)      | 167.2     |
| O(2)–H(2A)…O(3)#4                                                                                   | 0.83          | 1.88          | 2.708(2)      | 175.5     |
| O(3)–H(3)…N(2)                                                                                      | 0.83          | 1.98          | 2.746(2)      | 153.8     |

Symmetry transformations used to generate equivalent atoms:

#1 1-X,-1/2+Y,1/2-Z; #2 1-X,1/2+Y,1/2-Z; #3 2-X,-1/2+Y,1/2-Z; #4 2-X,2-Y,1-Z



**Table S6.** NLO properties comparison among inorganic and metal-free organic fundamental building units.

| Groups                                         | Structures                                                                          | Polarizability Anisotropy ( $\delta$ ) | Hyperpolarizability ( $ \beta_{\max} $ ) | HOMO-LOMO $E_g$ (eV) |
|------------------------------------------------|-------------------------------------------------------------------------------------|----------------------------------------|------------------------------------------|----------------------|
| $[\text{BO}_3]^{2-}$                           |    | 9.18                                   | 15.71                                    | 8.39                 |
| $[\text{CO}_3]^{2-}$                           |    | 12.49                                  | 23.87                                    | 8.02                 |
| $[\text{NO}_3]^{2-}$                           |    | 17.35                                  | 22.61                                    | 6.06                 |
| $[\text{C}(\text{NH}_2)_3]^+$                  |   | 19.91                                  | 72.13                                    | 8.74                 |
| $[\text{B}_3\text{O}_6]^{3-}$                  |  | 28.9                                   | 62.5                                     | 8.3                  |
| $[\text{C}_3\text{O}_3\text{N}_3]^{3-}$        |  | 51.2                                   | 175.2                                    | 6.4                  |
| $[\text{HC}_3\text{O}_3\text{N}_3]^{2-}$       |  | 53.6                                   | 250.3                                    | 6.6                  |
| $[\text{H}_2\text{C}_3\text{O}_3\text{N}_3]^-$ |  | 52.6                                   | 195.9                                    | 6.7                  |
| $[\text{H}_3\text{C}_3\text{O}_3\text{N}_3]$   |  | 54.4                                   | 112.9                                    | 5.9                  |
| $[\text{H}_2\text{C}_3\text{N}_3\text{S}_3]^-$ |  | 119                                    | 768                                      | 6.16                 |
| $[\text{HC}_3\text{N}_3\text{S}_3]^{2-}$       |  | 120                                    | 1112                                     | 6.12                 |

|                                                   |                                                                                     |        |        |      |
|---------------------------------------------------|-------------------------------------------------------------------------------------|--------|--------|------|
| $[\text{C}_6\text{N}_7\text{O}_3]^{3-}$           |    | 111.82 | 413.05 | 5.25 |
| $[\text{C}_6\text{N}_7(\text{NH}_2)_3]$           |    | 131.60 | 529.95 | 4.87 |
| $[\text{H}_2\text{C}_4\text{N}_2\text{O}_3]^{2-}$ |    | 55.6   | 190.5  | 6.0  |
| $[\text{H}_3\text{C}_4\text{N}_2\text{O}_3]^-$    |    | 54.4   | 112.9  | 5.9  |
| $[\text{C}_3\text{H}_7\text{N}_6]^+$              |    | 64.4   | 287.0  | 6.5  |
| $[\text{C}_3\text{H}_8\text{N}_6]^{2+}$           |    | 57.2   | 196.36 | 6.04 |
| $[\text{C}_3\text{H}_6\text{N}_6]^{2+}$           |  | 65.72  | 178.21 | 6.67 |
| $[\text{C}_5\text{H}_6\text{ON}]^+$               |  | 51.4   | 230.1  | 6.4  |
| $[\text{C}_4\text{H}_7\text{N}_3]^{2+}$           |  | 43     | 97.92  | 5.14 |
| $[\text{C}_4\text{H}_6\text{N}_3]^+$              |  | 46.88  | 165.6  | 5.25 |
| $[\text{C}_4\text{H}_5\text{N}_3]$                |  | 47.1   | 262.92 | 5.51 |
| $[\text{C}_4\text{H}_6\text{N}_3]^+$              |  | 43.71  | 160.96 | 4.92 |
| $[\text{C}_4\text{H}_5\text{N}_3]$                |  | 48.48  | 208.6  | 5.15 |

**Table S7.** Comparisons of title compounds with known semi-organic crystals.

| Sr. No | Compound                                                                                                                                             | Space group                                                        | $\lambda_{\text{cutoff}}/\text{nm}$ | Birefringence   | Ref       |
|--------|------------------------------------------------------------------------------------------------------------------------------------------------------|--------------------------------------------------------------------|-------------------------------------|-----------------|-----------|
| 1.     | [C(NH <sub>2</sub> ) <sub>3</sub> ] <sub>2</sub> (HPO <sub>4</sub> )(H <sub>2</sub> O)]                                                              | <i>P</i> 4 <sub>2</sub> <i>c</i>                                   | 220                                 | 0.014@532 nm    | [12]      |
| 2.     | [(C(NH <sub>2</sub> ) <sub>3</sub> ) <sub>2</sub> Zn(HPO <sub>3</sub> ) <sub>2</sub> ]                                                               | <i>Fdd2</i>                                                        | 194                                 | 0.030@1064 nm   | [13]      |
| 3.     | [C(NH <sub>2</sub> ) <sub>3</sub> ] <sub>2</sub> (PO <sub>3</sub> F)]                                                                                | <i>Cm</i>                                                          | 194                                 | 0.039@532 nm    | [14]      |
| 4.     | [C(NH <sub>2</sub> ) <sub>3</sub> ] <sub>3</sub> (PO <sub>4</sub> )(2H <sub>2</sub> O)]                                                              | <i>Pna2</i> <sub>1</sub>                                           | 250                                 | 0.055@546 nm    | [15]      |
| 5.     | [C(NH <sub>2</sub> ) <sub>3</sub> ] <sub>2</sub> (SO <sub>3</sub> S)]                                                                                | <i>P6</i> <sub>3</sub> <i>mc</i>                                   | 254                                 | 0.073@546 nm    | [16]      |
| 6.     | [C(NH <sub>2</sub> ) <sub>3</sub> (ClO <sub>4</sub> )]                                                                                               | <i>R3m</i>                                                         | 200                                 | 0.076@1064 nm   | [17]      |
| 7.     | [C(NH <sub>2</sub> ) <sub>3</sub> ] <sub>6</sub> (PO <sub>4</sub> ) <sub>2</sub> (3H <sub>2</sub> O)]                                                | <i>Cc</i>                                                          | 205                                 | 0.078 @546nm    | [18]      |
| 8.     | [C(NH <sub>2</sub> ) <sub>3</sub> (SbF <sub>4</sub> )]                                                                                               | <i>P2</i> <sub>1</sub> <i>2</i> <sub>1</sub> <i>2</i> <sub>1</sub> | 241                                 | 0.08@532 nm     | [19]      |
| 9.     | [(C <sub>3</sub> N <sub>6</sub> H <sub>7</sub> ) <sub>3</sub> (HgCl <sub>5</sub> )]                                                                  | <i>P</i> $\bar{1}$                                                 | 290                                 | 0.093@1064 nm   | [20]      |
| 10.    | [C(NH <sub>2</sub> ) <sub>3</sub> (H <sub>2</sub> PO <sub>2</sub> )]                                                                                 | <i>Pnma</i>                                                        | 201                                 | 0.10 @532 nm    | [21]      |
| 11.    | [(CN <sub>4</sub> H <sub>7</sub> )(CH <sub>3</sub> SO <sub>3</sub> )]                                                                                | <i>P2</i> <sub>1</sub> / <i>n</i>                                  | 198                                 | 0.102 @1064 nm  | [22]      |
| 12.    | [C(NH <sub>2</sub> ) <sub>3</sub> (BF <sub>4</sub> )]                                                                                                | <i>R3m</i>                                                         | 193                                 | 0.11@1064 nm    | [23]      |
| 13.    | [C(NH <sub>2</sub> ) <sub>3</sub> (SO <sub>3</sub> F)]                                                                                               | <i>R3m</i>                                                         | 200                                 | 0.133@1064 nm   | [24]      |
| 14.    | [C(NH <sub>2</sub> ) <sub>3</sub> (CH <sub>3</sub> SO <sub>3</sub> )]                                                                                | <i>C2</i> / <i>m</i>                                               | 195                                 | 0.137 @ 1064 nm | [22]      |
| 15.    | [C(NH <sub>2</sub> ) <sub>3</sub> (CF <sub>3</sub> SO <sub>3</sub> )]                                                                                | <i>C2</i> / <i>c</i>                                               | 182                                 | 0.139@1064 nm   | [22]      |
| 16.    | [(CN <sub>4</sub> H <sub>7</sub> )(CF <sub>3</sub> SO <sub>3</sub> )]                                                                                | <i>P</i> $\bar{1}$                                                 | 183                                 | 0.141@1064 nm   | [22]      |
| 17.    | [C(NH <sub>2</sub> ) <sub>3</sub> (NO <sub>3</sub> )]                                                                                                | <i>Cm</i>                                                          | 269                                 | 0.143@1064 nm   | [25]      |
| 18.    | [(C <sub>4</sub> H <sub>6</sub> N <sub>3</sub> )(H <sub>2</sub> PO <sub>4</sub> )] <b>I-1</b>                                                        | <i>P2</i> <sub>1</sub> <i>2</i> <sub>1</sub> <i>2</i> <sub>1</sub> | 366                                 | 0.145 @546 nm   | This work |
| 19.    | [Lu <sub>5</sub> (C <sub>3</sub> N <sub>3</sub> O <sub>3</sub> )(OH) <sub>12</sub> ]                                                                 | <i>P</i> $\bar{6}$ <i>2m</i>                                       | 235                                 | 0.148@800 nm    | [26]      |
| 20.    | [Y <sub>5</sub> (C <sub>3</sub> N <sub>3</sub> O <sub>3</sub> )(OH) <sub>12</sub> ]                                                                  | <i>P</i> $\bar{6}$ <i>2m</i>                                       | 225                                 | 0.149@800 nm    | [26]      |
| 21.    | [(C <sub>3</sub> N <sub>6</sub> H <sub>7</sub> ) <sub>2</sub> (SiF <sub>6</sub> )(H <sub>2</sub> O)]                                                 | <i>P2</i> <sub>1</sub> / <i>n</i>                                  | 220                                 | 0.152@550 nm    | [27]      |
| 22.    | [RbLi(HC <sub>3</sub> N <sub>3</sub> O <sub>3</sub> )(2H <sub>2</sub> O)]                                                                            | <i>Pna2</i> <sub>1</sub>                                           | 239                                 | 0.18@514 nm     | [28]      |
| 23.    | [KLi(HC <sub>3</sub> N <sub>3</sub> O <sub>3</sub> )(2H <sub>2</sub> O)]                                                                             | <i>Pna2</i> <sub>1</sub>                                           | 237                                 | 0.186@514 nm    | [29]      |
| 24.    | [K <sub>3</sub> Pb(H <sub>2</sub> C <sub>3</sub> N <sub>3</sub> O <sub>3</sub> ) <sub>5</sub> (H <sub>2</sub> O) <sub>6</sub> ]                      | <i>C2</i> / <i>m</i>                                               | 255                                 | 0.193 @532nm    | [30]      |
| 25.    | [RbNa(HC <sub>3</sub> N <sub>3</sub> O <sub>3</sub> )(2H <sub>2</sub> O)]                                                                            | <i>Pna2</i> <sub>1</sub>                                           | 266                                 | 0.194@589 nm    | [31]      |
| 26.    | [(C <sub>3</sub> H <sub>7</sub> N <sub>6</sub> ) <sub>6</sub> (H <sub>2</sub> PO <sub>4</sub> ) <sub>4</sub> (HPO <sub>4</sub> )(4H <sub>2</sub> O)] | <i>P2</i> <sub>1</sub>                                             | N/A                                 | 0.220@1064 nm   | [32]      |
| 27.    | [NaRb <sub>0.86</sub> Cs <sub>0.14</sub> (HC <sub>3</sub> N <sub>3</sub> O <sub>3</sub> )(2H <sub>2</sub> O)]                                        | <i>Pna2</i> <sub>1</sub>                                           | N/A                                 | 0.238@532 nm    | [33]      |
| 28.    | [Sr <sub>0.5</sub> (H <sub>2</sub> C <sub>6</sub> N <sub>7</sub> O <sub>3</sub> )(4H <sub>2</sub> O)]                                                | <i>Fdd2</i>                                                        | 304                                 | 0.239@1064 nm   | [34]      |
| 29.    | (C <sub>3</sub> N <sub>6</sub> H <sub>7</sub> )(C <sub>3</sub> N <sub>6</sub> H <sub>6</sub> )HgCl <sub>3</sub>                                      | <i>P2</i> <sub>1</sub>                                             | 278                                 | 0.246@1064 nm   | [20]      |
| 30.    | [(C <sub>4</sub> H <sub>5</sub> N <sub>3</sub> )(H <sub>3</sub> BO <sub>3</sub> ) <sub>2</sub> ] <b>IV</b>                                           | <i>P2</i> <sub>1</sub> / <i>c</i>                                  | 340                                 | 0.248 @546 nm*  | This work |
| 31.    | [(C <sub>3</sub> N <sub>6</sub> H <sub>7</sub> )(C <sub>3</sub> N <sub>6</sub> H <sub>6</sub> )(ZnCl <sub>3</sub> )]                                 | <i>P2</i> <sub>1</sub>                                             | 236                                 | 0.255@1064 nm   | [35]      |
| 32.    | 2(C <sub>3</sub> H <sub>7</sub> N <sub>6</sub> )(2Cl)(H <sub>2</sub> O)]                                                                             | <i>Cmc2</i> <sub>1</sub>                                           | 245                                 | 0.277@546 nm    | [36]      |
| 33.    | [LiCl(H <sub>3</sub> C <sub>3</sub> N <sub>3</sub> O <sub>3</sub> )]                                                                                 | <i>R3m</i>                                                         | 215                                 | 0.28@800 nm     | [37]      |
| 34.    | [NaCs <sub>3</sub> (H <sub>2</sub> C <sub>3</sub> N <sub>3</sub> O <sub>3</sub> ) <sub>4</sub> (3H <sub>2</sub> O)]                                  | <i>Pmn2</i> <sub>1</sub>                                           | 227                                 | 0.29@514 nm     | [38]      |
| 35.    | [(C <sub>3</sub> H <sub>8</sub> N <sub>6</sub> )(SnCl <sub>4</sub> )]                                                                                | <i>Pna2</i> <sub>1</sub>                                           | 334                                 | 0.294@550 nm    | [39]      |
| 36.    | [K <sub>2</sub> Sn <sub>2</sub> (C <sub>2</sub> O <sub>4</sub> ) <sub>2</sub> F <sub>2</sub> (H <sub>2</sub> O)]                                     | <i>P2</i> <sub>1</sub> / <i>c</i>                                  | 310                                 | 0.301@546 nm    | [40]      |
| 37.    | [RbLi(H <sub>2</sub> C <sub>3</sub> N <sub>3</sub> O <sub>3</sub> ) <sub>2</sub> (2H <sub>2</sub> O)]                                                | <i>P2</i> <sub>1</sub> / <i>m</i>                                  | N/A                                 | >0.30           | [41]      |
| 38.    | [CsLi(H <sub>2</sub> C <sub>3</sub> N <sub>3</sub> O <sub>3</sub> ) <sub>2</sub> (2H <sub>2</sub> O)]                                                | <i>P2</i> <sub>1</sub> / <i>m</i>                                  | N/A                                 | >0.30           | [41]      |
| 39.    | [Ba <sub>2</sub> Pb(C <sub>3</sub> N <sub>3</sub> O <sub>3</sub> ) <sub>2</sub> ]                                                                    | <i>R</i> $\bar{3}$                                                 | 264                                 | 0.31@800 nm     | [42]      |
| 40.    | [(C <sub>3</sub> N <sub>6</sub> H <sub>7</sub> )(CH <sub>3</sub> SO <sub>3</sub> )(H <sub>2</sub> O)]                                                | <i>P</i> $\bar{1}$                                                 | 233                                 | 0.31 @ 546 nm   | [43]      |
| 41.    | [(C <sub>3</sub> H <sub>8</sub> N <sub>6</sub> )(PbBr <sub>4</sub> )]                                                                                | <i>P2</i> <sub>1</sub> / <i>c</i>                                  | 374                                 | 0.322@550 nm    | [44]      |
| 42.    | [K <sub>2</sub> Pb(H <sub>2</sub> C <sub>3</sub> N <sub>3</sub> O <sub>3</sub> ) <sub>4</sub> (4H <sub>2</sub> O)]                                   | <i>Cm</i>                                                          | 277                                 | 0.325@532 nm    | [30]      |
| 43.    | [ $\beta$ -(C <sub>3</sub> H <sub>7</sub> N <sub>6</sub> ) <sub>2</sub> Cl <sub>2</sub> (H <sub>2</sub> O)]                                          | <i>C2</i> / <i>m</i>                                               | 230                                 | 0.33@550 nm     | [45]      |
| 44.    | [(C <sub>3</sub> N <sub>6</sub> H <sub>7</sub> )(NH <sub>2</sub> SO <sub>3</sub> )]                                                                  | <i>P</i> $\bar{1}$                                                 | 206                                 | 0.340@546 nm    | [46]      |
| 45.    | [C <sub>10</sub> H <sub>10</sub> ClNO <sub>3</sub> ]                                                                                                 | <i>P2</i> <sub>1</sub> / <i>c</i>                                  | N/A                                 | 0.345 @550 nm   | [47]      |
| 46.    | [Ba <sub>2</sub> Ca(C <sub>3</sub> N <sub>3</sub> O <sub>3</sub> ) <sub>2</sub> ]                                                                    | <i>R</i> $\bar{3}$                                                 | 230                                 | 0.345@800 nm    | [48]      |
| 47.    | [Li <sub>2</sub> (HC <sub>3</sub> N <sub>3</sub> O <sub>3</sub> )]                                                                                   | <i>P2</i> <sub>1</sub> / <i>c</i>                                  | N/A                                 | 0.345@532 nm    | [33]      |
| 48.    | [K <sub>2</sub> (HC <sub>3</sub> N <sub>3</sub> O <sub>3</sub> )]                                                                                    | <i>Cmcm</i>                                                        | 240                                 | 0.35@800 nm     | [49]      |
| 49.    | [K <sub>0.5</sub> In <sub>0.5</sub> (H <sub>2</sub> C <sub>6</sub> N <sub>7</sub> O <sub>3</sub> ) <sub>2</sub> (9H <sub>2</sub> O)]                 | <i>P</i> $\bar{1}$                                                 | 306                                 | 0.35@1064 nm    | [50]      |
| 50.    | [Ba <sub>2</sub> Mg(C <sub>3</sub> N <sub>3</sub> O <sub>3</sub> ) <sub>2</sub> ]                                                                    | <i>R</i> $\bar{3}$                                                 | 225                                 | 0.351@800 nm    | [48]      |
| 51.    | [Rb <sub>2</sub> Ca(H <sub>2</sub> C <sub>3</sub> N <sub>3</sub> O <sub>3</sub> ) <sub>4</sub> (4H <sub>2</sub> O)]                                  | <i>C2</i> / <i>m</i>                                               | 231                                 | 0.362@800 nm    | [51]      |
| 52.    | [NaRb <sub>3</sub> (H <sub>2</sub> C <sub>3</sub> N <sub>3</sub> O <sub>3</sub> ) <sub>4</sub> (3H <sub>2</sub> O)]                                  | <i>Pmn2</i> <sub>1</sub>                                           | 230                                 | 0.368@1064 nm   | [52]      |
| 53.    | [(C <sub>3</sub> N <sub>6</sub> H <sub>7</sub> )(BF <sub>4</sub> )(H <sub>2</sub> O)]                                                                | <i>P</i> $\bar{1}$                                                 | 244                                 | 0.37@546 nm     | [43]      |
| 54.    | [K <sub>2</sub> Ca(H <sub>2</sub> C <sub>3</sub> N <sub>3</sub> O <sub>3</sub> ) <sub>4</sub> (4H <sub>2</sub> O)]                                   | <i>C2</i> / <i>m</i>                                               | 233                                 | 0.371@800 nm    | [51]      |
| 55.    | [Ca <sub>3</sub> (C <sub>3</sub> N <sub>3</sub> O <sub>3</sub> ) <sub>2</sub> ]                                                                      | <i>R3c</i>                                                         | N/A                                 | 0.372@589 nm    | [53]      |

|     |                                                                                                                                                |                                                 |     |               |           |
|-----|------------------------------------------------------------------------------------------------------------------------------------------------|-------------------------------------------------|-----|---------------|-----------|
| 56. | [Sr <sub>3</sub> (C <sub>3</sub> N <sub>3</sub> O <sub>3</sub> ) <sub>2</sub> ]                                                                | <i>R3c</i>                                      | 420 | 0.374@589 nm  | [54]      |
| 57. | [K <sub>2</sub> Mg(H <sub>2</sub> C <sub>3</sub> N <sub>3</sub> O <sub>3</sub> ) <sub>4</sub> (4H <sub>2</sub> O)]                             | <i>C2/m</i>                                     | 230 | 0.376@800 nm  | [51]      |
| 58. | [(C <sub>3</sub> H <sub>7</sub> N <sub>6</sub> )F(H <sub>2</sub> O)]                                                                           | <i>C2/m</i>                                     | 220 | 0.38@550 nm   | [55]      |
| 59. | [(C <sub>3</sub> N <sub>6</sub> H <sub>7</sub> ) <sub>2</sub> SbF <sub>5</sub> (H <sub>2</sub> O)]                                             | <i>P1</i>                                       | 220 | 0.38@550 nm   | [56]      |
| 60. | [(C <sub>8</sub> S <sub>2</sub> Mg(H <sub>2</sub> C <sub>3</sub> N <sub>3</sub> O <sub>3</sub> ) <sub>4</sub> (10H <sub>2</sub> O)]            | <i>P1</i>                                       | 234 | 0.391@800 nm  | [51]      |
| 61. | [(Rb <sub>2</sub> (HC <sub>3</sub> N <sub>3</sub> O <sub>3</sub> )]                                                                            | <i>Cmcm</i>                                     | N/A | 0.4@532 nm    | [33]      |
| 62. | [K <sub>4</sub> (HC <sub>3</sub> N <sub>3</sub> S <sub>3</sub> ) <sub>2</sub> (H <sub>2</sub> O)]                                              | <i>P2<sub>1</sub>2<sub>1</sub>2<sub>1</sub></i> | 406 | 0.402@ 550 nm | [57]      |
| 63. | [C <sub>3</sub> N <sub>6</sub> H <sub>7</sub> ] <sub>2</sub> [B <sub>3</sub> O <sub>3</sub> F <sub>4</sub> (OH)]                               | <i>P1</i>                                       | 240 | 0.440@546 nm  | [58]      |
| 64. | [K <sub>3</sub> (C <sub>6</sub> N <sub>7</sub> O <sub>3</sub> )(2H <sub>2</sub> O)]                                                            | <i>Cc</i>                                       | N/A | 0.446@1064 nm | [59]      |
| 65. | [(C <sub>4</sub> H <sub>6</sub> N <sub>3</sub> )(NH <sub>2</sub> SO <sub>3</sub> )] <b>II-2</b>                                                | <i>C2/c</i>                                     | 350 | 0.452@546nm   | This work |
| 66. | [(C <sub>4</sub> H <sub>6</sub> N <sub>3</sub> )(BF <sub>4</sub> )] <b>I-2</b>                                                                 | <i>P2<sub>1</sub>/n</i>                         | 370 | 0.489@546nm   | This work |
| 67. | [(C <sub>4</sub> H <sub>5</sub> N <sub>3</sub> )(C <sub>4</sub> H <sub>6</sub> N <sub>3</sub> )(CF <sub>3</sub> SO <sub>3</sub> )] <b>II-1</b> | <i>P1</i>                                       | 362 | 0.49@546 nm   | This work |
| 68. | [(C <sub>5</sub> H <sub>5</sub> NO)(Sb <sub>2</sub> OF <sub>4</sub> )]                                                                         | <i>Cm</i>                                       | 270 | 0.513@546 nm  | [60]      |
| 69. | [(C <sub>4</sub> H <sub>6</sub> N <sub>3</sub> )(CH <sub>3</sub> SO <sub>3</sub> )] <b>II-3</b>                                                | <i>P2<sub>1</sub>/c</i>                         | 360 | 0.594@546 nm  | This work |
| 70. | [Cd(H <sub>2</sub> C <sub>6</sub> N <sub>7</sub> O <sub>3</sub> ) <sub>2</sub> (8H <sub>2</sub> O)]                                            | <i>P2<sub>1</sub></i>                           | 310 | 0.60@550 nm   | [61]      |
| 71. | [C <sub>6</sub> N <sub>7</sub> (NH <sub>2</sub> ) <sub>3</sub> (H <sub>3</sub> PO <sub>4</sub> )]                                              | <i>R3c</i>                                      | 300 | 0.609@1064 nm | [62]      |
| 72. | [(C <sub>4</sub> H <sub>5</sub> N <sub>3</sub> ) <sub>2</sub> (C <sub>4</sub> H <sub>6</sub> O <sub>4</sub> )] <b>III</b>                      | <i>P2<sub>1</sub>/n</i>                         | 364 | 0.658@546 nm  | This work |

\*Represent the experimental birefringence

**Table S8.** Comparisons of title compounds with known semi-organic compounds in their corresponding families.

| <b>Phosphates</b>                     |                                                                                                                                                      |                                                      |                                     |                      |            |
|---------------------------------------|------------------------------------------------------------------------------------------------------------------------------------------------------|------------------------------------------------------|-------------------------------------|----------------------|------------|
| <b>Sr. No</b>                         | <b>Compound</b>                                                                                                                                      | <b>Space group</b>                                   | $\lambda_{\text{cutoff}}/\text{nm}$ | <b>Birefringence</b> | <b>Ref</b> |
| 1.                                    | [C(NH <sub>2</sub> ) <sub>3</sub> ] <sub>2</sub> (HPO <sub>4</sub> )(H <sub>2</sub> O)]                                                              | <i>P</i> $\bar{4}2_1c$                               | 220                                 | 0.010@532 nm         | [12]       |
| 2.                                    | [C(NH <sub>2</sub> ) <sub>3</sub> ] <sub>6</sub> (PO <sub>4</sub> ) <sub>2</sub> (3H <sub>2</sub> O)]                                                | <i>Cc</i>                                            | 205                                 | 0.077@546nm          | [18]       |
| 3.                                    | [C(NH <sub>2</sub> ) <sub>3</sub> (H <sub>2</sub> PO <sub>2</sub> )]                                                                                 | <i>Pnma</i>                                          | 201                                 | 0.085@532nm          | [21]       |
| 4.                                    | [(C <sub>4</sub> H <sub>6</sub> N <sub>3</sub> )(H <sub>3</sub> PO <sub>4</sub> )] <b>I-1</b>                                                        | <i>P</i> <sub>2</sub> <i>1</i> <sub>2</sub> <i>1</i> | 366                                 | 0.145@546 nm         | This work  |
| 5.                                    | [(C <sub>3</sub> H <sub>7</sub> N <sub>6</sub> ) <sub>6</sub> (H <sub>2</sub> PO <sub>4</sub> ) <sub>4</sub> (HPO <sub>4</sub> )(4H <sub>2</sub> O)] | <i>P</i> <sub>2</sub> <i>1</i>                       | N/A                                 | 0.220@1064 nm        | [32]       |
| 6.                                    | [(C <sub>3</sub> H <sub>6</sub> ON)(H <sub>2</sub> PO <sub>4</sub> )]                                                                                | <i>P</i> <sub>2</sub> <i>1</i> <sub>2</sub> <i>1</i> | 246                                 | 0.250@1064 nm        | [63]       |
| 7.                                    | [(C <sub>4</sub> H <sub>6</sub> N <sub>3</sub> )(H <sub>2</sub> PO <sub>3</sub> )]                                                                   | <i>P</i> <sub>2</sub> <i>1</i>                       | 346                                 | 0.275@1064 nm        | [64]       |
| 8.                                    | [(C <sub>4</sub> H <sub>6</sub> N <sub>3</sub> )(H <sub>2</sub> PO <sub>2</sub> ).(H <sub>2</sub> O)]                                                | <i>P</i> $\bar{1}$                                   | 328                                 | 0.349@1064 nm        | [65]       |
| <b>Fluoroborates/Fluorooxoborates</b> |                                                                                                                                                      |                                                      |                                     |                      |            |
| 9.                                    | [(NH <sub>4</sub> ) <sub>3</sub> (PO <sub>3</sub> F)(BF <sub>4</sub> )]                                                                              | <i>P</i> <sub>2</sub> <i>1</i> / <i>m</i>            | 190                                 | 0.012@1064 nm        | [66]       |
| 10.                                   | [C(NH <sub>2</sub> ) <sub>3</sub> (BF <sub>4</sub> )]                                                                                                | <i>R</i> 3 <i>m</i>                                  | 193                                 | 0.120@546nm          | [23]       |
| 11.                                   | [(C <sub>4</sub> H <sub>6</sub> N <sub>3</sub> )(BF <sub>4</sub> )]                                                                                  | <i>P</i> <sub>2</sub> <i>1</i> / <i>n</i>            | 333                                 | 0.127@1064 nm        | [65]       |
| 12.                                   | [C(NH <sub>2</sub> ) <sub>3</sub> ] <sub>2</sub> [B <sub>3</sub> O <sub>3</sub> F <sub>4</sub> (OH)]                                                 | <i>P</i> <i>1</i>                                    | 190                                 | 0.161@1064 nm        | [67]       |
| 13.                                   | [C(NH <sub>2</sub> ) <sub>3</sub> ][B <sub>3</sub> O <sub>3</sub> F <sub>2</sub> (OH) <sub>2</sub> ]                                                 | <i>P</i> <i>1</i>                                    | 195                                 | 0.173@1064 nm        | [67]       |
| 14.                                   | [(C <sub>3</sub> N <sub>2</sub> H <sub>5</sub> )B <sub>3</sub> O <sub>3</sub> F <sub>2</sub> (OH) <sub>2</sub> ]                                     | <i>P</i> $\bar{1}$                                   | 207                                 | 0.205@546 nm         | [68]       |
| 15.                                   | [(C <sub>3</sub> N <sub>6</sub> H <sub>7</sub> )(BF <sub>4</sub> ).(H <sub>2</sub> O)]                                                               | <i>P</i> $\bar{1}$                                   | 244                                 | 0.37@546 nm          | [43]       |
| 16.                                   | [C <sub>3</sub> N <sub>6</sub> H <sub>7</sub> ] <sub>2</sub> [B <sub>3</sub> O <sub>3</sub> F <sub>4</sub> (OH)]                                     | <i>P</i> $\bar{1}$                                   | 240                                 | 0.440@546 nm         | [69]       |
| 17.                                   | [(C <sub>4</sub> H <sub>6</sub> N <sub>3</sub> )(BF <sub>4</sub> )] <b>I-2</b>                                                                       | <i>P</i> <sub>2</sub> <i>1</i> / <i>n</i>            | 370                                 | 0.489 @546nm         | This work  |
| <b>Triflates</b>                      |                                                                                                                                                      |                                                      |                                     |                      |            |
| 18.                                   | [(C <sub>4</sub> H <sub>7</sub> N <sub>3</sub> )(CF <sub>3</sub> SO <sub>3</sub> ) <sub>2</sub> ]                                                    | <i>P</i> <sub>2</sub> <i>1</i> <sub>2</sub> <i>1</i> | 324                                 | 0.063@1064 nm        | [65]       |
| 19.                                   | [C(NH <sub>2</sub> ) <sub>3</sub> (CF <sub>3</sub> SO <sub>3</sub> )]                                                                                | <i>C</i> <sub>2</sub> / <i>c</i>                     | 182                                 | 0.139@1064 nm        | [22]       |
| 20.                                   | [(CN <sub>4</sub> H <sub>7</sub> )(CF <sub>3</sub> SO <sub>3</sub> )]                                                                                | <i>P</i> $\bar{1}$                                   | 183                                 | 0.141@1064 nm        | [22]       |
| 21.                                   | [(C <sub>4</sub> H <sub>5</sub> N <sub>3</sub> )(C <sub>4</sub> H <sub>6</sub> N <sub>3</sub> )(CF <sub>3</sub> SO <sub>3</sub> )] <b>II-1</b>       | <i>P</i> $\bar{1}$                                   | 362                                 | 0.490@546 nm         | This work  |
| <b>Sulfamates</b>                     |                                                                                                                                                      |                                                      |                                     |                      |            |
| 22.                                   | [(C <sub>4</sub> H <sub>6</sub> N <sub>3</sub> )(NH <sub>2</sub> SO <sub>3</sub> )]                                                                  | <i>C</i> <i>m</i>                                    | 350                                 | 0.220@546 nm         | [70]       |
| 23.                                   | [(C <sub>4</sub> H <sub>6</sub> N <sub>3</sub> )(NH <sub>2</sub> SO <sub>3</sub> )]                                                                  | <i>P</i> <sub>2</sub> <i>1</i> / <i>n</i>            | 333                                 | 0.241@1064 nm        | [65]       |
| 24.                                   | [(C <sub>3</sub> N <sub>6</sub> H <sub>7</sub> )(NH <sub>2</sub> SO <sub>3</sub> )]                                                                  | <i>P</i> $\bar{1}$                                   | 206                                 | 0.340 @546 nm        | [46]       |
| 25.                                   | [(C <sub>4</sub> H <sub>6</sub> N <sub>3</sub> )(NH <sub>2</sub> SO <sub>3</sub> )] <b>II-2</b>                                                      | <i>C</i> <sub>2</sub> / <i>c</i>                     | 350                                 | 0.452@546 nm         | This work  |
| <b>Methane sulfonates</b>             |                                                                                                                                                      |                                                      |                                     |                      |            |
| 26.                                   | [(CN <sub>4</sub> H <sub>7</sub> )(CH <sub>3</sub> SO <sub>3</sub> )]                                                                                | <i>P</i> <sub>2</sub> <i>1</i> / <i>n</i>            | 198                                 | 0.102@1064 nm        | [22]       |
| 27.                                   | [C(NH <sub>2</sub> ) <sub>3</sub> (CH <sub>3</sub> SO <sub>3</sub> )]                                                                                | <i>C</i> <sub>2</sub> / <i>m</i>                     | 195                                 | 0.137@1064 nm        | [22]       |
| 28.                                   | [(C <sub>3</sub> H <sub>6</sub> NO)(CH <sub>3</sub> SO <sub>3</sub> )]                                                                               | <i>P</i> <i>n</i> a <i>2</i> <sub>1</sub>            | 252                                 | 0.202@546 nm         | [71]       |
| 29.                                   | [(C <sub>3</sub> N <sub>6</sub> H <sub>7</sub> )(CH <sub>3</sub> SO <sub>3</sub> )(H <sub>2</sub> O)]                                                | <i>P</i> $\bar{1}$                                   | 233                                 | 0.310@546 nm         | [43]       |
| 30.                                   | [(C <sub>4</sub> H <sub>5</sub> N <sub>3</sub> )(C <sub>4</sub> H <sub>6</sub> N <sub>3</sub> )(CH <sub>3</sub> SO <sub>3</sub> )]                   | <i>P</i> <sub>2</sub> <i>1</i> / <i>c</i>            | 330                                 | 0.320@1064 nm        | [65]       |
| 31.                                   | [(C <sub>4</sub> H <sub>6</sub> N <sub>3</sub> )(CH <sub>3</sub> SO <sub>3</sub> )] <b>II-3</b>                                                      | <i>P</i> <sub>2</sub> <i>1</i> / <i>c</i>            | 360                                 | 0.594@ 546 nm        | This work  |
| <b>Succinate</b>                      |                                                                                                                                                      |                                                      |                                     |                      |            |
| 32.                                   | [(C <sub>4</sub> H <sub>5</sub> N <sub>3</sub> ) <sub>2</sub> (C <sub>4</sub> H <sub>6</sub> O <sub>4</sub> )] <b>III</b>                            | <i>P</i> <sub>2</sub> <i>1</i> / <i>c</i>            | 364                                 | 0.658@546 nm         | This work  |

**Table S9.** Assignments of the IR peaks for **I-1–I-2, II-1–II-3, III, and IV.**

| <b>Mode description</b>              | <b>I-1</b> | <b>I-2</b> | <b>II-1</b> | <b>II-2</b> | <b>II-3</b> | <b>III</b> | <b>IV</b> | <b>Ref</b> |
|--------------------------------------|------------|------------|-------------|-------------|-------------|------------|-----------|------------|
| $\nu(\text{NH}_2)$                   | 3329       | 3329       | 3334        | 3311        | 3316        | 3394       | 3391      |            |
| $\nu_s(\text{C}=\text{N})$           | 1687       | 1659       | 1657        | 1677        | 1668        | 1696       | -         | [72-74]    |
| $\nu_s(\text{C}=\text{C})$           | -          |            |             | 1640        |             | 1636       | 1610      |            |
| $\nu(\text{P}=\text{O})$             | 1111,1219  |            |             |             |             |            |           | [64,74]    |
| $\delta(\text{O}-\text{P}-\text{O})$ | 497, 561   |            |             |             |             |            |           |            |
| $\nu_s(\text{B}-\text{F})$           |            | 703        |             |             |             |            |           |            |
| $\nu_{as}(\text{B}-\text{F})$        |            | 1071       |             |             |             |            |           | [75]       |
| $\delta(\text{B}-\text{F})$          |            | 529        |             |             |             |            |           |            |
| $\nu_s(\text{S}=\text{O})$           |            |            | 1016        | 1005        | 1004        |            |           |            |
| $\nu_{as}(\text{S}=\text{O})$        |            |            | 634         | 636         | 1042        |            |           | [22]       |
| $\nu_s(\text{C}-\text{F})$           |            |            | 1263        |             | 630         |            |           |            |
| $\delta(\text{C}-\text{F})$          |            |            | 812         |             |             |            |           |            |
| $\delta_s(\text{CH}_3)$              |            |            |             |             | 1371        |            |           |            |
| $\delta_{as}(\text{CH}_3)$           |            |            |             |             | 1421        |            |           | [71]       |
| $\nu(\text{S}-\text{C})$             |            |            |             |             | 776         |            |           |            |
| $\nu(\text{C}=\text{O})$             |            |            |             |             |             | 1544       |           |            |
| $\nu_{as}(\text{COO})$               |            |            |             |             |             | 1704       |           | [73]       |
| $\nu_{as}(\text{BO}_3)$              |            |            |             |             |             |            | 1442,1522 |            |
| $\delta(\text{BO}_3)$                |            |            |             |             |             |            | 548       | [76]       |

$\nu$ = stretching,  $\nu_s$ = symmetrical Stretching,  $\nu_{as}$ = asymmetrical stretching,  $\delta$ = bending vibrations,  $\delta_s$ =symmetric bending vibrations,  $\delta_{as}$ =asymmetric bending vibrations.

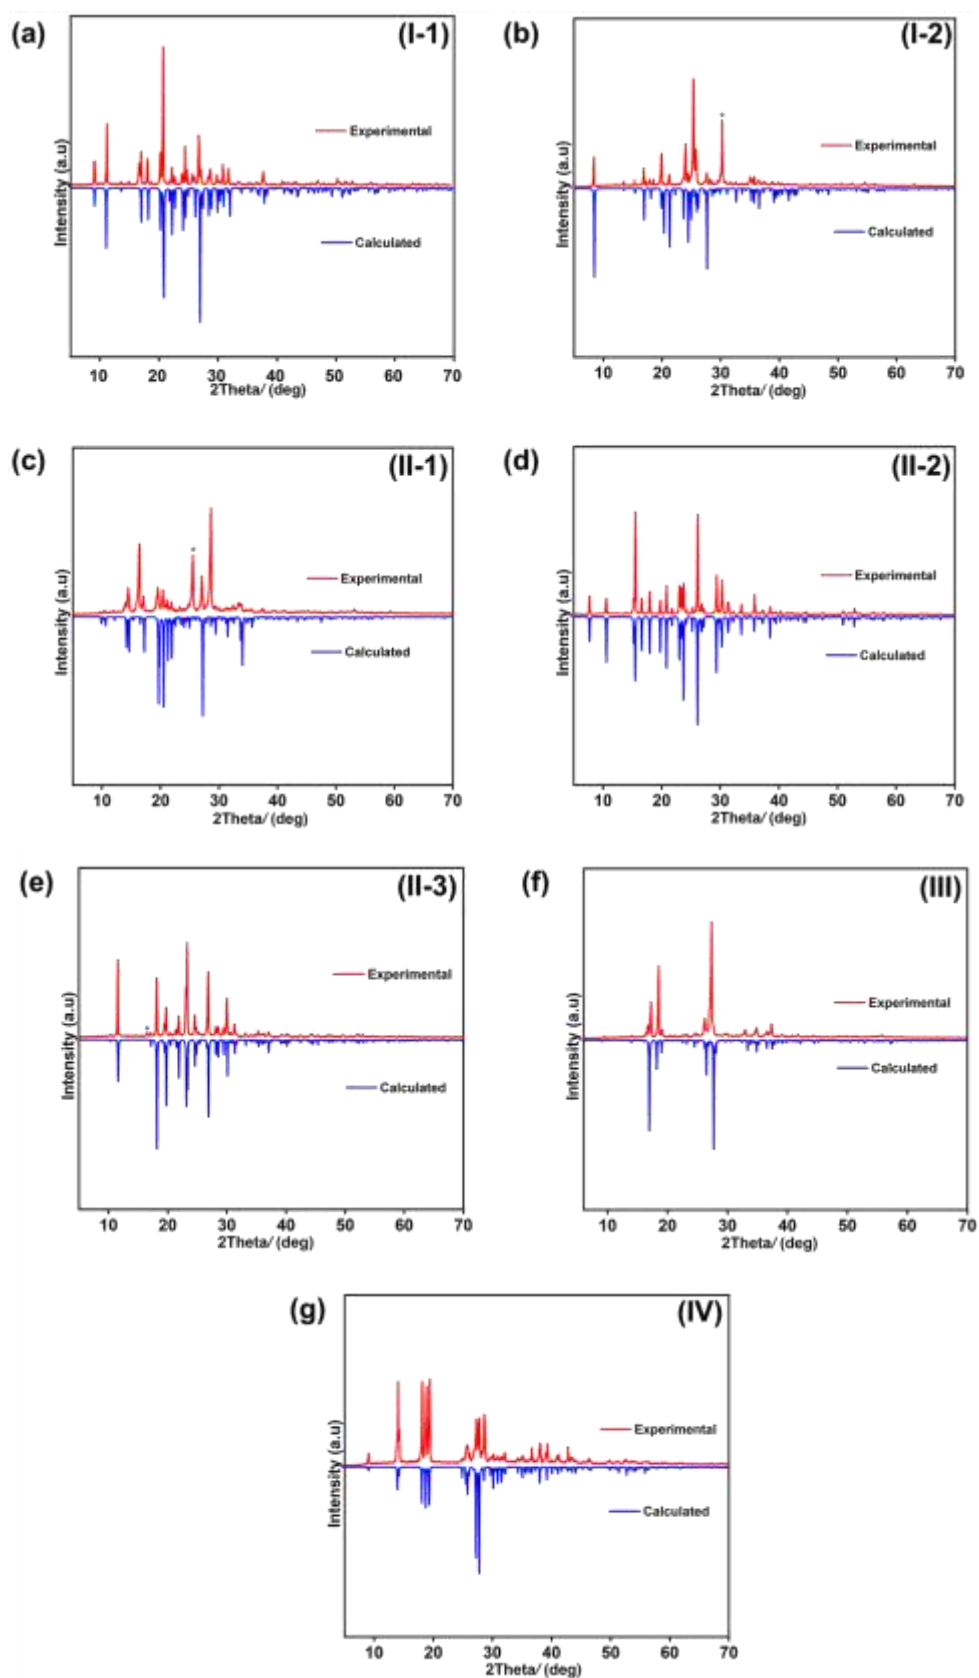

**Figure S1.** The powder XRD patterns of I-1–I-2, II-1–II-3, III, and IV.

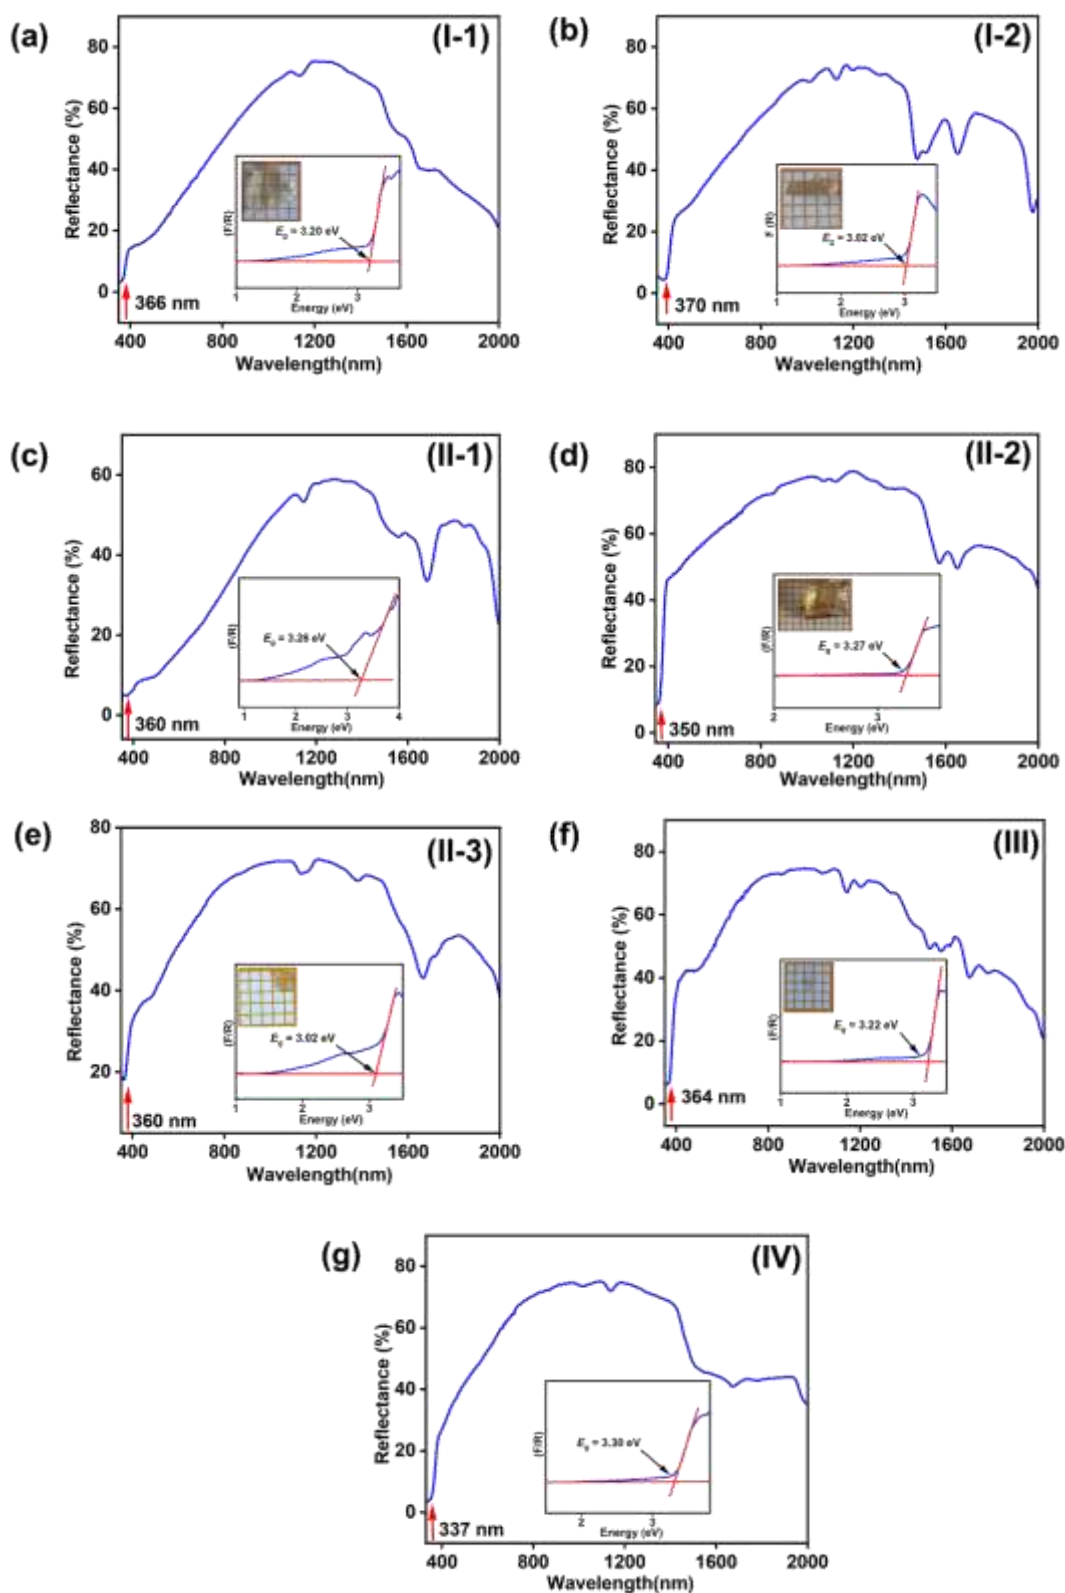

**Figure S2.** UV-vis-NIR diffuse reflectance spectra and their corresponding experimental band gaps of I-1–I-2, II-1–II-3, III, and IV.



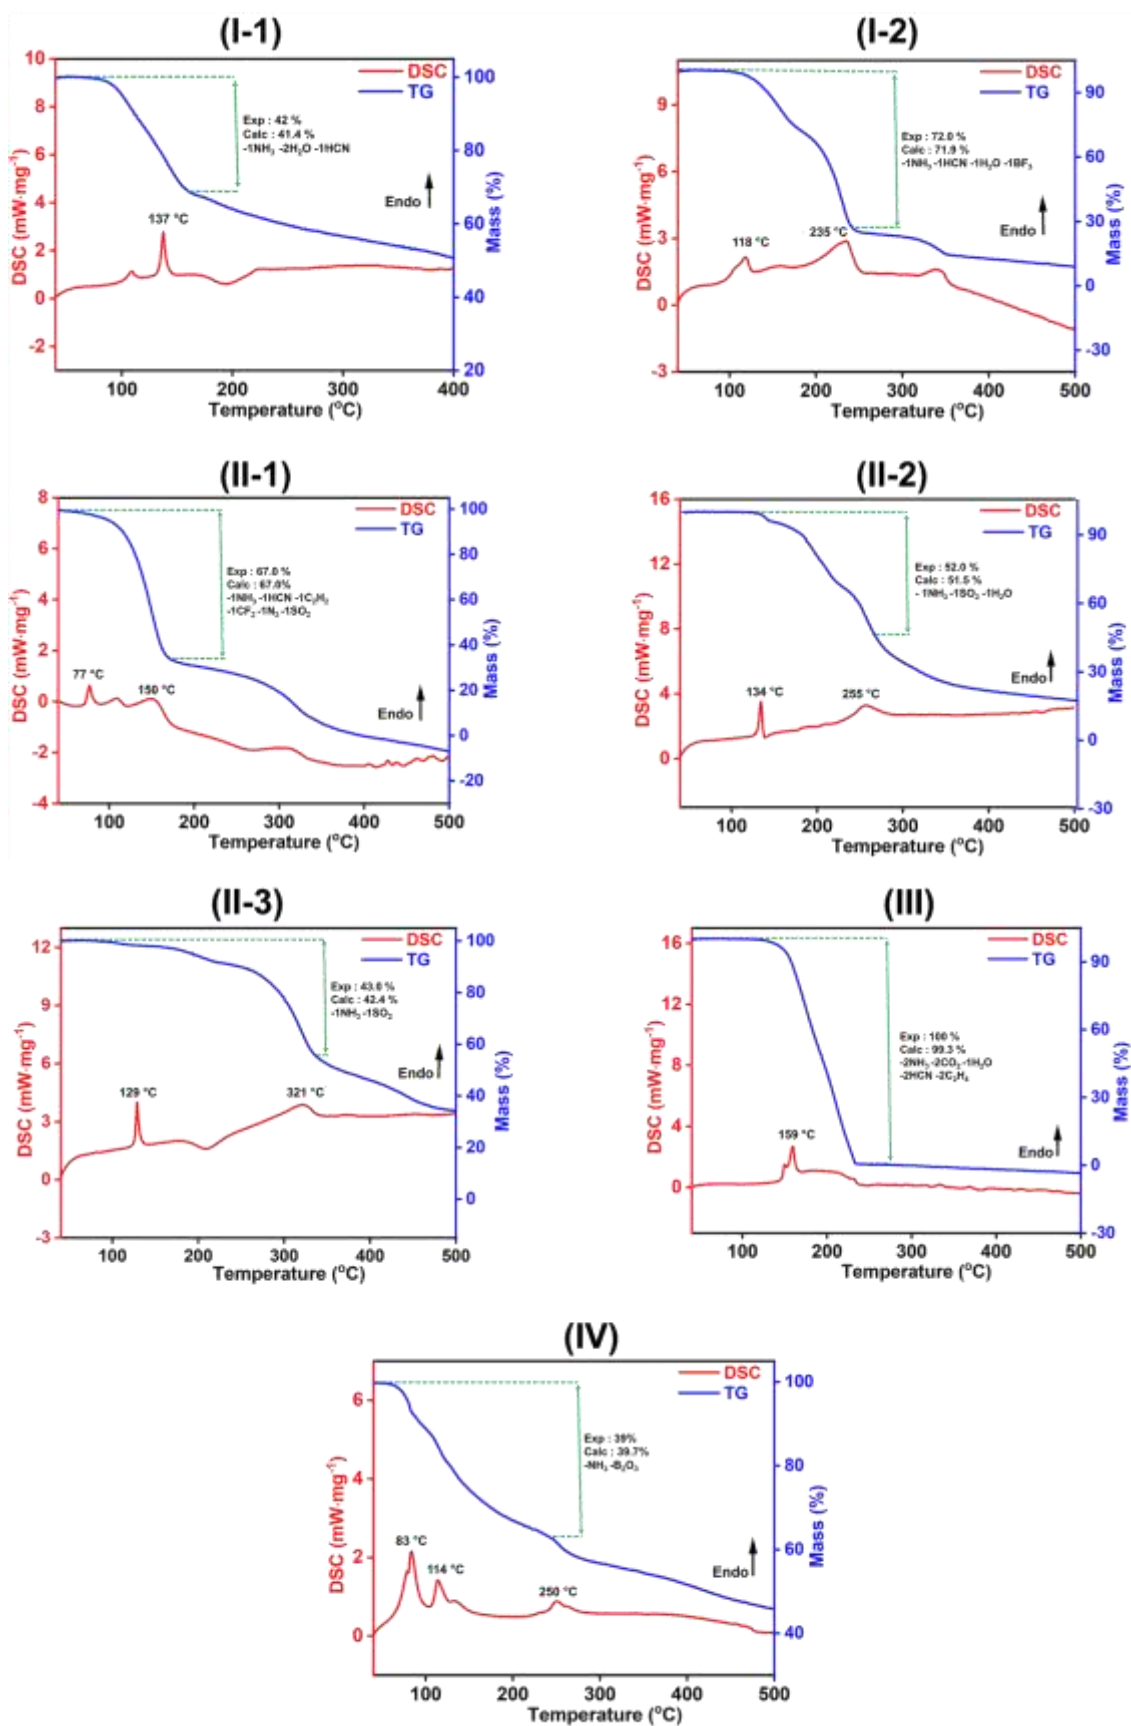

**Figure S3.** The differential scanning calorimetry (DSC) and thermogravimetry (TG) curves for I-1–I-2, II-1–II-3, III, and IV.

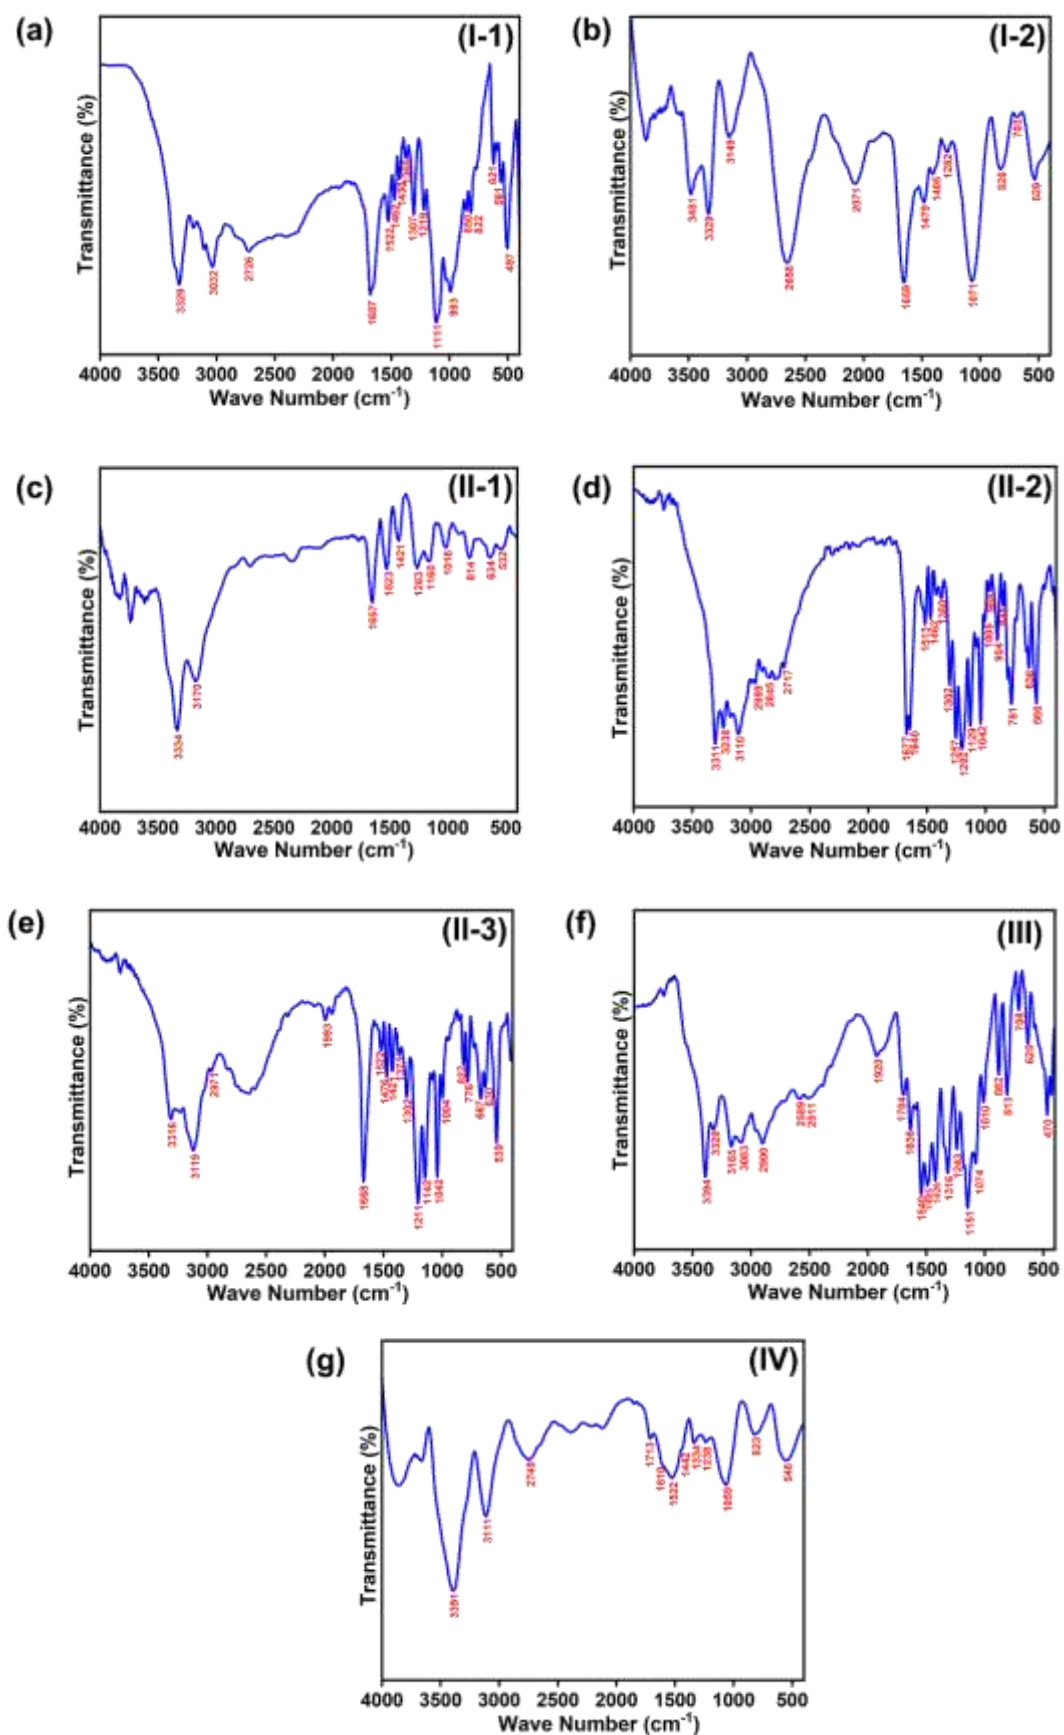

Figure S4. IR spectra for I-1–I-2, II-1–II-3, III, and IV.

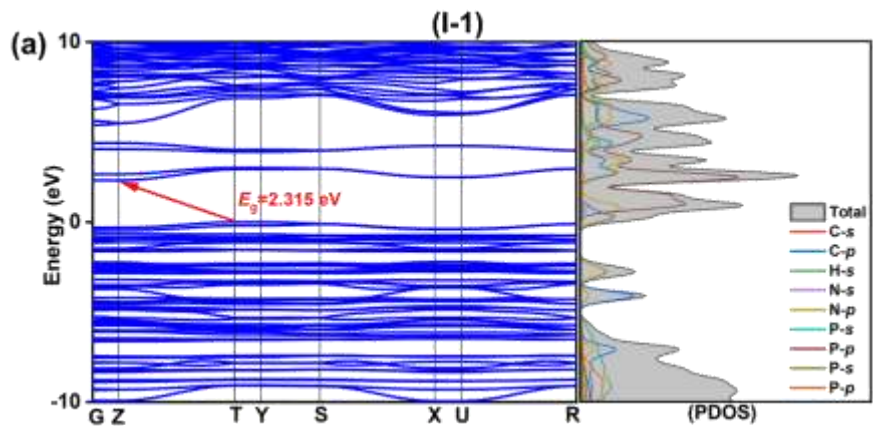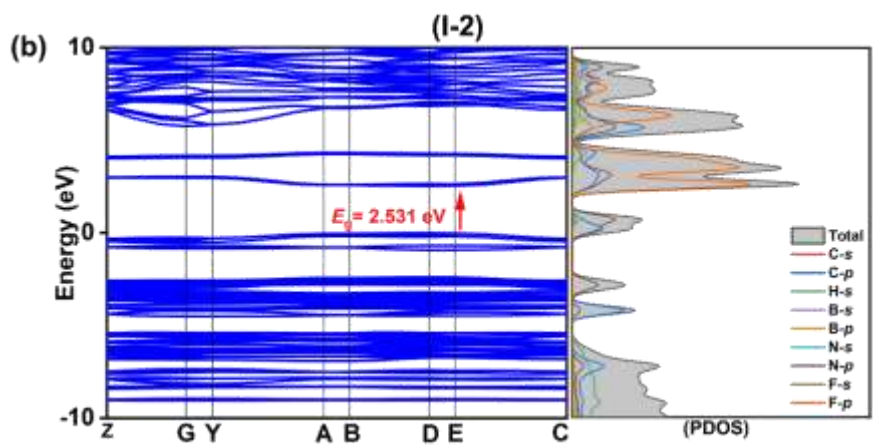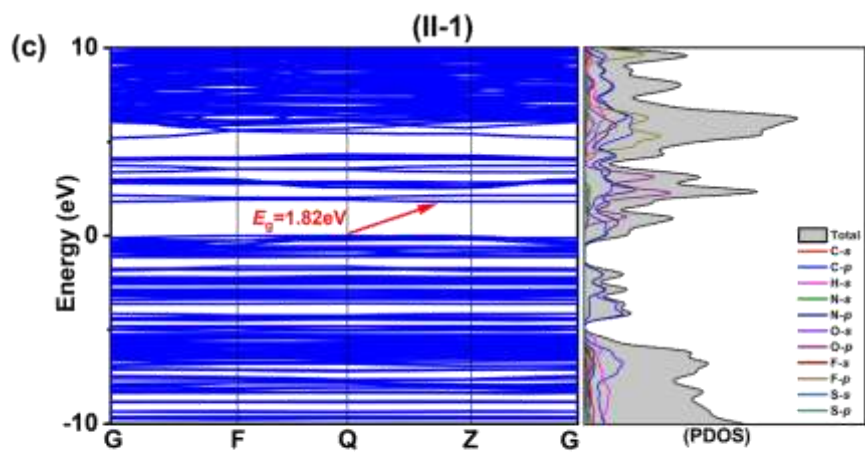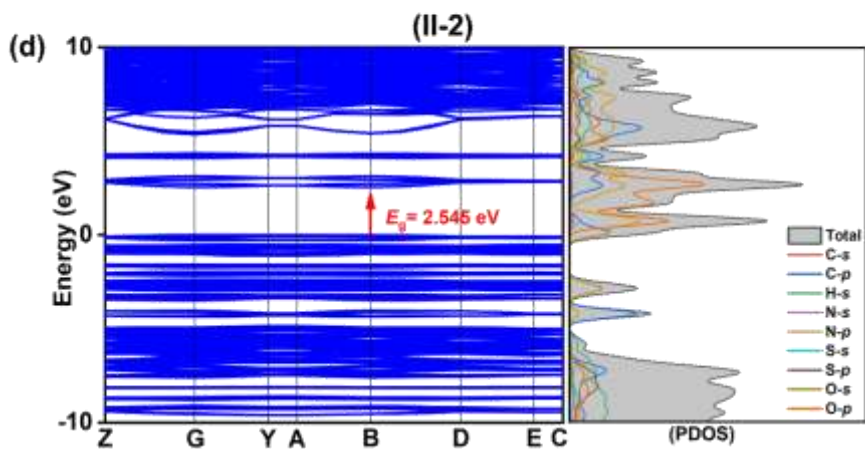

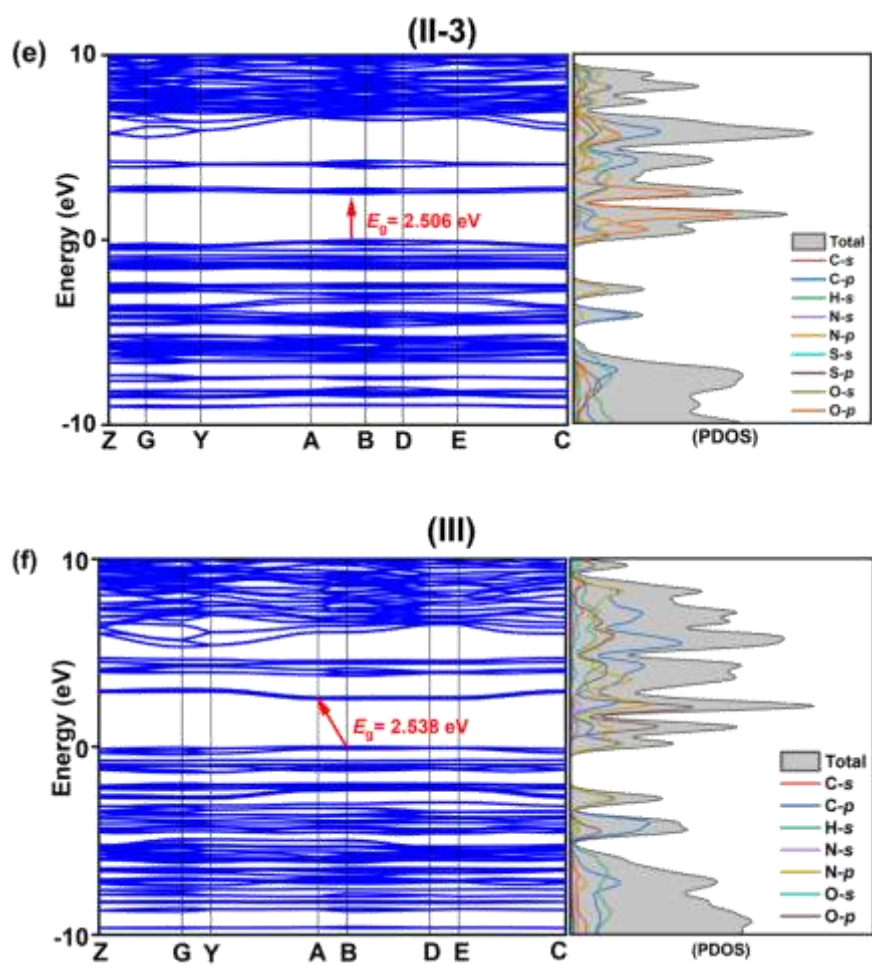

**Figure S5.** The calculated band gaps and partial densities of states for I-1–I-2, II-1–II-3, and III.

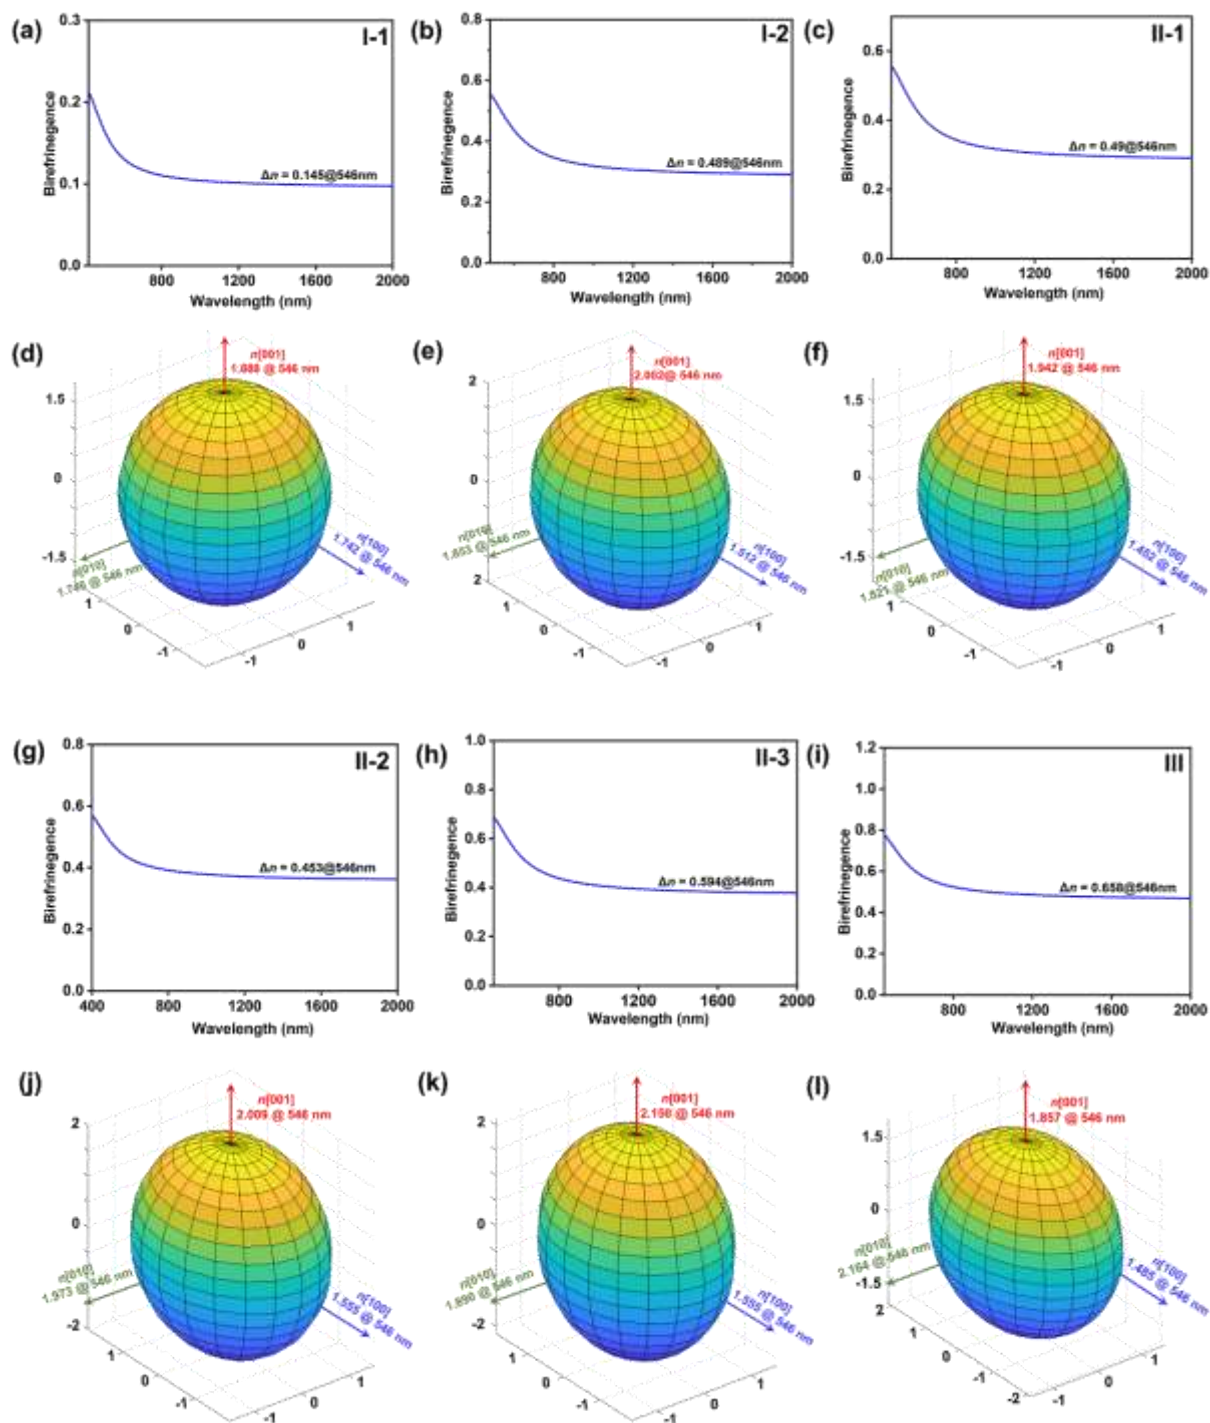

**Figure S6.** Calculated birefringence and triaxial ellipsoid of three refractive indices along crystallographic axes for I-1-I-2, II-1-II-3, and III.

I-1  $[(C_4H_6N_3)(H_2PO_4)]$

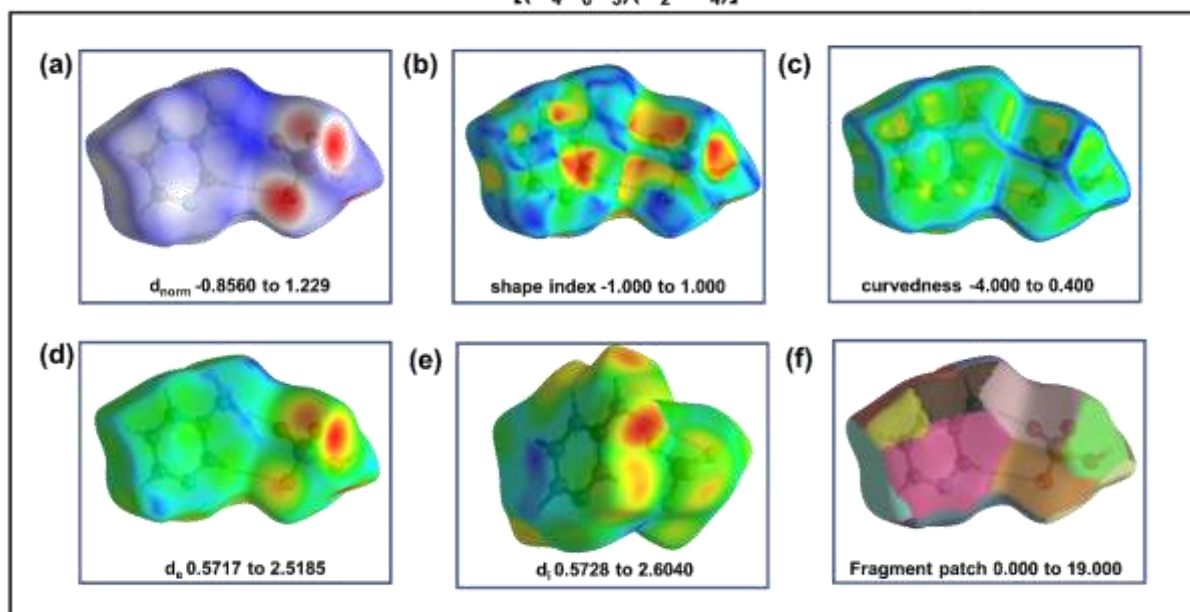

I-2  $[(C_4H_6N_3)(BF_4)]$

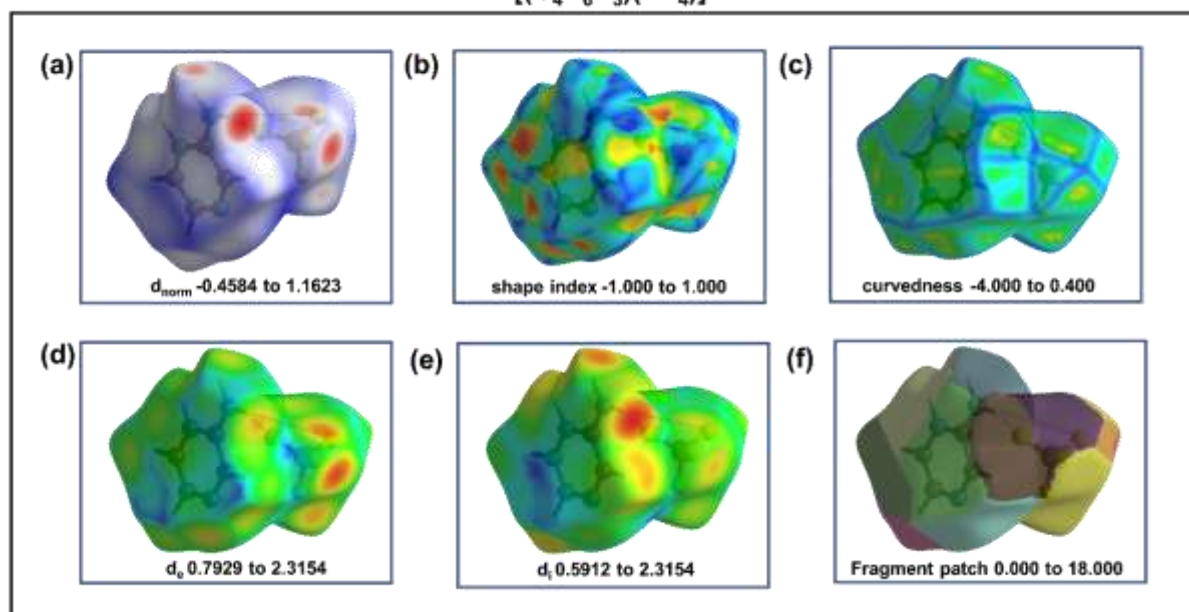

II-1  $[(C_4H_5N_3)(C_4H_6N_3)(CF_3SO_3)]$

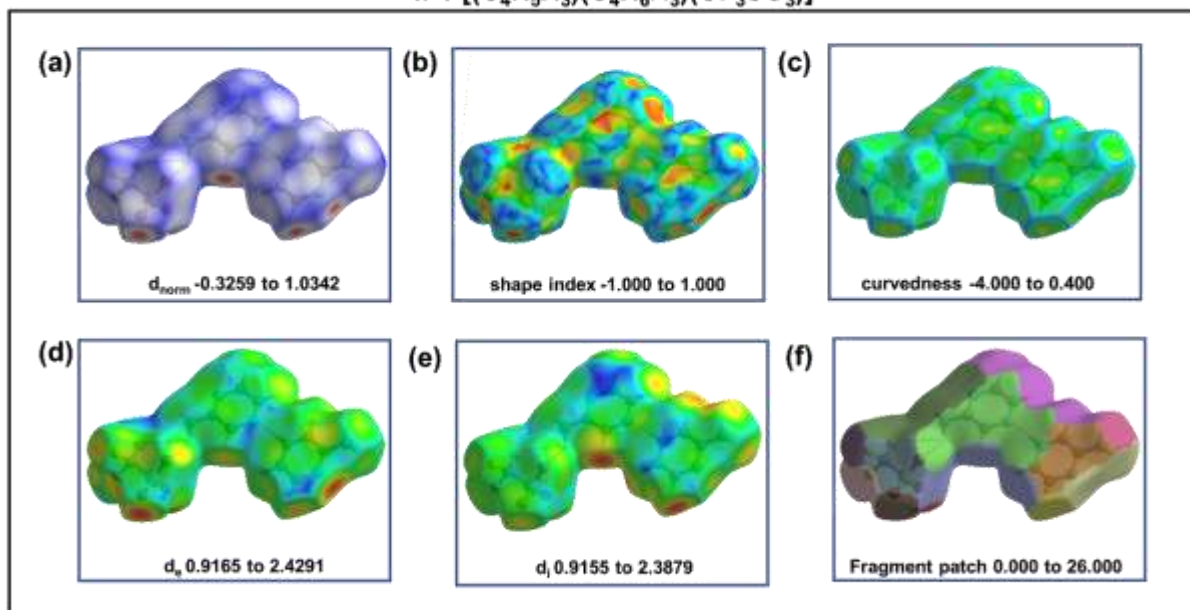

II-2  $[(C_4H_6N_3)(NH_2SO_3)]$

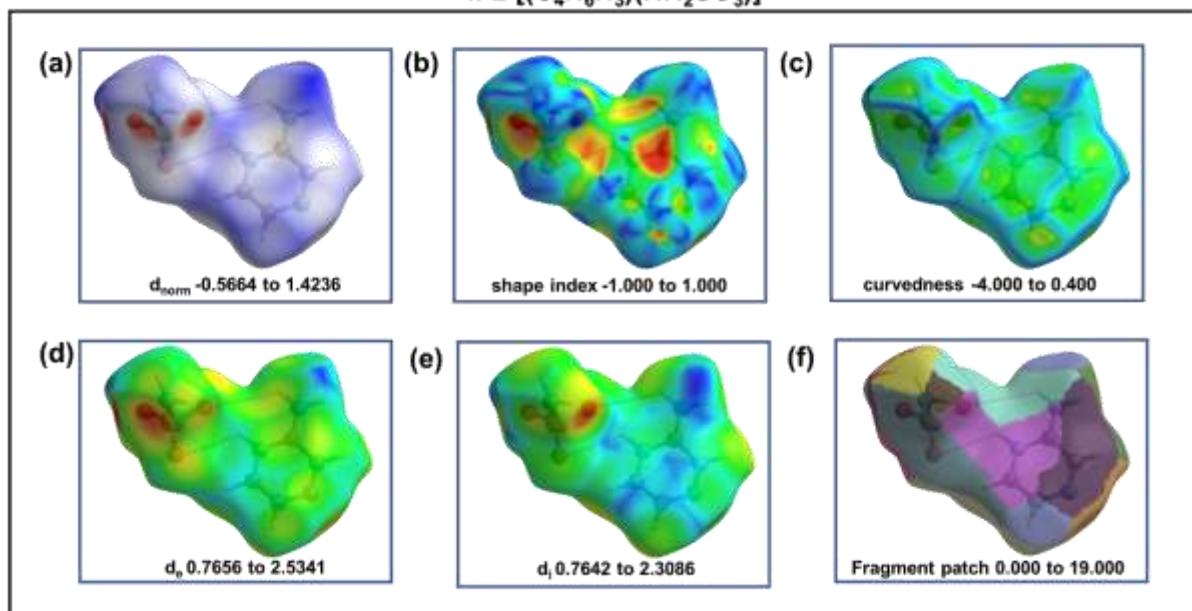

II-3  $[(C_4H_6N_3)(CH_3SO_3)]$

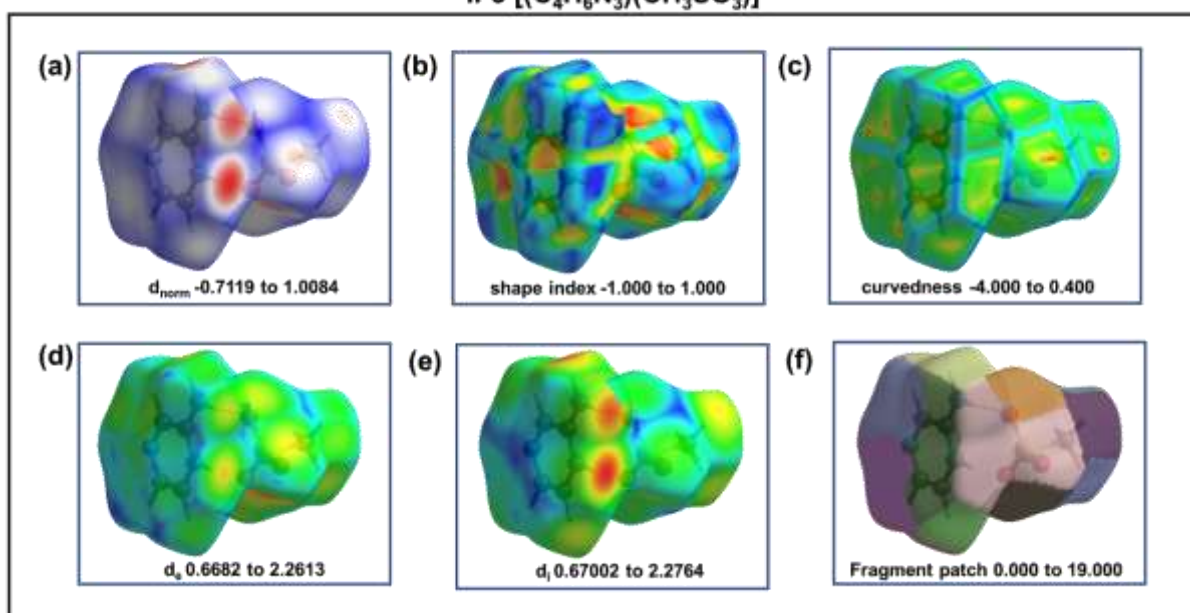

III  $[(C_4H_5N_3)_2(C_4H_6O_4)]$

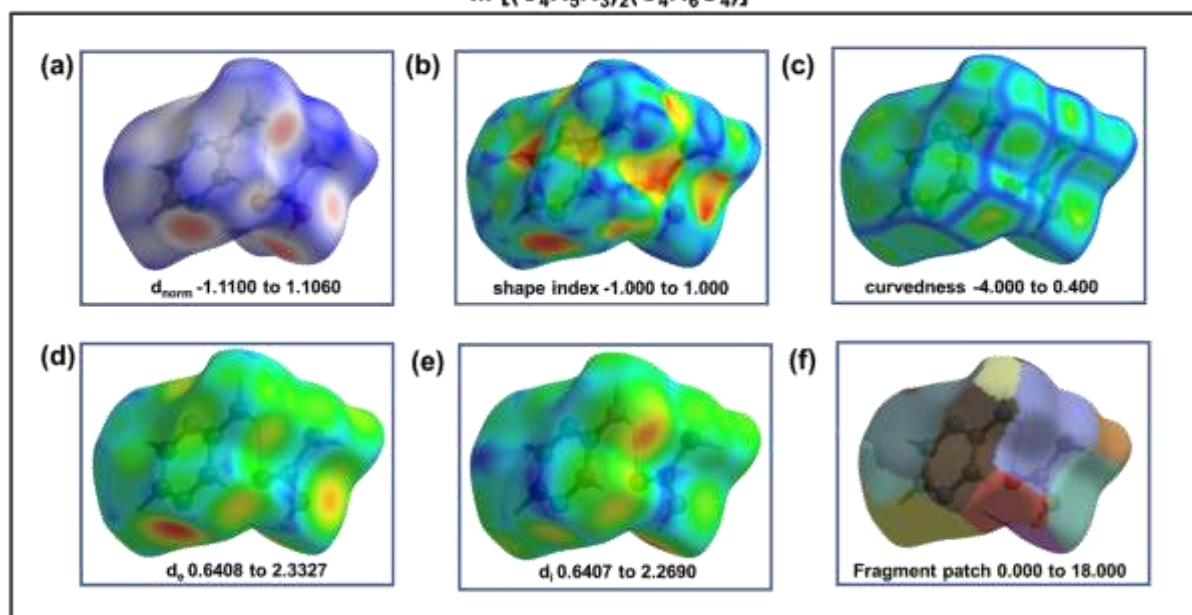



IV  $[(C_4H_5N_3)(H_3BO_3)_2]$

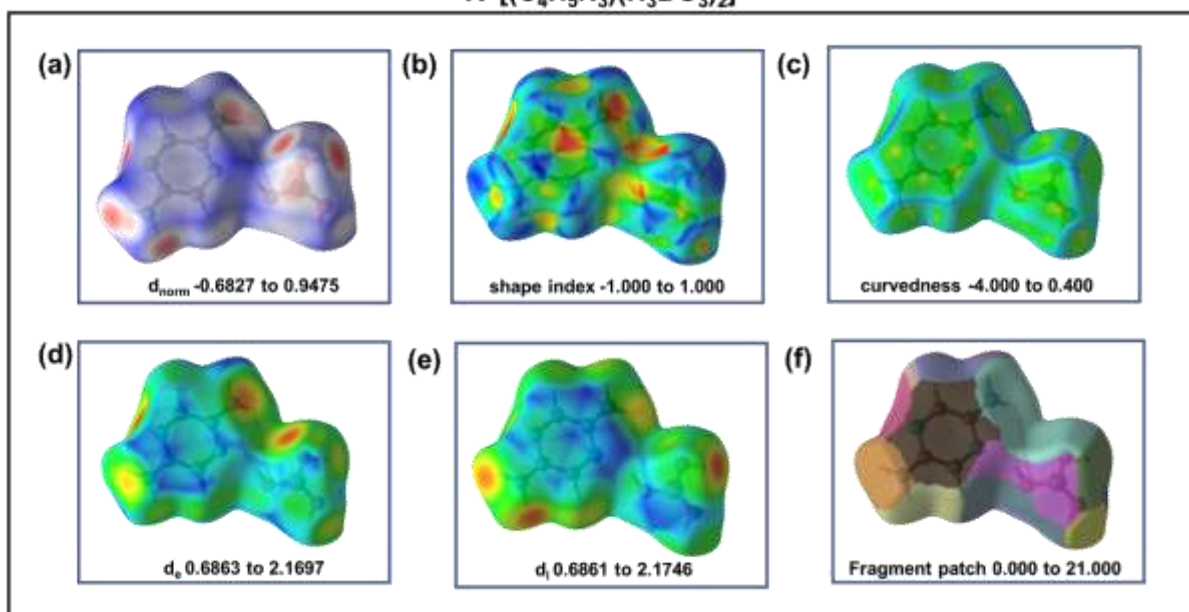

**Figure S7.** Visualization of hirshfeld surfaces:  $d_{norm}$  (a), shape index (b), curvedness (c)  $d_e$  (d),  $d_i$  (e), and fragment patch for I-1–I-2, II-1–II-3, III, and IV.

I-1 [(C<sub>4</sub>H<sub>6</sub>N<sub>3</sub>)(H<sub>2</sub>PO<sub>4</sub>)]

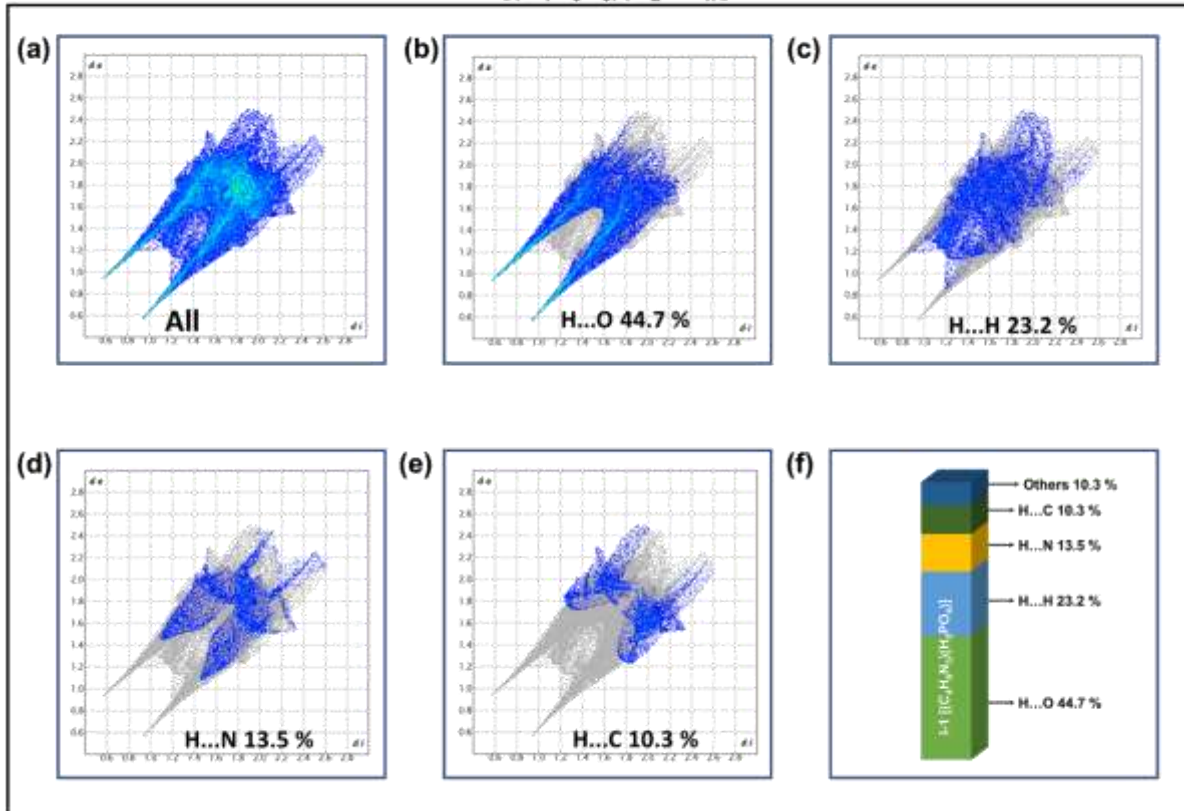

I-2 [(C<sub>4</sub>H<sub>6</sub>N<sub>3</sub>)(BF<sub>4</sub>)]

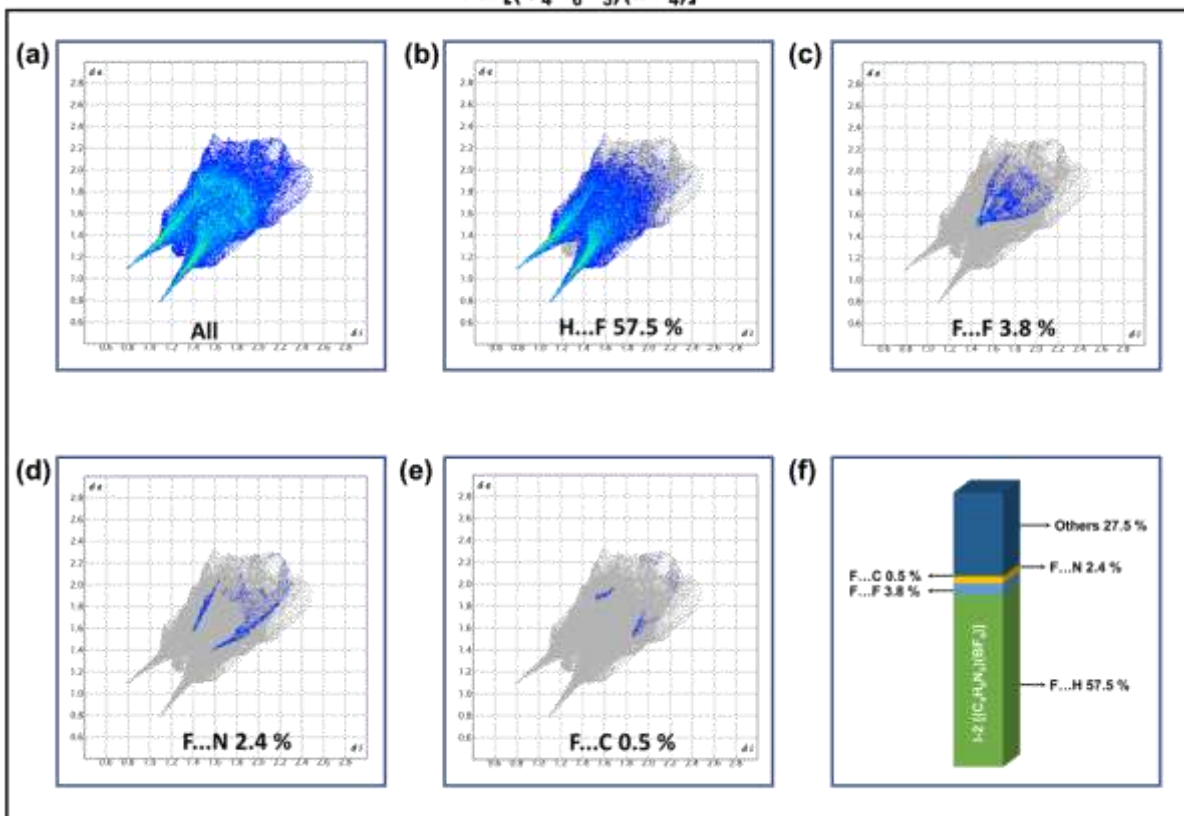

II-1 [(C<sub>4</sub>H<sub>5</sub>N<sub>3</sub>)(C<sub>4</sub>H<sub>6</sub>N<sub>3</sub>)(CF<sub>3</sub>SO<sub>3</sub>)]

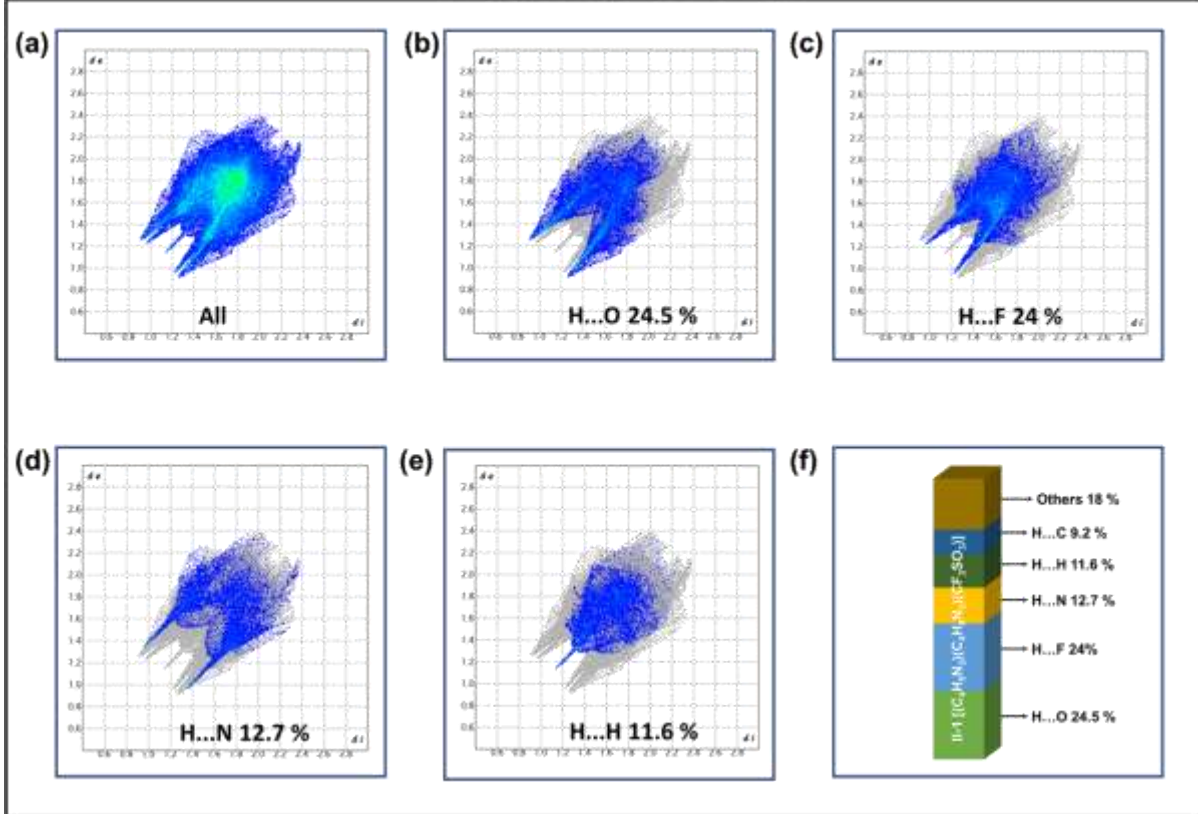

II-2 [(C<sub>4</sub>H<sub>6</sub>N<sub>3</sub>)(NH<sub>2</sub>SO<sub>3</sub>)]

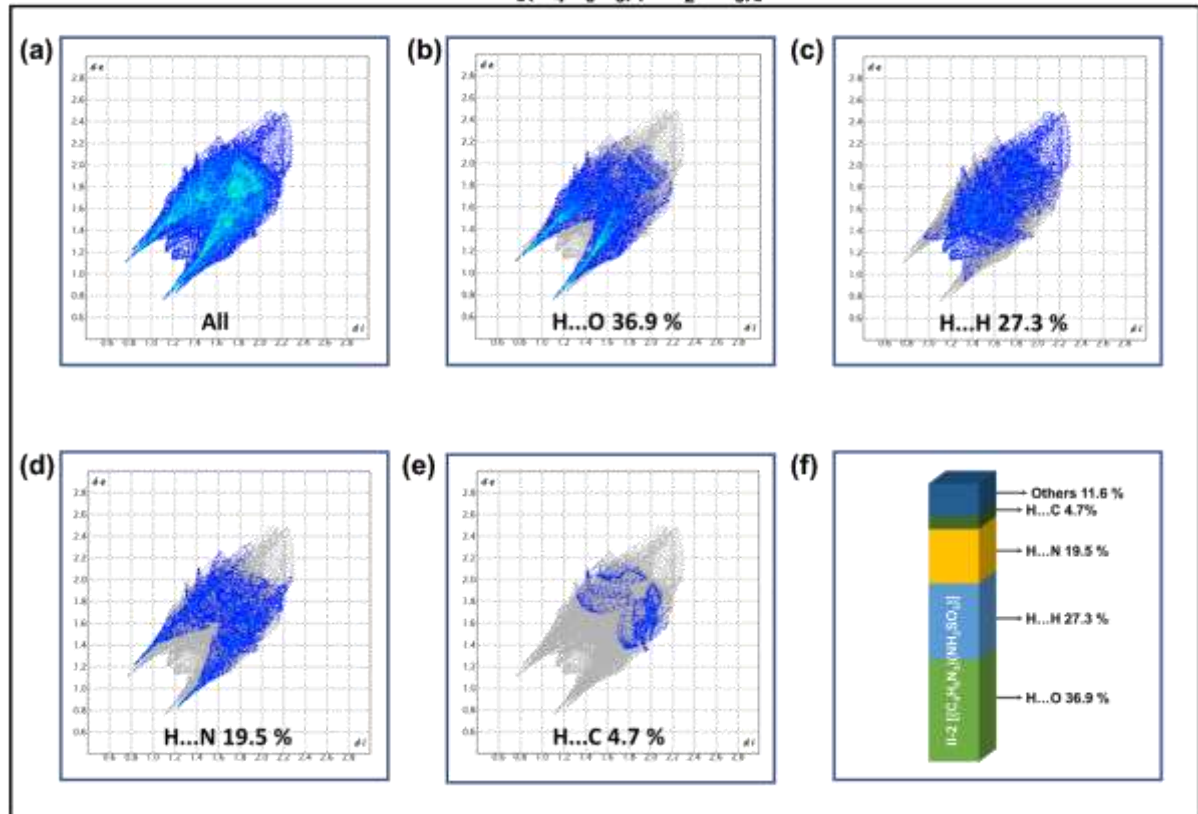

II-3 [(C<sub>4</sub>H<sub>6</sub>N<sub>3</sub>)(CH<sub>3</sub>SO<sub>3</sub>)]

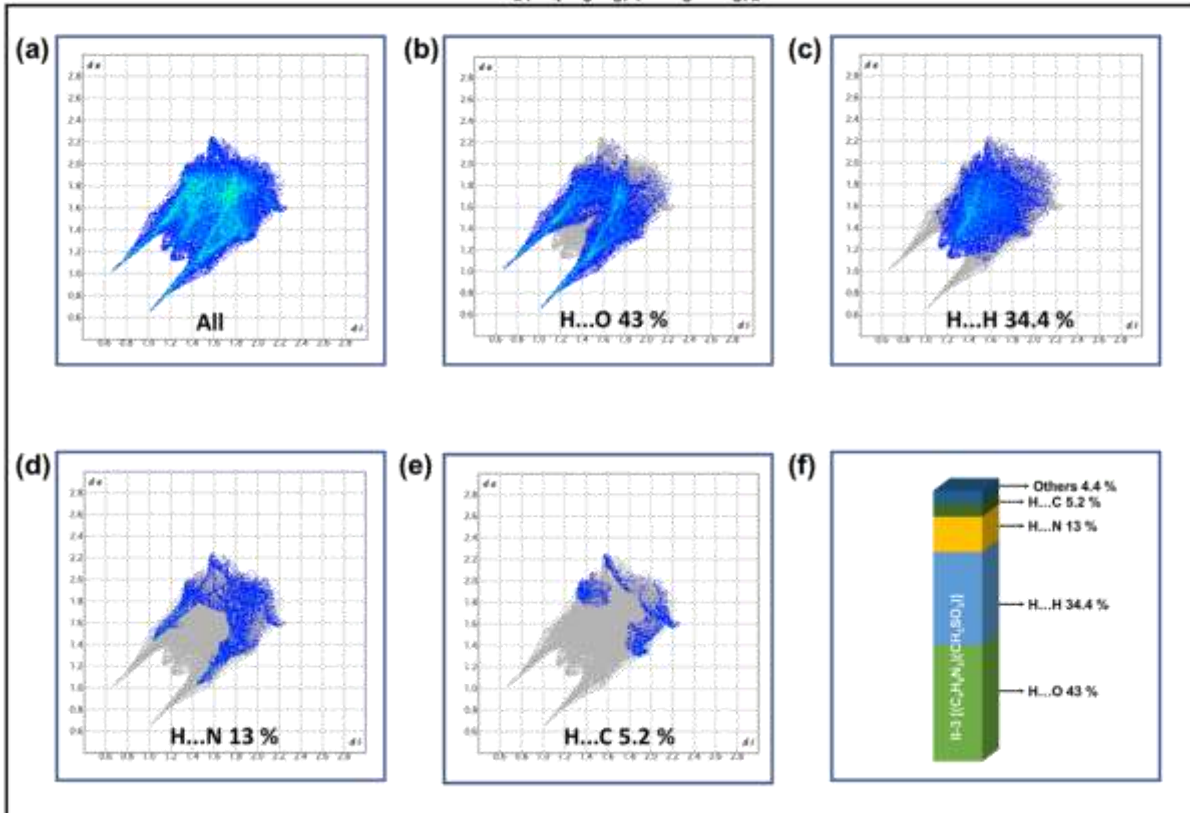

III [(C<sub>4</sub>H<sub>5</sub>N<sub>3</sub>)<sub>2</sub>(C<sub>4</sub>H<sub>6</sub>O<sub>4</sub>)]

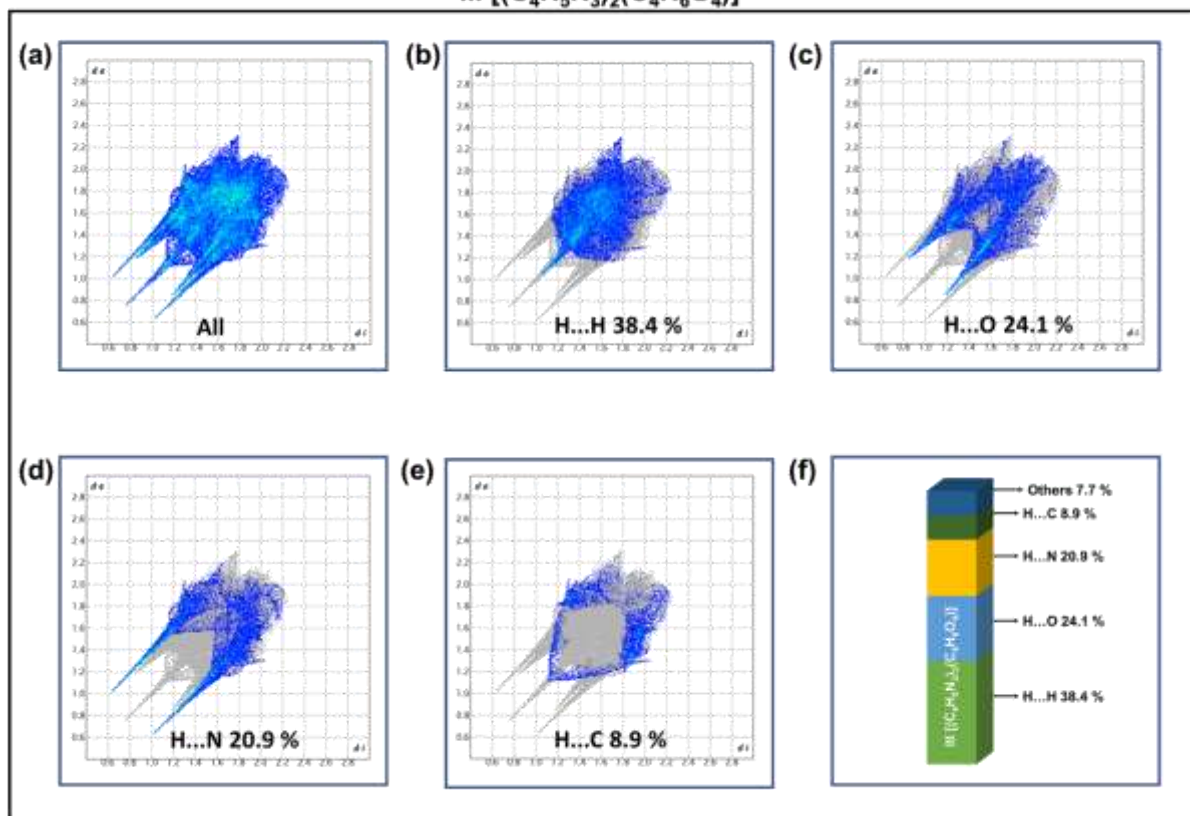

IV  $[(C_4H_5N_3)(H_3BO_3)_2]$

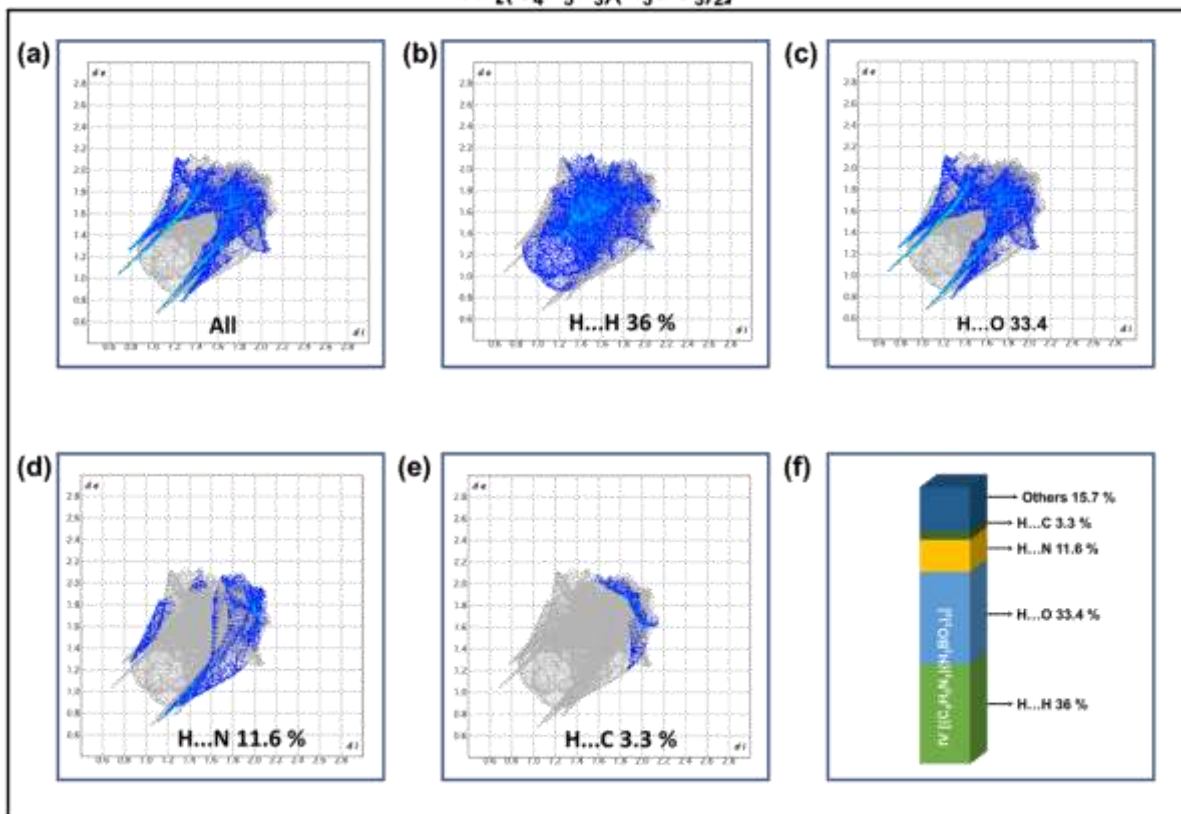

**Figure S8.** Visualization of 2D fingerprint plots for overall interactions and individual interactions of atom types in crystal packing of **I-1-I-2**, **II-1-II-3**, **III**, and **IV**.

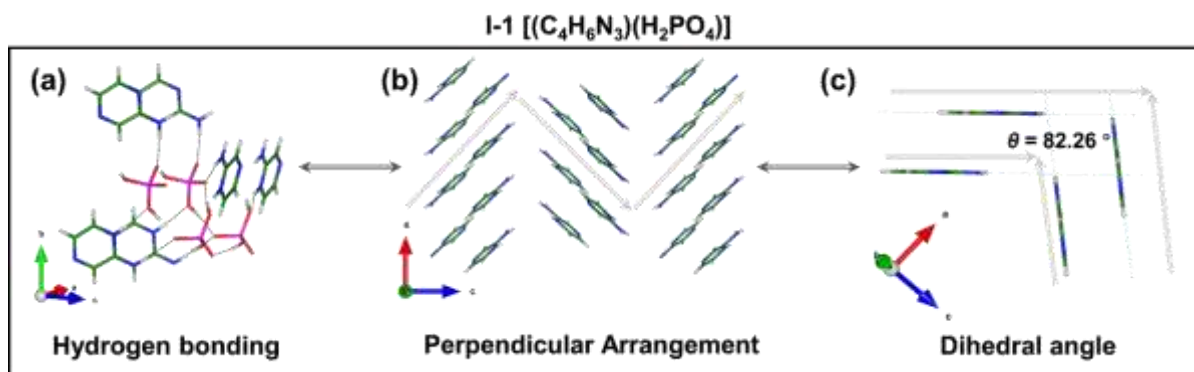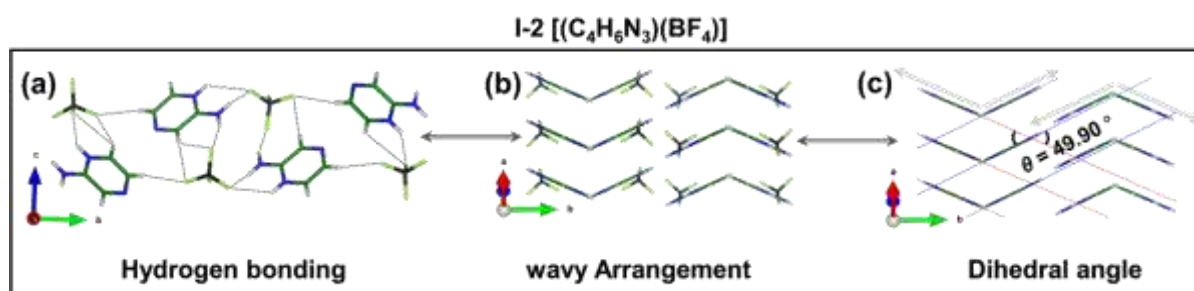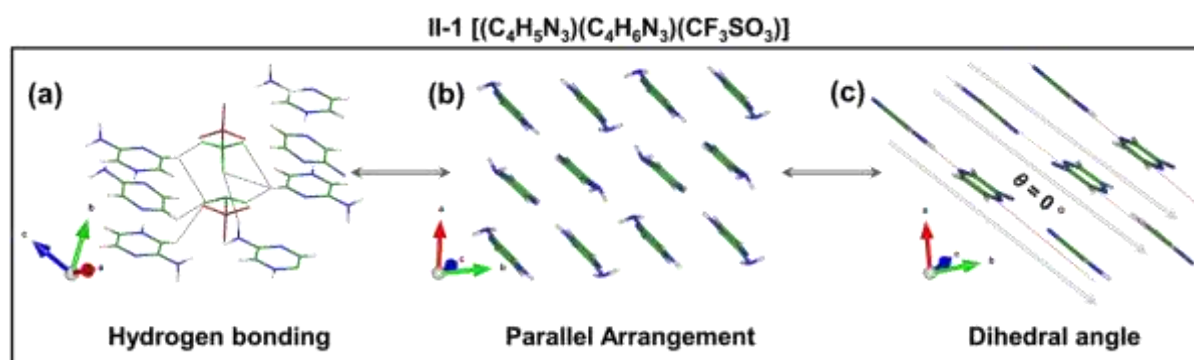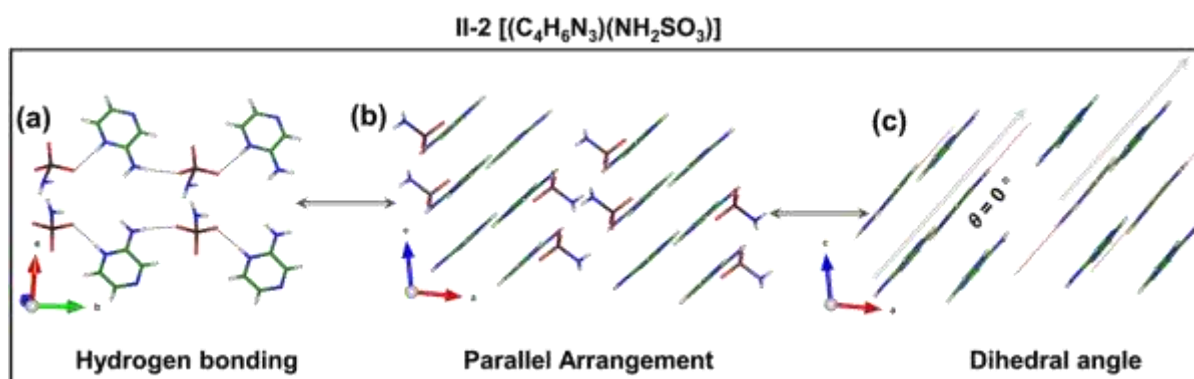

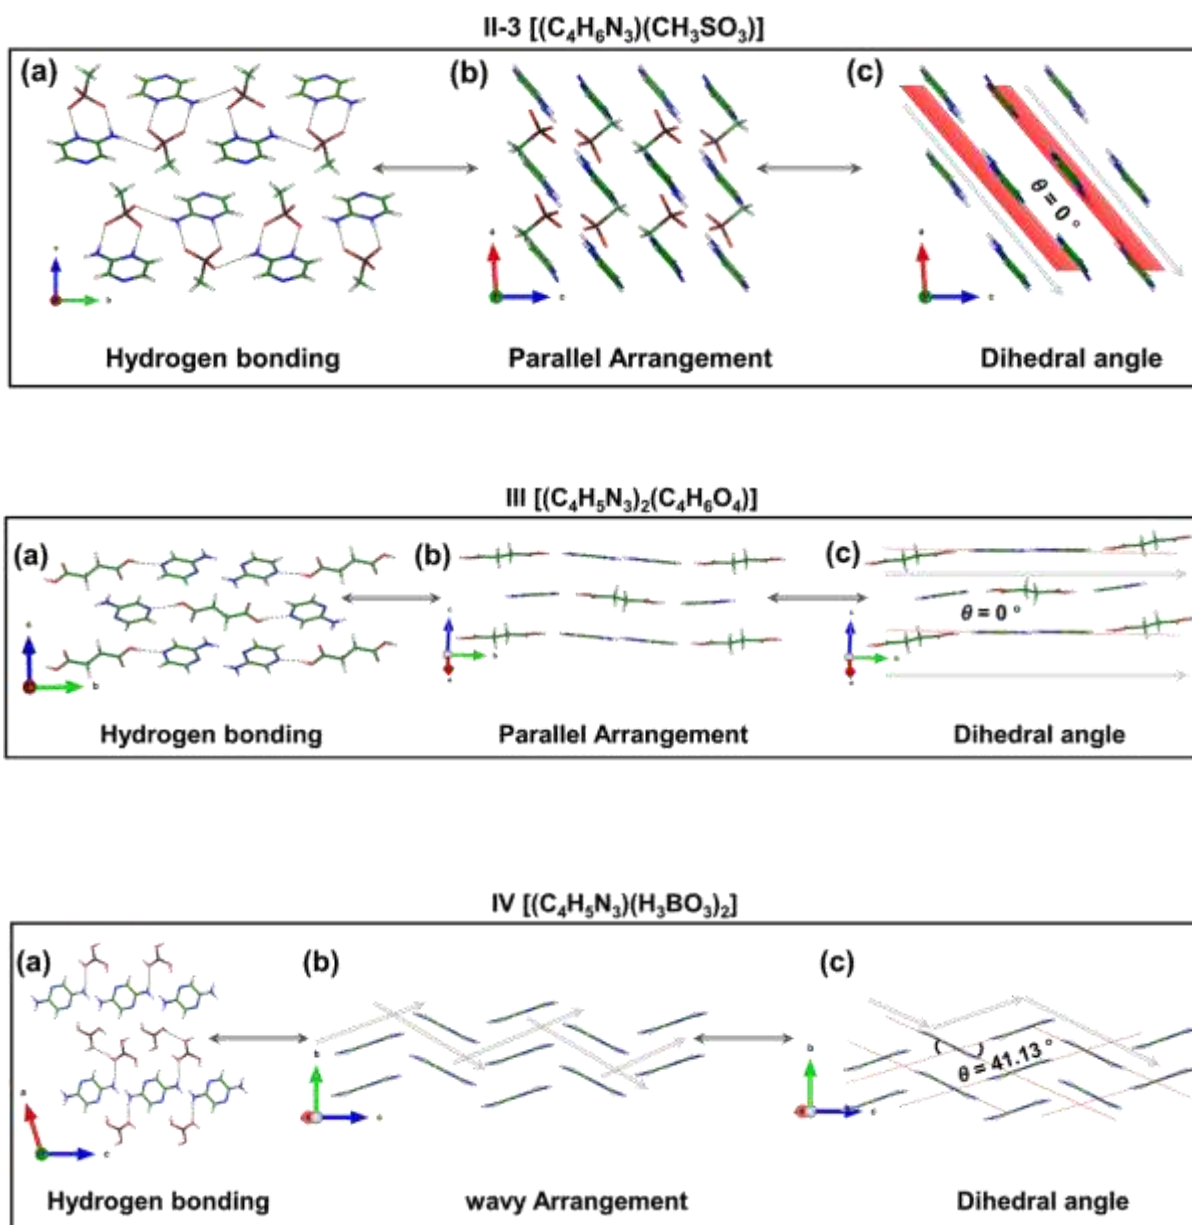

**Figure S9.** Visualization of hydrogen bonding, spatial arrangement, and dihedral angle of I-1-I-2, II-1-II-3, III, and IV.

We attempted various approaches, adjusting temperature, ratios, and solvent composition, to synthesize this compound without disorder; however, all efforts have been unsuccessful.

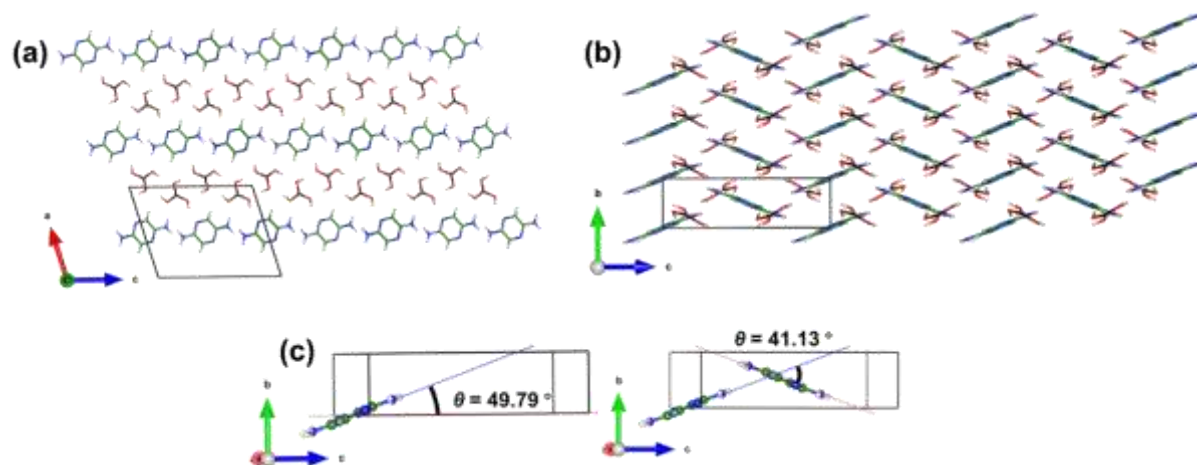

**Figure S10.** Crystal packing of IV along the a and b axis (a,b), and dihedral angle ( $\gamma$ ) of [APZ] along (010) plane and angles between  $\pi$ -conjugated units (c).



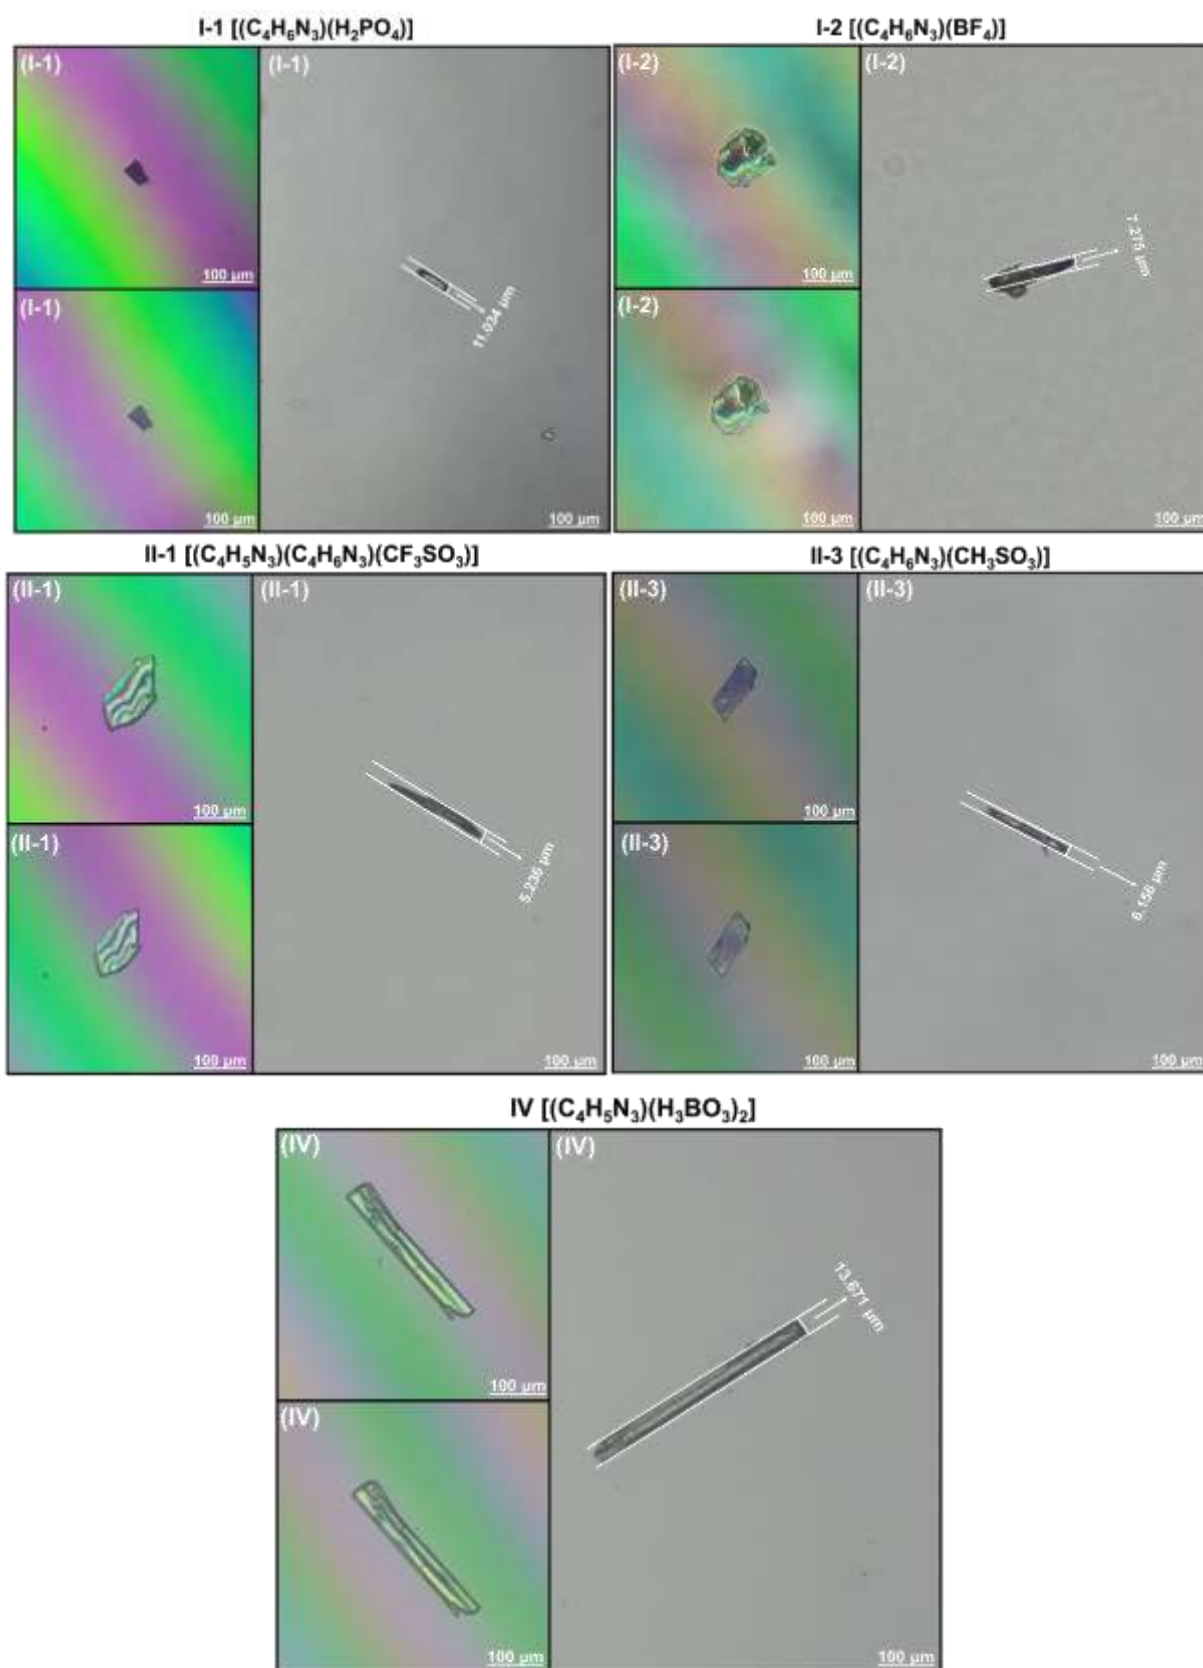

**Figure S11.** Birefringence measurements under the polarizing microscope and the thickness for I-1–I-2, II-1, II-3, and IV.

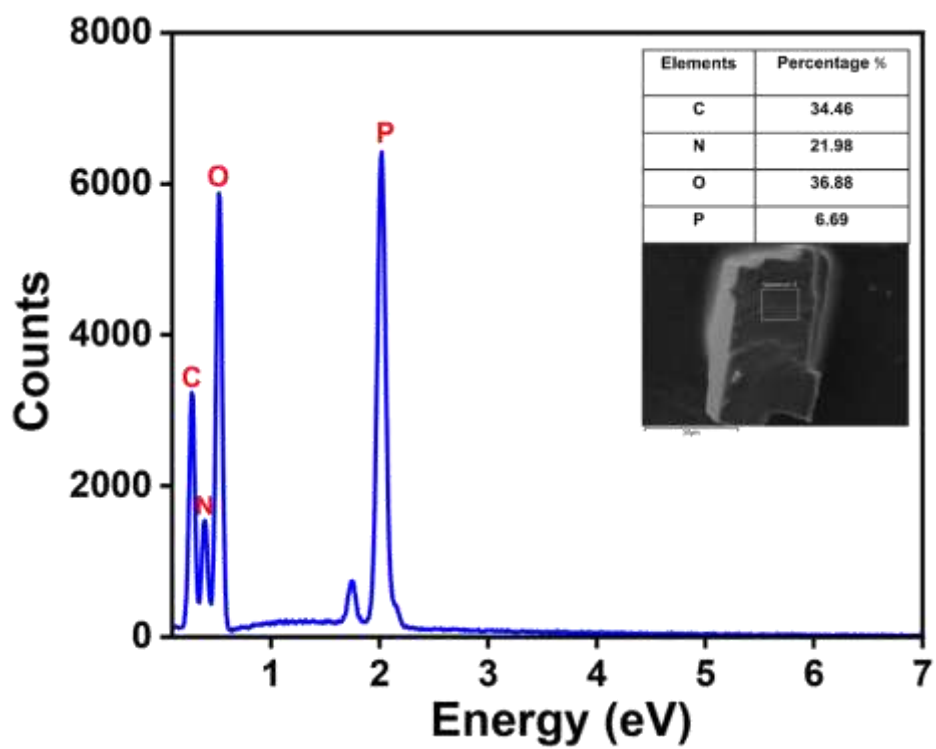

**Figure S12.** Energy dispersive X-ray spectroscopy (EDS) analysis of **I-1**.

Given the propensity of NCS crystal structures to exhibit second-harmonic generation (SHG). The SHG effect was measured on polycrystalline samples by Kurtz-Perry method at a wavelength of 1064 nm, using KDP as the reference.<sup>[4]</sup> However, upon testing **I-1**, the SHG signal was negligible. It can be attributed to the perpendicular arrangement of fundamental structural components  $[\text{APZ}]^+$  within crystal structure, which effectively cancel out frequency-doubling effect. This finding was further substantiated by SHG-weighted electron density analysis,<sup>[77]</sup> which provide insights into the origin of the SHG effects. The majority of SHG-weighted electron clouds are concentrated around the C-C, and C-N bonds, as well as C and N atoms, confirming that the  $[\text{APZ}]^+$  units are the primary determinants of the SHG response.

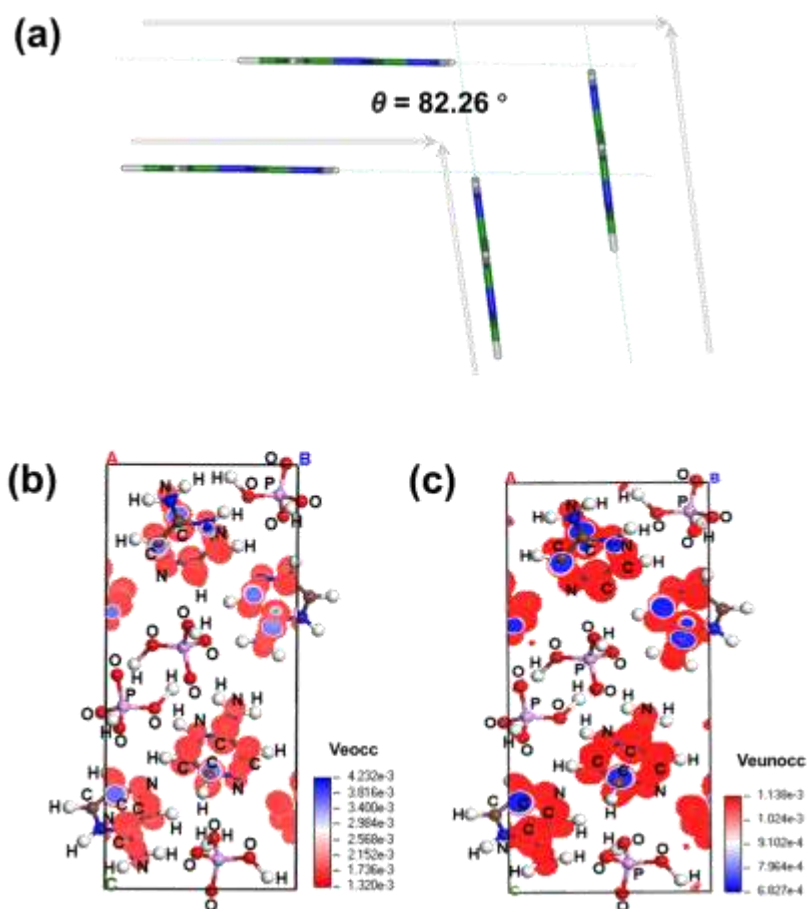

**Figure S13.** Spatial Arrangement of functional units in **I-1** (a), SHG-weighted densities for occupied and unoccupied electronic states in **I-1** (b,c).

## References

- (1) *SAINT, Version 7.60A*, Bruker Analytical X-ray Instruments, Inc. Madison, WI, **2008**.
- (2) G. M. Sheldrick, *SHELXTL*; Bruker AXS Inc.: Madison, WI, **2008**.
- (3) A. L. Spek, Single-crystal Structure Validation with the Program PLATON. *J. Appl. Crystallogr.* **2003**, *36*, 7.
- (4) S. K. Kurt, T. T. Perry. *J. Appl. Phys.* **1968**, *39*, 3798-3813.
- (5) S. J. Clark, M. D. Segall, C. J. Pickard, P. J. Hasnip, M. I. J. Probert, K. Refson, M. C. Payne, Z. *Kristallog. Cryst. Mater.* **2005**, *220*, 567– 570.
- (6) J. P. Perdew, K. Burke, M. Ernzerhof, *Phys. Rev. Lett.* **1996**, *77*, 3865.
- (7) J. H. Monkhorst, J. D. Pack, *Phys. Rev. B.* **1976**, *13*, 5188.
- (8) C. Aversa, J. E. Sipe, *Phys. Rev. B.* **1995**, *52*, 14636–14645.
- (9) S. N. Rashkeev, W. R. L. Lambrecht, B. Segall, *Phys. Rev. B.* **1998**, *57*, 3905–3919.
- (10) M. J. Frisch, G. W. Trucks, H. B. Schlegel, G. E. Scuseria, M. A. Robb, J. R. Cheeseman, G. Scalmani, V. Barone, B. Mennucci, G. A. Petersson, H. Nakatsuji, M. Caricato, X. Li, H. P. Hratchian, A. F. Izmaylov, J. Bloino, G. Zheng, J. L. Sonnenberg, M. Hada, M. Ehara, K. Toyota, R. Fukuda, J. Hasegawa, M. Ishida, T. Nakajima, Y. Honda, O. Kitao, H. Nakai, T. Vreven, J. A. Montgomery, Jr. , J. E. Peralta, F. Ogliaro, M. Bearpark, J. J. Heyd, E. Brothers, K. N. Kudin, V. N. Staroverov, R. Kobayashi, J. Normand, K. Raghavachari, A. Rendell, J. C. Burant, S. S. Iyengar, J. Tomasi, M. Cossi, N. Rega, J. M. Millam, M. Klene, J. E. Knox, J. B. Cross, V. Bakken, C. Adamo, J. Jaramillo, R. Gomperts, R. E. Stratmann, O. Yazyev, A. J. Austin, R. Cammi, C. Pomelli, J. W. Ochterski, R. L. Martin, K. Morokuma, V. G. Zakrzewski, G. A. Voth, P. Salvador, J. J. Dannenberg, S. Dapprich, A. D. Daniels, O. Farkas, J. B. Foresman, J. V. Ortiz, J. Cioslowski, D. J. Fox, *Gaussian 09, Revision A.02*, Gaussian, Inc., Wallingford CT **2009**.
- (11) P. J. Stephens, F. J. Devlin, C. F. Chabalowski, M. J. Frisch, *J. Phys. Chem.* **1994**, *98*, 11623-11627.
- (12) I. Němec, I. Matulková, P. Held, J. Kroupa, P. Němec, D. Li, L. Bohatý, P. Becker, *Opt. Mater.* **2017**, *69*, 420–431.
- (13) J. Zhang, X. Zhang, Y. Wang, K. Wu, B. Zhang, *Inorg. Chem.* **2022**, *61*, 18622–18628.
- (14) L. Xiong, J. Chen, J. Lu, C.-Y. Pan, L.-M. Wu, *Chem. Mater.* **2018**, *30*, 7823–7830.
- (15) H. Zhang, D. Jiao, X. Li, C. He, X. Dong, K. Huang, J. Li, X. An, Q. Wei, G. Wang, *Small.* **2024**, *20*, 2401464.
- (16) Y. Liu, X. Liu, Z. Xiong, B. Liu, J. Xu, L. Li, S. Zhao, Z. Lin, M. Hong, J. Luo, *Inorg. Chem.* **2021**, *60*, 14544–14549.
- (17) Y. Song, M. Luo, D. Lin, C. Lin, Z. Wang, X. Long, N. Ye, *ACS Omega.* **2021**, *6*, 9263–9268.
- (18) C. Wu, X. Jiang, Z. Wang, H. Sha, Z. Lin, Z. Huang, X. Long, M. G. Humphrey, C. Zhang, *Angew. Chem. Int. Ed.* **2021**, *60*, 14806–14810.
- (19) M. Zhang, B. Zhang, D. Yang, Y. Wang, *Inorg. Chem.* **2021**, *60*, 18483–18489.
- (20) Z. Bai, J. Lee, H. Kim, C. L. Hu, K. M. Ok, *Small.* **2023**, *19*, 2301756.
- (21) M. Xia, M. Mutailipu, F. Li, Z. Yang, S. Pan, *Cryst. Growth Des.* **2021**, *21*, 1869–1877.
- (22) H. Zhou, M. Cheng, D. Chu, X. Liu, R. An, S. Pan, Z. Yang, *Angew. Chem. Int. Ed.* **2024**, *63*, e202413680.
- (23) M. Mutailipu, J. Han, Z. Li, F. Li, J. Li, F. Zhang, X. Long, Z. Yang, S. Pan, *Nat. Photonics.* **2023**, *17*, 694–701.
- (24) M. Luo, C. Lin, D. Lin, N. Ye, *Angew. Chem. Int. Ed.* **2020**, *59*, 15978–15981.
- (25) P. Vivek, G. S. Kumar, A. Steephen, R. M. Jauhar, A. Suvitha, M. Rekha, M. Kowsalya, N. Karunagaran, R. Arunkumar, *J. Mater. Sci. Mater. Electron.* **2021**, *32*, 4493–4504.
- (26) X. Meng, X. Zhang, Q. Liu, Z. Zhou, X. Jiang, Y. Wang, Z. Lin, M. Xia, *Angew. Chem. Int. Ed.* **2023**, *62*, e202214848.
- (27) Y. Shen, Y. Zhou, X. Xue, H. Yu, S. Zhao, J. Luo, *Inorg. Chem. Front.* **2022**, *9*, 5226-5230.
- (28) X. Meng, F. Liang, K. Kang, J. Tang, T. Zeng, Z. Lin, M. Xia, *Inorg. Chem.* **2019**, *58*, 11289-11293.
- (29) D. Lin, M. Luo, C. Lin, F. Xu, N. Ye, *J. Am. Chem. Soc.* **2019**, *141*, 3390-3394.
- (30) Y. Chen, C. Hu, Z. Fang, J. Mao, *Inorg. Chem. Front.* **2021**, *8*, 3547-3555.
- (31) Y. Song, D. Lin, M. Luo, C. Lin, Q. Chen, N. Ye, *Inorg. Chem. Front.* **2020**, *7*, 150-156.
- (32) S.-F. Li, L. Hu, Y. Ma, F.-F. Mao, J. Zheng, X.-D. Zhang, D. Yan, *Inorg. Chem.* **2022**, *61*, 10182-10189.
- (33) J. Lu, Y.-K. Lian, L. Xiong, Q.-R. Wu, M. Zhao, K.-X. Shi, L. Chen, L.-M. Wu, *J. Am. Chem. Soc.* **2019**, *141*, 16151-16159.

- (34) X. Du, F. Wang, F. Liang, Z. Hu, Y. Wu, X. Zhang, *Inorg. Chem. Front.* **2023**, *10*, 5979-5985.
- (35) L. Liu, Z. Bai, L. Hu, D. Wei, Z. Lin, L. Zhang, *J. Mater. Chem. C* **2021**, *9*, 7452-7457.
- (36) L. Liu, C.-L. Hu, Z. Bai, F. Yuan, Y. Huang, L. Zhang, Z. Lin, *Chem. Commun.* **2020**, *56*, 14657-14660.
- (37) F. Liang, N. Wang, X. Liu, Z. Lin, Y. Wu, *Chem. Commun.* **2019**, *55*, 6257-6260.
- (38) X. Meng, F. Liang, J. Tang, K. Kang, Q. Huang, W. Yin, Z. Lin, M. Xia, *Eur. J. Inorg. Chem.* **2019**, *2019*, 2791-2795.
- (39) W. Huang, X. Wu, B. Ahmed, Y. Li, Y. Zhou, H. Wang, Y. Song, X. Kuang, J. Luo, S. Zhao, *Inorg. Chem. Front.* **2023**, *10*, 2039-2044.
- (40) L. Ren, L. Cheng, X. Zhou, J. Ren, L. Cao, L. Huang, X. Dong, Y. Zhou, D. Gao, G. Zou, *Inorg. Chem. Front.* **2023**, *10*, 5602-5610.
- (41) X. Meng, F. Liang, J. Tang, K. Kang, T. Zeng, W. Yin, R. Guo, Z. Lin, M. Xia, *Inorg. Chem.* **2019**, *58*, 8948-8952.
- (42) K. Kang, F. Liang, X. Meng, J. Tang, T. Zeng, W. Yin, M. Xia, Z. Lin, B. Kang, *Inorg. Chem.* **2019**, *58*, 9553-9556.
- (43) H. Jia, D. Xu, Z. Li, M. Arif, Y. Jiang, X. Hou, *Inorg. Chem. Front.* **2024**, *11*, 8331-8338.
- (44) W. Huang, X. Zhang, Y. Li, Y. Zhou, X. Chen, X. Li, F. Wu, M. Hong, J. Luo, S. Zhao, *Angew. Chem. Int. Ed.* **2022**, *61*, e202202746.
- (45) Y. Shen, L. Ma, G. Dong, H. Yu, J. Luo, *Inorg. Chem. Front.* **2023**, *10*, 2022-2029.
- (46) D. Dou, Q. Shi, Y. Bai, C. Chen, B. Zhang, Y. Wang, *Mater. Chem. Front.* **2023**, *7*, 5924-5931.
- (47) S. Z. Hao Chen, Bo Chen, Yaoguo Shen, Junhua Luo, *Inorg. Chem. Front.* **2023**, *10*, 3293.
- (48) Z. Li, F. Liang, Y. Guo, Z. Lin, J. Yao, G. Zhang, W. Yin, Y. Wu, C. Chen, *J. Mater. Chem. C* **2018**, *6*, 12879-12887.
- (49) N. Wang, F. Liang, Y. Yang, S. Zhang, Z. Lin, *Dalton Trans.* **2019**, *48*, 2271-2274.
- (50) L. Zhang, F. Wang, X. Zhang, F. Liang, Z. Hu, Y. Wu, *Cryst. Growth Des.* **2024**, *24*, 627-631.
- (51) X. Meng, F. Liang, K. Kang, J. Tang, Q. Huang, W. Yin, Z. Lin, M. Xia, *Dalton Trans.* **2019**, *48*, 9048-9052.
- (52) M. Aibibula, L. Wang, S. Huang, *ACS Omega* **2019**, *4*, 22197-22202.
- (53) M. Kalmutzki, M. Ströbele, F. Wackenhut, A. J. Meixner, H. J. Meyer, *Angew. Chem. Int. Ed.* **2014**, *53*, 14260-14263.
- (54) M. Kalmutzki, M. Ströbele, F. Wackenhut, A. J. Meixner, H. J. Meyer, *Inorg. Chem.* **2014**, *53*, 12540-12545.
- (55) Y. Shen, L. Ma, G. Dong, H. Yu, J. Luo, *Inorg. Chem. Front.* **2023**, *10*, 2022-2029.
- (56) Y. Shen, B. Chen, H. Chen, J. Luo, *Inorg. Chem.* **2022**, *61*, 14242-14246.
- (57) Q. Xu, Y. Liu, Q. Wu, L. Hou, Y. Li, L. Li, Z. Lin, S. Zhao, J. Luo, *Sci. China Mater.* **2023**, *66*, 3271-3277.
- (58) C. Jin, F. Li, Z. Yang, S. Pan, M. Mutailipu, *J. Mater. Chem. C* **2022**, *10*, 6590-6595.
- (59) X. Zhang, X. Du, J. Wang, F. Wang, F. Liang, Z. Hu, Z. Lin, Y. Wu, *ACS Appl. Mater. Interfaces.* **2022**, *14*, 53074-53080.
- (60) L. Qi, X. Jiang, K. Duanmu, C. Wu, Z. Lin, Z. Huang, M. G. Humphrey, C. Zhang, *J. Am. Chem. Soc.* **2024**, *146*, 9975-9983.
- (61) Y. Li, X. Zhang, J. Zheng, Y. Zhou, W. Huang, Y. Song, H. Wang, X. Song, J. Luo, S. Zhao, *Angew. Chem. Int. Ed.* **2023**, *62*, e202304498.
- (62) R. Wei, H. Huang, D. Yang, Y. Wang, B. Zhang, *Adv. Opt. Mater.* **2024**, DOI:10.1002/adom.202401814.
- (63) J. Lu, X. Liu, M. Zhao, X. Bin Deng, K. X. Shi, Q. R. Wu, L. Chen, L. M. Wu, *J. Am. Chem. Soc.* **2021**, *143*, 3647-3654.
- (64) Z. P. Zhang, X. Liu, X. Liu, Z. W. Lu, X. Sui, B. Y. Zhen, Z. Lin, L. Chen, L. M. Wu, *Chem. Mater.* **2022**, *34*, 1976-1984.
- (65) M. Arif, X. Liu, Z. Li, H. Jia, Y. Jiang, Z. Yang, X. Hou, S. Pan, *Adv. Opt. Mater.* **2025**, DOI: 10.1002/adom.202402327.
- (66) H. Qiu, W. Cai, Z. Yang, Y. Liu, M. Mutailipu, S. Pan, *ACS Org. Inorg. Au* **2021**, *1*, 6-10.
- (67) C. Jin, H. Zeng, F. Zhang, H. Qiu, Z. Yang, M. Mutailipu, S. Pan, *Chem. Mater.* **2022**, *34*, 440-450.
- (68) C. Hu, C. Shen, H. Zhou, J. Han, Z. Yang, K. R. Poepelmeier, F. Zhang, S. Pan, *Small. Struct.* **2024**, *5*, 240029.
- (69) C. Jin, F. Li, Z. Yang, S. Pan, M. Mutailipu, *J. Mater. Chem. C* **2022**, *10*, 6590-6595.

- (70) D. Dou, Q. Shi, H. Li, B. Zhang, D. Yang, Y. Wang, *Adv. Sci.* 2024, **11**, 2401325.
- (71) Z. Zhang, X. Liu, R. Wang, S. Zhao, W. He, H. Chen, X. Deng, L. Wu, Z. Zhou, L. Chen, *Angew. Chem. Int. Ed.* **2024**, *136*, e202408551.
- (72) M. Kloda, I. Matulková, I. Císařová, P. Becker, L. Bohatý, P. Němec, R. Gyepes, I. Němec, *Crystals*. **2019**, *9*, 403.
- (73) S. Thangarasu, V. Siva, S. Athimoolam, S. A. Bahadur, *J. Theor. Comput. Chem.* **2018**, *17*, 1850021.
- (74) S. Thangarasu, S. Suresh Kumar, S. Athimoolam, B. Sridhar, S. Asath Bahadur, R. Shanmugam, A. Thamarachelvan, *J. Mol. Struct.* **2014**, *1074*, 107–117.
- (75) S. Manivannan, S. Dhanuskodi, K. Kirschbaum, S. K. Tiwari, *Cryst. Growth Des.* **2005**, *5*, 1463–1468.
- (76) J. Fan, Z. Yan, Z. Chen, H. Li, Z. Yang, F. Zhang, S. Pan, *Sci. China Chem.* **2024**, DOI: 10.1007/s11426-024-2170-6.
- (77) M. H. Lee, C. H. Yang, J. H. Jan, *Phys. Rev. B.* **2004**, *70*, 1–11.
